# Supplementary material
Source: publisher site journal article supplement (https://mbmg.pensoft.net/article/95650/download/suppl/31/)
Supplement: Supplementary file 1

## Sheet: General
											WEEK 1: September 24 - October 01												WEEK 2: October 01 - October 08												WEEK 3: October 08 - October 15													WEEK 4: October 15 - October 22
											Suction Trap week 1	Day 1 - TIP 1437		Day 2 - TIP1421		Day 3 - TIP1528		Day 4 - TIP1484		Day 5 - TIP1432	Day 6 - TIP1486		Suction Trap week 2		Day 1 - TIP1547		Day 2 - TIP1554		Day 4 - TIP1443		Day 5 - TIP1418		Day 6 - TIP1527		Suction Trap week 3		Day 1 - TIP1481		Day 2 - TIP1523		Day 3 - TIP1436		Day 4 - TIP1420	Day 5 - TIP1479		Day 6 - TIP1485		Suction Trap week 4	Day 1 - TIP1442
ASV	OTU	Root	Kingdom	Phylum	Class	Order	Family	Genus	Species	Reads	K3HWJ_211019103_ext1_pcr2	K3HWJ_211019108_ext1_pcr1	K3HWJ_211019108_ext1_pcr2	K3HWJ_211019106_ext1_pcr1	K3HWJ_211019106_ext1_pcr2	K3HWJ_211019113_ext1_pcr1	K3HWJ_211019113_ext1_pcr2	K3HWJ_211019110_ext1_pcr1	K3HWJ_211019110_ext1_pcr2	K3HWJ_211019107_ext1_pcr2	K3HWJ_211019111_ext1_pcr1	K3HWJ_211019111_ext1_pcr2	K3HWJ_211019104_ext1_pcr1	K3HWJ_211019104_ext1_pcr2	K3HWJ_211019114_ext1_pcr1	K3HWJ_211019114_ext1_pcr2	K3HWJ_211019116_ext1_pcr1	K3HWJ_211019116_ext1_pcr2	K3HWJ_211019109_ext1_pcr1	K3HWJ_211019109_ext1_pcr2	K3HWJ_211019105_ext1_pcr1	K3HWJ_211019105_ext1_pcr2	K3HWJ_211019112_ext1_pcr1	K3HWJ_211019112_ext1_pcr2	K3HWJ_211028001_ext1_pcr1	K3HWJ_211028001_ext1_pcr2	K3HWJ_211028009_ext1_pcr1	K3HWJ_211028009_ext1_pcr2	K3HWJ_211028012_ext1_pcr1	K3HWJ_211028012_ext1_pcr2	K3HWJ_211028005_ext1_pcr1	K3HWJ_211028005_ext1_pcr2	K3HWJ_211028003_ext1_pcr2	K3HWJ_211028007_ext1_pcr1	K3HWJ_211028007_ext1_pcr2	K3HWJ_211028010_ext1_pcr1	K3HWJ_211028010_ext1_pcr2	K3HWJ_211028002_ext1_pcr2	K3HWJ_211028006_ext1_pcr1
ASV001	TTTAGCATCTTTAGAAGGTCATTCAGGGAGTTCAGTTGATTTTGCAATTTTTTCTTTACATTTAGCAGGGGCTTCTTCAATTATAGGGGCTATTAATTTTATTTCAACCATTATAAATATACGTTCTTATGATATTGGGATGGAAAAGATTTCTTTATTTGTTTGGTCCGTATTAATTACGGCTGTTTTACTACTTTTATCTTTA	Root	Metazoa	Arthropoda	Arachnida	Araneae	Araneae sp.	Araneae sp.	Araneae sp.	2088	0	0	0	0	0	0	0	0	0	0	0	0	0	0	72	68	0	0	0	0	0	0	0	0	0	0	0	0	0	0	0	0	0	0	0	0	0	0	0
ASV002	TTTAGCTTCTAGAATTGGACATTCAGGTAGATCTGTTGATTTTGCTATTTTTTCTTTACATTTAGCTGGAGCTTCTTCTATTATAGGAGCTATTAATTTTATTTCAACTATTATAAATATGCGTATGTTAGGTATGAGAATAGAGAAGGTATCTTTATTTGTATGATCTGTATTGATTACGGCTGTTTTATTATTATTATCATTA	Root	Metazoa	Arthropoda	Arachnida	Araneae	Araneidae	Araneidae sp.	Araneidae sp.	761	0	0	0	0	0	0	0	0	0	0	0	0	0	0	0	0	0	0	0	0	0	0	0	0	0	0	0	0	0	0	0	0	0	0	0	0	0	0	0
ASV003	TTTAGCTTCTCTAGAAGGTCATGCAGGGAGATCAGTAGATTTTGCTATTTTTTCTTTACATTTAGCTGGGGCTTCTTCTATTATAGGGGCTATTAATTTTATTTCAACTATTATTAATATACGGTTTTATGGGATAACTATAGAAAAGGTTCCGTTATTTGTTTGGTCAGTATTAATTACTGCTGTTTTACTATTATTATCTTTA	Root	Metazoa	Arthropoda	Arachnida	Araneae	Araneidae	Backobourkia	Backobourkia collina	5058	0	0	0	0	0	0	0	2521	2536	0	0	0	0	0	0	0	0	0	0	0	0	0	0	1	0	0	0	0	0	0	0	0	0	0	0	0	0	0	0
ASV004	TCTTGCTTCTACTGTAGGGCATATGGGAAGAGCTATAGATTTTGCTATTTTTTCATTACATTTGGCTGGAGCTTCATCAATTATAGGTGCAGTTAATTTTATTACTACTATTATCAATATACGTCCTGTAGGAATAACTATAGAAAGGATTCCTTTGTTTGTTTGGTCTGTATTAATTACTGCAGTTTTATTATTATTATCCTTA	Root	Metazoa	Arthropoda	Arachnida	Araneae	Clubionidae	Clubiona	Clubiona sp. 1	579	0	0	0	0	0	0	0	0	0	0	0	0	0	0	0	0	0	0	0	0	0	0	0	0	0	0	0	0	0	0	0	0	0	0	0	0	0	0	0
ASV005	TCTTGCATCTACTGTGGGACATATGGGAAGAGCTATGGATTTTGCTATTTTTTCTTTACATTTAGCTGGGGCTTCTTCCATTATAGGAGCAGTAAATTTTATTACTACGATTGTTAATATACGGTCTGTAGGGATAACTATGGAGAAAGTTCCTTTATTTGTATGATCGGTTTTGATTACAGCTGTATTATTATTATTATCATTA	Root	Metazoa	Arthropoda	Arachnida	Araneae	Clubionidae	Clubiona	Clubiona sp. 2	70	0	0	0	0	0	0	0	0	0	0	0	0	0	0	0	0	0	0	0	0	0	0	0	0	0	0	0	0	0	0	0	0	0	0	0	0	0	0	0
ASV006	TTTAGCTTCTTTAACTGGACATGCAGGAAGTTCGGTAGATTTTGCTATTTTTTCTTTACATTTAGCTGGAGCTTCATCGATTATAGGTGCTATTAATTTTATTTCGACTGTTATTAATATACGTTTAAATGGAATAAGAATAGAAAAGGTTCCTTTATTTGTGTGATCTGTATTAATTACAGCTGTTTTATTATTATTGTCTTTA	Root	Metazoa	Arthropoda	Arachnida	Araneae	Desidae	Desidae sp.	Desidae sp.	106	0	0	0	0	0	0	0	0	0	0	0	0	0	0	0	0	0	0	0	0	0	0	0	0	0	0	0	0	0	0	0	0	0	0	0	0	0	0	0
ASV007	TTTAGCATCTAGAATTGGACATGTAGGAAGAGCTATAGACTTTGCTATTTTTTCTTTACATTTAGCTGGTGCTTCTTCTATTATAGGAGCAATTAATTTTATTACTACAGTAGTAAATATACGATCTTATGGAATATCTATGGAAAAGGTTTCTTTGTTTGTATGGTCAGTAATGATTACTGCGGTTTTATTATTATTGTCATTA	Root	Metazoa	Arthropoda	Arachnida	Araneae	Gnaphosidae	Gnaphosidae sp.	Gnaphosidae sp.	5547	0	0	0	0	0	0	0	0	0	0	0	0	0	0	0	0	0	0	0	0	0	0	0	0	0	0	0	0	0	0	0	0	0	0	0	0	0	0	0
ASV008	TTTAGCCTCTAGAATAGGTCATGCTGGTAGTTCTGTGGATTTTGCTATTTTTTCTCTTCATTTAGCTGGGGCTTCTTCGATTATAGGGGCTATCAATTTTATTACTACTATTATTAATATACGCTCTTGAGGGATGAGAATAGAGAAAGTTCCTTTATTTGTGTGATCTGTATTAATTACTGCTGTGTTATTATTATTATCTTTA	Root	Metazoa	Arthropoda	Arachnida	Araneae	Hahniidae	Hahniidae sp.	Hahniidae sp.	23	0	0	0	0	0	0	0	0	0	0	0	0	0	0	0	0	0	0	0	0	0	0	0	0	0	0	0	0	0	0	0	0	0	0	0	0	0	0	0
ASV009	TTTAGCTTCTTTAGAGGGTCATTCTGGTAGTTCTGTTGATTTTGCAATTTTTTCTTTACATTTAGCTGGTGCTTCTTCTATTATAGGGGCTATCAATTTTATTTCCACGATTTTGAATATACGCGGGTATGGAATAACTATAGAGAAAGTGCCTTTATTTGTATGATCAGTTTTAATTACAGCTGTGTTATTATTATTATCTTTG	Root	Metazoa	Arthropoda	Arachnida	Araneae	Linyphiidae	Erigone	Erigone sp.	1199	0	0	0	0	0	0	0	14	11	0	0	0	0	0	37	34	0	0	0	0	0	0	0	0	2	5	1	16	0	0	0	0	0	0	0	0	0	0	0
ASV010	TATTGCGTCTTTAGATGGACATTCTGGTAGTTCTGTTGATTTTGCTATTTTTTCTTTACATTTAGCAGGGGCTTCTTCAATTATGGGAGCTATTAATTTTATTTCTACAATTTTAAATATGCGAGGTTATGGAATAACTATAGAAAAGGTTCCATTATTTGTGTGATCTGTCTTGATTACAGCTGTATTACTTTTATTATCGTTA	Root	Metazoa	Arthropoda	Arachnida	Araneae	Linyphiidae	Linyphiidae sp.	Linyphiidae sp. 1	123	0	0	0	0	0	0	0	0	0	0	0	0	0	0	54	69	0	0	0	0	0	0	0	0	0	0	0	0	0	0	0	0	0	0	0	0	0	0	0
ASV011	TATTGCGTCTTTAGAAGGTCATTCTGGAAGTTCTGTTGATTTTGCTATTTTTTCTTTACATTTAGCAGGGGCTTCTTCAATTATAGGGGCTATTAATTTTATTTCTACAATTTTAAATATACGTGGTTATGGAATAACTATAGAGAAGGTACCATTATTTGTTTGGTCTGTTTTAATTACAGCTGTTTTACTTTTATTATCTTTA	Root	Metazoa	Arthropoda	Arachnida	Araneae	Linyphiidae	Linyphiidae sp.	Linyphiidae sp. 2	5	0	0	0	0	0	0	0	0	0	0	0	0	0	0	0	0	0	0	0	0	0	0	0	0	0	0	0	0	0	0	0	0	0	0	0	0	0	0	0
ASV012	TTTAGCTTCTAGAGTAGGTCATATAGGAAGTTCTATAGATTTTGCTATTTTTTCGTTACATTTAGCAGGTGCTTCTTCTATTATAGGAGCTATTAATTTTATTACTACTATTATTAATATACGTTTAGTTGGAATAAGAATAGAGAAAATTCCTTTATTCGTTTGGTCTGTTTTTATTACTGCTATTTTATTATTATTATCATTA	Root	Metazoa	Arthropoda	Arachnida	Araneae	Lycosidae	Artoriopsis	Artoriopsis expolita	33111	0	0	0	0	0	0	0	0	0	0	0	0	0	0	0	0	0	0	0	0	0	0	0	0	0	0	0	0	0	0	0	0	0	0	0	0	0	0	0
ASV013	TTTAGCATCATTAGAAGGACATGCTGGAAGATCAGTGGATTTTGCAATTTTTTCTCTTCATTTAGCAGGTGCATCTTCAATTATAGGAGCTATTAATTTTATTTCTACTATTTTAAATATACGGTCTTATGGAATAACTATAGAGAAAGTACCTTTATTTGTTTGGTCAGTTTTAATTACTGCTGTTTTATTGTTACTATCTTTA	Root	Metazoa	Arthropoda	Arachnida	Araneae	Nephilidae	Nephila	Nephila edulis	41130	0	0	0	0	0	0	0	0	0	0	25348	15765	0	0	0	0	0	0	0	0	0	0	3	0	0	0	0	0	0	0	0	0	0	14	0	0	0	0	0
ASV014	TTTGTCTTCTGTTGAAGGCCATTCTGGGAGTTCAGTAGATTTTGCTATTTTTTCTCTTCATTTAGCGGGGGCTTCTTCTATTATGGGGGCTATTAATTTTATTACTACTATTTTGAATATGCGGATGGAGGGAATAAGTATGGAAAAAGTTCCTTTATTTGTTTGATCGGTTTTAATTACTGCTGTTTTATTGTTATTGTCTTTG	Root	Metazoa	Arthropoda	Arachnida	Araneae	Nesticidae	Nesticidae sp.	Nesticidae sp. 1	1307	0	0	0	0	0	0	0	0	0	0	0	0	0	0	0	0	0	0	0	0	0	0	0	0	0	0	0	0	0	0	0	0	0	0	0	0	0	0	0
ASV015	TTTGTCTAGTTTAGAGGGGCATTTTGGAGGAGCTGTGGATTTTGCTATTTTTTCTCTTCATTTAGCTGGGGCTTCTTCCATTATGGGGGCCATTAATTTTATTTCTACTATTATTAATATGCGTAGAGTGGGAATAAGAATGGAAAAGGTTCCTTTATTTGTGTGATCAGTTTTGATTACTGCTTTTTTGTTATTGTTATCTTTG	Root	Metazoa	Arthropoda	Arachnida	Araneae	Nesticidae	Nesticidae sp.	Nesticidae sp. 2	82	0	0	0	0	0	0	0	0	0	0	0	0	0	0	0	0	0	0	0	0	0	0	0	0	0	0	0	0	0	0	0	0	0	0	0	0	0	0	0
ASV016	TTTAGCTTCGACTACTGGTCATATAGGGAGATCAATGGATTTTGCTATTTTTTCTTTACATTTAGCTGGGGCTTCTTCTATTATAGGAGCAGTAAATTTTATTTCGACTATTATTAATATACGATTAAGTAGAATAAGAATAGAAAAGGTGCCTTTATTTGTATGGTCGGTTTTTATTACTGCTATTTTATTGCTTTTATCTCTG	Root	Metazoa	Arthropoda	Arachnida	Araneae	Oxyopidae	Oxyopes	Oxyopes sp.	31	0	0	0	0	0	0	0	0	0	0	0	0	0	0	0	0	0	0	0	0	0	0	0	0	0	0	0	0	0	0	0	0	0	0	0	0	0	0	0
ASV017	GTTGGCTTCTGTTGTAGGCCATAGAGGGAGATCTGTTGATTTTGCGATTTTTTCTTTACATTTGGCTGGTGCTTCTTCTATTATAGGTGCTATTAATTTTATTTCTACTGTTATTAATATACGGTCTATAGGTATATCTATAGATAAAGTTTCTTTATTTGTTTGATCTGTAGTTATTACAGCTGTTTTGCTTTTATTGTCTTTA	Root	Metazoa	Arthropoda	Arachnida	Araneae	Salticidae	Jotus	Jotus sp.	4521	0	0	0	0	0	0	0	0	0	0	0	0	0	0	0	0	0	0	0	0	0	0	0	0	0	0	0	0	0	0	0	0	0	0	0	0	0	0	0
ASV018	GCTGGCTTCTTTAGAAGGTCATTCGGGTAGTTCAGTTGATTTTGCTATTTTTTCTTTACATTTGGCGGGTGCTTCTTCTATTATAGGTGCAATTAATTTTATTTCTACTATTATTAATATGCGAATAAGAGGGGTAAGAATAGAAAAAGTTCCTCTTTTTGTTTGATCAGTTCTTATTACTGCTGTTTTGCTTCTTTTGTCTTTA	Root	Metazoa	Arthropoda	Arachnida	Araneae	Tetragnathidae	Tetragnatha	Tetragnatha nitens	295	0	0	0	0	0	0	0	0	0	0	0	0	0	0	0	0	0	0	0	0	151	144	0	0	0	0	0	0	0	0	0	0	0	0	0	0	0	0	0
ASV019	TTTATCTTCTTTGGATGGTCATAGAGGTAGATCTGTAGATTTCGCTATTTTTTCTTTACATTTGGCTGGAGCTTCTTCTATTATGGGAGCTGTAAATTTTATTTCTACTGTATTAAATATACGTTCATATGGAATAACAATGGAAAAAGTTCCTTTATTTGTATGATCAGTATTAATTACTGCTGTTTTATTACTATTATCTTTA	Root	Metazoa	Arthropoda	Arachnida	Araneae	Theridiidae	Cryptachaea	Cryptachaea veruculata	10540	0	0	0	0	0	0	0	0	0	0	0	0	0	0	0	0	0	0	0	0	0	0	0	0	0	0	0	0	0	0	0	0	0	0	0	0	0	0	0
ASV020	TTTATCTTCTTTAGAAGGGCATTCAGGTAGATCTGTAGATTTTGCTATTTTTTCTTTACATTTGGCTGGAGCTTCTTCAATTATAGGGGCTATTAATTTTATTTCTACTATTTTTAATATACGTTCTTATGGAATAAGAATAGAAAAGGTTTCTTTATTTGTGTGATCGGTATTAATTACTGCTGTGTTATTATTATTATCATTG	Root	Metazoa	Arthropoda	Arachnida	Araneae	Theridiidae	Enoplognatha	Enoplognatha sp. 1	492	0	0	0	0	0	0	0	0	0	0	0	0	0	0	0	0	0	0	0	0	0	0	0	0	0	0	0	0	0	0	0	0	0	0	0	0	0	0	0
ASV021	TTTGTCATCTTTAGATGGTCATGGAGGAAGATCTGTGGATTTTGCTATTTTTTCTTTACATTTAGCTGGTGCTTCTTCTATTATAGGGGCTGTTAATTTTATTTCTACTATTTTAAATATACGTTCATATGGGATGACTATAGAAAAGGTTCCTTTATTTGTTTGGTCTGTTTTAATTACTGCTGTTTTGTTACTATTATCTTTA	Root	Metazoa	Arthropoda	Arachnida	Araneae	Theridiidae	Theridion	Theridion sp.	41	0	0	0	0	0	0	0	0	0	0	0	0	0	0	0	0	0	0	0	0	0	0	0	0	0	0	0	0	0	0	0	0	0	0	0	0	0	0	0
ASV022	CTTATCCTCTTCTTTATTCCATAGAAGCCCTGCTGTAGATTTTGCTATCTTTAGACTCCATTTAGCTGGAATTTCATCAATCATAGGAGCTATTAACTTTATTTCAACTATTATCAATATACGCCCTAAAAAAATAAAATTTTCACGAATTCCTTTATTTGCTTGATCTATTTTAATTACAACCATTCTTCTTTTACTCTCTTTA	Root	Metazoa	Arthropoda	Arachnida	Mesostigmata	Phytoseiidae	Phytoseiidae sp.	Phytoseiidae sp. MF918040.1	72	0	0	0	0	0	0	0	0	0	0	0	0	0	0	0	0	0	0	0	0	0	0	0	0	0	0	0	0	0	0	0	0	0	0	0	0	0	0	0
ASV023	CTTATCCTCTTCTTTATTTCATAGAAGCCCCGCTGTAGATTTTGCTATTTTTAGGCTCCATTTAGCTGGAATTTCATCAATTATAGGAGCCATTAACTTTATTTCAACTATTATCAATATACGCCCTAAAAAAATAAAATTTTCACGAATTCCTTTATTTGCTTGATCTATTTTAATTACAACTATTCTTCTTTTACTATCTTTA	Root	Metazoa	Arthropoda	Arachnida	Mesostigmata	Phytoseiidae	Proprioseiopsis	Proprioseiopsis messor	575	0	0	0	0	0	0	0	0	0	0	0	0	0	0	0	0	0	0	0	0	0	0	0	0	0	0	0	0	0	0	0	0	0	0	0	0	0	0	0
ASV024	ATTGTCTAATTATTTATTTCATGGGGGAATTTCTGTTGATTTAACAATTTTTTCTTTACATATAGCAGGAATTTCTTCTATTTTAGGAGCTATTAATTTTATTACTACTATTTTGAATATACGAATAAAAATAATAGTTTTTGAGCGATTACCATTATTTGTTTGATCTGTATTAATTACTGCTGTATTATTACTTTTATCCTTA	Root	Metazoa	Arthropoda	Arachnida	Trombidiformes	Eupodidae	Eupodidae sp.	Eupodidae sp. MG320060.1	92	0	0	0	0	0	0	0	0	0	0	0	0	0	0	0	0	0	0	0	0	0	0	0	0	0	0	0	0	0	0	0	0	0	0	0	0	0	0	0
ASV025	ACTCGCAAGTGCTATCGCCCATGCTGGTGCATCAGTGGATTTAGCAATTTTTTCTCTACATTTAGCCGGAATTTCATCAATTTTAGGGGCAGTAAACTTTATTTCAACAATTATTAATATAAAACCAACATTTATAAAACCTGAACAAATCCCATTGTTTGTATGAGCAGTTGGTATTACAGCTTTATTACTTTTATTATCTCTA	Root	Metazoa	Arthropoda	Insecta	Blattodea	Ectobiidae	Balta	Balta scripta	27	0	0	0	0	0	0	0	0	0	0	0	0	0	0	0	0	0	0	0	0	0	0	0	0	0	0	0	0	0	0	0	0	0	0	0	0	0	0	0
ASV026	TCTTTCAGCTAATATTGCACACAGAGGATCTTCTGTAGATTTAGCAATTTTTAGTCTTCACTTAGCAGGGATTTCATCAATTCTAGGTGCAGTAAATTTTATTACCACAGTAATCAATATACGACCAGCAGGAATAACATTTGATCGTATACCTTTATTTGTATGAGCTGTAGTTATTACAGCAGTTCTTCTTCTCTTATCTCTT	Root	Metazoa	Arthropoda	Insecta	Coleoptera	Anthicidae	Anthicidae sp.	Anthicidae sp. 1	1309	1	0	0	0	0	0	0	612	615	0	0	0	5	9	0	0	0	0	0	0	0	0	0	0	0	0	0	0	0	0	0	0	0	0	0	0	0	4	0
ASV027	CCTATCAGCAAATATTGCTCATAGAGGATCATCAGTTGATTTAGCTATTTTTAGACTACACTTAGCTGGTGTCTCATCAATTCTTGGTGCTGTAAACTTCATTACTACAGTAATCAATATACGACCTATCGGAATAAATTTAGATCGAATACCTCTATTCGTATGAGCTGTAGTAATTACAGCAGTATTATTACTTTTATCCCTA	Root	Metazoa	Arthropoda	Insecta	Coleoptera	Anthicidae	Anthicidae sp.	Anthicidae sp. 2	173	0	0	0	0	0	0	0	0	0	0	0	0	0	0	0	0	0	0	0	0	0	0	0	0	0	0	0	0	0	0	0	0	0	0	0	0	0	14	0
ASV028	TCTGTCAGCAGGAATTGCCCACAGAGGAGCATCTGTTGATTTAGCTATTTTTAGATTACATTTAGCAGGAATTTCTTCAATTTTAGGAGCTGTAAATTTTATTACAACTATTATTAATATACGATCAGTTGGGATAACATTTGATCGAATACCTTTATTTGTTTGATCTGTAGGAATTACTGCTTTATTACTTTTATTATCTTTA	Root	Metazoa	Arthropoda	Insecta	Coleoptera	Carabidae	Carabidae sp.	Carabidae sp.	241	0	0	0	0	0	0	0	0	0	0	0	0	0	0	0	0	0	0	0	0	0	0	0	0	0	0	0	0	0	0	0	0	0	0	0	0	0	0	0
ASV029	ATTATCTTCAGGTATTGCTCATAGAGGAGCTTCAGTAGATTTAGCAATTTTTAGCTTACATTTAGCCGGAGTTTCTTCAATTTTAGGAGCTGTAAATTTTATTACTACAATTATTAATATACGATCTGTAGGAATAACATTTGATCGAATACCATTATTTGTTTGATCAGTTGGAATTACTGCTTTATTATTACTTTTATCATTA	Root	Metazoa	Arthropoda	Insecta	Coleoptera	Carabidae	Mecyclothorax	Mecyclothorax ambiguus	353	0	0	0	0	0	0	0	0	0	0	0	0	0	0	0	0	0	0	0	0	0	0	0	0	0	0	0	0	0	0	0	0	0	0	0	0	0	0	0
ASV030	CTTATCTTCAAACATTGCCCATGGTGGATCCTCTGTTGATTTAGCAATTTTTAGGCTTCATTTAGCAGGAATTTCTTCAATGTTAGGAGCAATTAATTTTATTACAACTGTTATTAATATACGCCCTAAAGGTATAACCTTAGATCGAATACCATTATTTGTATGAGCAGTAGTAATTACAGCAATTTTATTACTTCTATCTTTA	Root	Metazoa	Arthropoda	Insecta	Coleoptera	Chrysomelidae	Chrysomelidae sp.	Chrysomelidae sp. 1	198	0	0	0	0	0	0	0	116	82	0	0	0	0	0	0	0	0	0	0	0	0	0	0	0	0	0	0	0	0	0	0	0	0	0	0	0	0	0	0
ASV031	TTTATCATCTAATATTGCTCATGGAGGTTCATCTGTTGATTTAGCTATTTTTAGATTACATCTAGCCGGTATTTCATCAATTTTAGGTGCAATTAATTTTATTACAACTGTAATTAATATACAACCTGAAGGAATGACCTTAGACCGAATACCTTTATTTGTATGAGCAGTTGTAATCACTGCAATTTTATTACTTTTATCTTTA	Root	Metazoa	Arthropoda	Insecta	Coleoptera	Chrysomelidae	Chrysomelidae sp.	Chrysomelidae sp. 2	202	0	0	0	0	0	0	0	0	0	0	0	0	0	0	0	0	0	0	0	0	0	0	0	0	0	0	0	0	0	0	0	0	0	0	0	0	0	0	0
ASV032	TCTTTCTGCAGCTATTGCTCATAGTGGGGCTTCAGTTGATTTAGCTATTTTCTCTTTACATTTAGCAGGTGTTTCTTCAATTTTAGGTTCAGTAAATTTTATTACTACAGTTATTAATATACGAGCAAACGGAATTACTTTAGATCGAATACCTTTATTTGTTTGATCTGTTGTTATTACAACTGTTCTATTATTACTTTCTCTA	Root	Metazoa	Arthropoda	Insecta	Coleoptera	Cleridae	Opilo	Opilo whitei	111015	0	0	0	0	0	0	0	0	0	0	0	0	0	0	0	0	0	0	0	0	0	0	0	0	0	0	0	0	0	0	0	0	0	0	0	0	0	0	0
ASV033	TTTATCTTCAAATTTAGCACATAATGGACCTTCCGTGGACTTAGTAATTTTTAGATTACATTTAGCAGGAATTTCCTCTATTTTAGGGGCTGTAAATTTTATTTCAACAATTATAAATATACGGCCATTTGGAATAAATTTAGATAAAACCCCTCTATTTGTTTGATCAGTTTTAATTACAGCAATTTTATTACTTTTATCATTA	Root	Metazoa	Arthropoda	Insecta	Coleoptera	Coccinellidae	Coccinella	Coccinella transversalis	7163	0	0	0	0	0	0	0	0	0	0	0	0	0	0	0	0	0	0	0	0	0	0	0	0	0	0	0	0	0	0	0	0	0	0	0	0	0	0	0
ASV034	TCTTTCATCTAACTTAGCTCATAATGGACCCTCTGTTGATTTAGTGATTTTTAGTTTACATTTAGCAGGAATTTCCTCTATTTTAGGAGCAGTAAATTTTATTTCTACTATTATAAATATACGACCATATGGAATAAGTTTAGATAAAACCCCTCTCTTTGTGTGATCTGTTTTAATTACAGCAATTTTATTACTCTTATCACTT	Root	Metazoa	Arthropoda	Insecta	Coleoptera	Coccinellidae	Hippodamia	Hippodamia variegata	71	0	0	0	0	0	0	0	0	0	0	0	0	0	0	0	0	0	0	0	0	0	0	0	0	0	0	0	0	0	0	0	0	0	0	0	0	0	0	0
ASV035	ATTATCTTCAAATATTGCCCATAATGGTTCATCTGTAGATTTAGCTATTTTTAGTTTACATTTAGCTGGAATTTCTTCAATTTTAGGGGCAATTAATTTTATTACAACAATTATTAATATACGCCCTTTAGGAATAAAGTTTGAACAAATACCTTTATTTGTTTGATCAGTTCTATTAACTGCTATTTTACTTCTTCTTTCACTT	Root	Metazoa	Arthropoda	Insecta	Coleoptera	Coccinellidae	Rhyzobius	Rhyzobius lophanthae	220	0	0	0	0	0	0	0	0	0	0	0	0	0	0	0	0	0	0	0	0	0	0	0	0	0	0	0	0	0	0	0	0	0	0	0	0	0	0	0
ASV036	CTGTCATCTAATATTGCCCATAGTGGATCCTCTGTAGATTTAGCTATTTTTAGTCTTCATTTAGCAGGAATCTCTTCAATTCTAGGAGCTGTAAATTTTATCTCTACAATTATTAATATGCGGTCAATTGGTATATCATTTGACCGAATACCCCTATTTGTCTGATCAGTTAATATTACTGCTATTTTATTATTATTATCTTTA	Root	Metazoa	Arthropoda	Insecta	Coleoptera	Coleoptera sp.	Coleoptera sp.	Coleoptera sp. 1	809	0	0	0	0	0	0	0	0	0	0	0	0	0	51	0	0	0	0	0	0	0	0	0	0	0	0	0	0	0	0	0	0	0	0	0	0	0	0	0
ASV037	CCTTTCATCAAATATTGCTCATGGAGGATCATCTGTTGATTTAGCAATTTTTAGACTTCATTTAGCAGGAATCTCTTCAATTTTAGGAGCAATTAATTTTATCACAACAGTAATTAATATACGACCCTATGGTATAACATTAGATCGAATACCCCTTTTTGTATGAGCAGTAGTAATTACTGCCATCTTATTATTATTATCTCTA	Root	Metazoa	Arthropoda	Insecta	Coleoptera	Coleoptera sp.	Coleoptera sp.	Coleoptera sp. 10	86	0	0	0	0	0	0	0	0	0	0	0	0	0	0	0	0	0	0	0	0	0	0	0	0	0	0	0	0	0	0	0	0	0	0	0	0	0	0	0
ASV038	TCTATCTTCTAATATCGCTCATAGAGGATCCTCGGTTGATTTAGCTATTTTTAGTTTACATTTAGCAGGTATTTCATCAATTTTAGGAGCTGTAAATTTTATTTCAACAATTATTAATATACGATCTAGAGGAATAAGATTTGATCGAATGCCATTATTCGTTTGATCTGTGAATATTACAGCTATTTTATTATTACTATCTTTA	Root	Metazoa	Arthropoda	Insecta	Coleoptera	Coleoptera sp.	Coleoptera sp.	Coleoptera sp. 11	81	0	0	0	0	0	0	0	0	0	0	0	0	0	0	0	0	0	0	0	0	0	0	0	0	0	0	0	0	0	0	0	0	0	0	0	0	0	77	0
ASV039	TTTAGCATCAAATCTAGCTCATAATGGATCTTCTGTAGATCTAGCAATTTTTAGACTTCACTTAGCTGGAGTGTCTTCTATTTTAGGTGCTGTAAATTTTATTACTACAGTTATTAATATACGACCTAAAGGAATACTTTTTGAACGAATACCATTATTTGTATGAGCAGTAGTAATTACTGCTATTTTATTATTATTATCTTTA	Root	Metazoa	Arthropoda	Insecta	Coleoptera	Coleoptera sp.	Coleoptera sp.	Coleoptera sp. 12	62	0	0	0	0	0	0	0	0	0	0	0	0	0	0	0	0	0	0	0	0	0	0	0	0	0	0	0	0	0	0	0	0	0	0	0	0	0	0	0
ASV040	ATTATCATCTAATATTGCCCATGGAGGATCTTCAGTCGATTTGGCTATCTTTAGTCTTCATTTAGCAGGAATTTCTTCTATTTTAGGCGCAGTAAATTTTATTTCTACTGTAATTAATATACGATCCCCAGGAATTTCTTTTGATCGAATACCTTTATTTGTTTGATCCGTTGCAATCACAGCATTACTTTTACTATTATCACTT	Root	Metazoa	Arthropoda	Insecta	Coleoptera	Coleoptera sp.	Coleoptera sp.	Coleoptera sp. 13	51	0	0	0	0	0	0	0	0	0	0	0	0	0	0	0	0	0	0	0	0	0	0	0	0	0	0	0	0	0	0	0	0	0	0	0	0	0	30	0
ASV041	CCTATCTTCTAATATTGCCCATAATGGAGCCTCAGTAGATTTAACAATTTTTAGATTACATTTAGCTGGAATTTCTTCAATTTTAGGAGCAGTAAATTTTATTTCTACAGTAATTAATATACGAACAACTGGAATTATTTTAGATCGAATACCTTTATTTGTATGATCTGTAGTAATTACCGCAATTTTACTATTATTGTCTTTA	Root	Metazoa	Arthropoda	Insecta	Coleoptera	Coleoptera sp.	Coleoptera sp.	Coleoptera sp. 14	46	0	0	0	0	0	0	0	0	0	0	0	0	0	0	0	0	0	0	0	0	0	0	0	0	0	0	0	0	0	0	0	0	0	0	0	0	0	0	0
ASV042	ATTATCAAGAAATATTGCCCATGGAGGTTCATCAGTAGACTTAGCTATTTTTAGCCTACATTTGGCAGGAATTTCCTCAATTTTAGGAGCTGTAAATTTCATTACAACTGTAATTAATATACGACCTACTGGAATAAGATTGGATCAAATACCTCTTTTTGTTTGATCTGTAGTAATTACAGCAATTCTCTTATTATTATCTTTA	Root	Metazoa	Arthropoda	Insecta	Coleoptera	Coleoptera sp.	Coleoptera sp.	Coleoptera sp. 2	299	0	0	0	0	0	0	0	0	0	0	0	0	0	0	0	0	0	0	0	0	0	0	0	0	0	0	0	0	0	0	0	0	0	0	0	0	0	0	0
ASV043	CTTATCTTCAAATATTGCCCATGGAGGATCTTCTGTAGATTTAGCTATTTTTAGATTACACTTAGCCGGAATCTCATCAATCCTAGGAGCAATTAATTTCATTACAACAGTAATTAATATACGACCTAGAGGTATAACATTAGACCGTATGCCCTTATTTGTTTGAGCTGTTGTAATTACTGCCATATTATTATTGTTATCTTTA	Root	Metazoa	Arthropoda	Insecta	Coleoptera	Coleoptera sp.	Coleoptera sp.	Coleoptera sp. 3	19226	0	0	0	0	0	0	0	0	0	0	0	0	0	0	0	0	0	0	0	0	0	0	0	0	0	0	0	0	0	0	0	0	0	0	0	0	0	0	0
ASV044	CTTATCTTCAAATATTGCCCATGGAGGATCTTCTCTAGATTTAGCTATTTTTAGATTACACTTAGCTGGAATTTCATCAATTCTAGGAGCAATTAATTTCATTACAACAGTAATTAATATACGACCTAGGGGTATAACATTAGACCGTATACCCTTATTTGTTTGAGCTGTTGTAATTACCGCCGTATTATTATTATTATCTTTA	Root	Metazoa	Arthropoda	Insecta	Coleoptera	Coleoptera sp.	Coleoptera sp.	Coleoptera sp. 4	1036	0	0	0	0	0	0	0	0	0	0	0	0	0	0	0	0	0	0	0	0	0	0	0	0	0	0	0	0	0	0	0	0	0	0	0	0	0	0	0
ASV045	ACTTTCTTCTAATATTTCCCATGCTGGAGCATCTGTTGATTTAACAATCTTTAGCCTTCACTTAGCAGGTATCTCTTCTATTTTAGGTGCTATTAATTTTATTACAACAGTAATTAATATACGACCTAAAGGTATAACATTTGATCGAATACCTTTATTCGTTTGAGCTGTTTTAATTACAGCTATTCTTCTCCTCCTTTCATTA	Root	Metazoa	Arthropoda	Insecta	Coleoptera	Coleoptera sp.	Coleoptera sp.	Coleoptera sp. 5	440	0	0	0	0	0	0	0	0	0	440	0	0	0	0	0	0	0	0	0	0	0	0	0	0	0	0	0	0	0	0	0	0	0	0	0	0	0	0	0
ASV046	TTTATCAAGAAACATCGCCCATGGAGGATCTTCTGTAGATTTAGCTATTTTTAGTCTTCATCTAGCAGGTATTTCTTCTATTTTAGGAGCTGTAAATTTTATTACTACTGTTATTAATATACGTCCAGCTGGAATATCTCTTGATCAAATACCTTTATTTGTTTGATCTGTAGTAATTACAGCAATTCTTTTACTTTTATCCTTA	Root	Metazoa	Arthropoda	Insecta	Coleoptera	Coleoptera sp.	Coleoptera sp.	Coleoptera sp. 6	135	0	0	0	0	0	0	0	0	0	0	0	0	0	0	0	0	0	0	0	0	0	0	0	0	0	0	0	0	0	0	0	0	0	0	0	0	0	0	82
ASV047	TTTATCAAGAAATATTGCCCATAGAGGATCATCAGTAGATTTAGCTATTTTTAGACTTCATTTAGCAGGTATCTCATCAATTCTAGGAGCCGTAAATTTTATTACAACAGTTATTAATATACGACCTGAAGGAATAACTCCAGAAAAAATACCTCTATTTGTTTGATCAGTTGTCATTACAGCAGTTCTTCTTTTACTTTCTCTA	Root	Metazoa	Arthropoda	Insecta	Coleoptera	Coleoptera sp.	Coleoptera sp.	Coleoptera sp. 7	120	0	0	0	0	0	0	0	0	0	0	0	0	0	0	0	0	0	0	0	0	0	0	0	0	0	0	0	0	0	0	0	0	0	0	0	0	0	0	0
ASV048	CCTTTCATCTAACATTGCACATGGAGGATCTTCTGTTGATTTAGCCATTTTTAGACTTCATTTAGCTGGAATTTCTTCAATTTTAGGTGCAGTAAATTTCATTTCTACTGTAATTAATATACGAACTGTTGGAATTTCTTTTGATCGAATACCCCTTTTTGTTTGATCTGTAGCTATTACTGCCTTACTGCTCCTATTATCTTTA	Root	Metazoa	Arthropoda	Insecta	Coleoptera	Coleoptera sp.	Coleoptera sp.	Coleoptera sp. 8	97	0	0	0	0	0	0	0	0	0	0	0	0	0	0	0	0	0	0	0	0	0	0	0	0	0	0	0	0	0	0	0	0	0	0	0	0	0	0	0
ASV049	TTTATCAAGAAATATTGCCCATAGAGGATCATCAGTAGATTTAGCTATTTTTAGACTCCATTTAGCAGGTATCTCATCAATTCTAGGAGCCGTAAATTTTATTACAACAATTATTAATATACGACCTGAAGGAATAACTCCAGAAAAAATACCTCTATTTGTTTGATCAGTTGTCATTACAGCAGTTCTTCTTTTACTTTCTCTA	Root	Metazoa	Arthropoda	Insecta	Coleoptera	Coleoptera sp.	Coleoptera sp.	Coleoptera sp. 9	88	0	0	0	0	0	0	0	0	0	0	0	0	0	0	0	0	0	0	0	0	0	0	0	0	0	0	0	0	0	0	0	0	0	0	0	0	0	0	0
ASV050	TTTATCTTCTAATATTGCCCATGGAGGTGCTTCAGTTGATTTAGCTATTTTTAGTTTACATTTAGCTGGTATTTCATCAATTTTAGGTGCTATTAATTTTATTTCTACTATTTTAAATATACGTCCTGCTGGAATAAATTTTGAACAAATACCTCTTTTTGTTTGATCAGTTTTATTTACAGCTATTTTATTATTATTATCTTTA	Root	Metazoa	Arthropoda	Insecta	Coleoptera	Corylophidae	Sericoderus	Sericoderus lateralis	6769	0	0	0	0	0	0	0	588	530	0	2	0	6	3	0	0	0	0	0	0	46	40	0	0	12	15	0	0	0	0	0	0	0	0	0	0	0	65	0
ASV051	ATTATCAACAAATATTGCTCATGAAGGAGCTTCTATTGATTTAGCAATTTTTAGATTACATATAGCAGGAATTTCATCAATTCTTGGAGCAATTAATTTTATTTCTACAGTAATTAATATACATTCTTCTGGAATAAAATTAGATCAAATATCCCTATTTGTCTGAGCTGTAAAAATTACCGCTATCCTTCTTCTTCTTTCTCTT	Root	Metazoa	Arthropoda	Insecta	Coleoptera	Curculionidae	Cosmobaris sp.	Cosmobaris sp.	251	0	0	0	0	0	0	0	0	0	0	0	0	0	0	0	0	0	0	0	0	0	0	0	0	0	0	0	0	0	0	0	0	0	0	0	0	0	0	0
ASV052	CCTATCTTCAGGTATTGCTCATGGGGGAGCATCAGTAGATTTAGCTATTTTTAGTCTACATTTAGCTGGTATTTCTTCAATTTTAGGAGCTGTAAATTTTATTACAACAATTATTAATATACGATCAGTTGGGATAACATTTGATCGAATACCTTTATTTGTTTGATCAGTAGGAATTACAGCATTATTATTATTACTATCATTG	Root	Metazoa	Arthropoda	Insecta	Coleoptera	Dytiscidae	Allodessus	Allodessus sp. KP697592.1	148	0	0	0	0	0	0	0	0	0	0	0	0	0	0	0	0	0	0	0	0	0	0	0	0	0	0	0	0	6	0	0	0	0	0	0	0	0	0	0
ASV053	ACTATCATCTAATATTGCCCATGGAGGATCTTCAGTAGATTTAGCTATTTTTAGTTTACATTTAGCAGGAATTTCCTCAATTCTTGGTGCAGTAAATTTTATTTCTACAGTAATTAATATACGAGCATCAGGAATTACATTTGATCGAATACCTCTTTTTGTTTGATCTGTAGCTATTACTGCTCTTCTTTTATTATTATCCTTA	Root	Metazoa	Arthropoda	Insecta	Coleoptera	Elateridae	Elateridae sp.	Elateridae sp.	6213	0	0	0	0	0	0	0	0	0	0	0	0	0	0	0	0	0	0	0	0	0	0	0	0	0	0	0	0	0	1	0	0	0	0	0	0	0	0	0
ASV054	TCTATCTTCTAATATTGCTCATGGAGGTGCTTCTGTAGATTTAGCTATTTTTAGTCTTCATTTAGCTGGTATTTCATCAATTTTAGGAGCAGTAAATTTTATTACTACAGTAATTAATATACGTTCAATTGGAATAACATTTGACCGAATGCCTTTATTTGTTTGAGCTGTAGCTATTACAGCACTTTTATTACTTCTTTCTTTA	Root	Metazoa	Arthropoda	Insecta	Coleoptera	Hydraenidae	Hydraenidae sp.	Hydraenidae sp. KX198756.1	949	0	0	0	0	0	0	0	0	0	0	0	0	0	0	0	0	0	0	0	0	0	0	0	0	0	0	0	0	0	0	0	0	0	0	0	0	0	0	0
ASV055	CCTATCTTCTAATATTGCTCATGGAGGATCTTCAGTAGATTTAGCTATTTTTAGTCTCCATCTAGCAGGAATCTCTTCAATTTTAGGAGCAGTAAATTTTATTTCTACAGTTATTAATATACGCCCTCAAGGTATAACCCTTGAACGAATGCCTTTATTTGTTTGAGCCGTTGTAATTACTGCTATTTTACTTCTTTTATCACTT	Root	Metazoa	Arthropoda	Insecta	Coleoptera	Laemophloeidae	Cryptolestes	Cryptolestes ferrugineus	333	0	0	0	0	0	0	0	0	0	0	0	0	0	0	0	0	0	0	0	0	0	0	0	0	0	0	0	0	0	0	0	0	0	0	0	0	0	0	0
ASV056	ACTTTCAAGAAATATTGCACATGGAGGTTCATCTGTTGATTTAGCTATTTTTAGTTTACATTTAGCAGGGATTTCTTCAATTTTAGGAGCTGTAAATTTTATTACAACAGTAATTAACATACGACCAGCTGGGATAGCTCTTGATCAAATACCTTTATTTGTTTGATCAGTAGTTATTACTGCTATTTTATTACTACTATCTTTA	Root	Metazoa	Arthropoda	Insecta	Coleoptera	Latridiidae	Latridiidae sp.	Latridiidae sp. 2	4420	0	0	0	0	0	0	0	282	297	0	0	0	8	16	414	464	0	0	0	0	0	0	0	0	19	21	0	0	0	0	0	0	0	0	0	0	0	0	0
ASV057	ATTATCTAGAAATATTGCTCATGGGGGATCTTCAGTTGATTTAGCTATTTTTAGATTACATTTAGCTGGAATTTCTTCAATTTTAGGAGCTGTAAATTTTATTACTACAGTAATTAATATACGACCAGCTGGTATATCATTAGATCAAATACCTTTATTTGTTTGATCAGTTGTTATTACAGCTATTTTATTATTATTATCATTA	Root	Metazoa	Arthropoda	Insecta	Coleoptera	Latridiidae	Latridiidae sp.	Latridiidae sp. 2	91	0	0	0	0	0	0	0	12	14	0	0	0	0	0	0	0	0	0	0	0	0	0	0	0	0	2	1	59	0	0	0	0	0	0	0	0	0	0	0
ASV058	TCTTTCTTCAAATATCGCTCATGGAGGAGCATCTGTTGATTTAGCAATTTTTAGACTACATTTAGCAGGTATTTCATCTATTTTAGGAGCAGTTAATTTTATTTCAACTGTTATTAATATACGTTCAATTGGTATTACATTTGATCGAATACCACTTTTTGTTTGATCTGTAGCAATTACAGCTTTATTACTTCTCCTTTCCCTG	Root	Metazoa	Arthropoda	Insecta	Coleoptera	Staphylinidae	Dalotia	Dalotia coriaria	11	0	0	0	0	0	0	0	0	0	0	0	0	0	0	0	0	0	0	0	0	0	0	0	0	0	0	0	0	0	0	0	0	0	0	0	0	0	0	0
ASV059	TTTATCTTCTAATATTGCTCATAGAGGAGCTTCAGTTGATTTAACAATTTTTAGATTACATATAGCCGGAATTTCTTCTATTTTAGGAGCTATTAATTTTATCACTACTATTTTAAATATACACCCTTCAAGAATAATATATGATCAAATACCTCTATTTGTTTGATCAGTAGGAATTACTGCACTCTTATTATTATTATCATTA	Root	Metazoa	Arthropoda	Insecta	Coleoptera	Staphylinidae	Oligota	Oligota sp.	199	0	0	0	0	0	0	0	0	0	0	0	0	0	0	0	0	0	0	0	0	0	0	0	0	0	0	0	11	0	0	0	0	0	0	0	0	0	0	0
ASV060	ATTATCATCAAATATTGCTCATGGAGGATCATCAGTAGATTTAGCAATTTTTAGTCTACATTTAGCAGGAATTTCATCAATTCTAGGAGCTGTAAATTTTATCTCTACAGTAATTAATATACGTTCATTTGGAATTACCTTTGATCGAATACCTTTATTTGTATGGTCTGTAGCAATTACAGCTTTATTATTACTTTTATCACTT	Root	Metazoa	Arthropoda	Insecta	Coleoptera	Staphylinidae	Staphylinidae sp.	Staphylinidae sp. 1	1065	0	0	0	0	0	0	0	0	0	0	0	0	0	0	0	0	0	0	0	0	210	187	0	0	0	0	0	0	2	1	0	0	0	0	0	0	0	0	0
ASV061	TCTGTCATCTAATATTGCTCATGGTGGTTCTTCTGTTGATTTAGCTATTTTTAGTCTTCATTTAGCTGGTATTTCATCAATTTTAGGAGCAGTAAATTTTATTACTACAGTAATCAATATACGATCAACAGGAATAACCTTTGATCGAATACCTTTATTTGTTTGATCTGTTGCAATTACAGCATTATTACTTTTACTTTCTCTT	Root	Metazoa	Arthropoda	Insecta	Coleoptera	Staphylinidae	Staphylinidae sp.	Staphylinidae sp. 2	434	0	0	0	0	0	0	0	0	0	0	0	0	0	0	0	0	0	0	0	0	0	0	0	0	0	0	0	0	0	0	0	0	0	0	0	0	0	0	0
ASV062	ACTTTCATCTAATATTGCCCATAGAGGAGCATCAGTAGATTTAGCTATTTTTAGTTTACATTTAGCAGGAATTTCATCAATTTTAGGAGCAGTAAATTTTATTACAACAGTAATTAATATACGACCAATAGAAATAACCTTTGATCGAATACCTTTGTTTGTTTGATCAGTTGTTATTACAGCTCTTTTACTTCTATTATCATTA	Root	Metazoa	Arthropoda	Insecta	Coleoptera	Staphylinidae	Staphylinidae sp.	Staphylinidae sp. 3	2787	0	0	0	0	0	0	0	93	116	0	0	0	0	0	0	0	0	0	0	0	0	0	0	0	0	0	0	0	0	0	0	0	21	0	3	0	0	0	0
ASV063	CCTATCTTCGAATATTGCTCATGGAGGAGCCTCTGTAGATTTAGCAATTTTTAGATTACATCTAGCTGGAATTTCTTCTATCTTAGGTGCAGTAAATTTTATTTCAACTGTAATTAATATACGATCAACAGGTATCACCTTTGACCGAATACCTTTATTTGTATGATCAGTTGCAATTACTGCCCTATTACTTCTTCTTTCTTTA	Root	Metazoa	Arthropoda	Insecta	Coleoptera	Staphylinidae	Staphylinidae sp.	Staphylinidae sp. 4	142	0	0	0	0	0	0	0	0	0	0	0	0	0	0	0	0	0	0	0	0	0	0	0	0	0	0	0	0	0	0	0	0	0	0	0	0	0	0	0
ASV064	TTTATCTTCAAATATTGCTCATGGTGGCTCTTCTGTTGATTTAGCAATTTTTAGGCTTCATCTAGCAGGAATTTCATCAATTTTAGGTGCTGTAAATTTTATTTCAACCATTATTAATATACGAACATCAGGTATAAGATTTGATCGTATGCCTTTATTTGTATGATCAGTTGCAATTACAGCTTTATTATTACTTTTATCCTTA	Root	Metazoa	Arthropoda	Insecta	Coleoptera	Staphylinidae	Staphylinidae sp.	Staphylinidae sp. 5	96	0	0	0	0	0	0	0	0	0	0	0	0	0	0	0	0	0	0	0	0	0	0	0	0	0	0	0	0	0	0	0	0	0	0	0	0	0	5	0
ASV065	TTTATCTTCAAATATTGCCCATGGTGGATCATCTGTAGATTTAGCAATTTTCAGACTTCATTTAGCAGGAATTTCATCAATTTTAGGAGCTGTAAATTTTATTTCTACAATTATTAATATACGAACAGCTGGAATAAGATTTGATCGAATACCTTTATTTGTTTGATCAGTTGCTATTACTGCTTTATTATTACTTTTATCTTTA	Root	Metazoa	Arthropoda	Insecta	Coleoptera	Staphylinidae	Staphylinidae sp.	Staphylinidae sp. 6	18912	0	0	0	0	0	0	0	0	0	0	11848	7064	0	0	0	0	0	0	0	0	0	0	0	0	0	0	0	0	0	0	0	0	0	0	0	0	0	0	0
ASV066	TTTATCATCAGTAATTGCTCATGGAGGAGCTTCTGTAGATTTAGCTATTTTTTCTCTTCACTTAGCCGGAATTTCTTCTATTTTAGGAGCAGTAAATTTTATTACAACTATTATTAATATACGATCTACTGGAATTACTTTTGATCGAATACCTTTGTTTGTATGATCTGTATTTATTACAGCATTTTTATTATTATTATCTCTT	Root	Metazoa	Arthropoda	Insecta	Diptera	Agromyzidae	Agromyzidae sp.	Agromyzidae sp. 1	239	0	0	0	0	0	0	0	0	0	0	0	0	0	0	0	0	0	0	0	0	0	0	0	0	0	0	0	0	0	0	0	0	0	0	0	0	0	0	0
ASV067	TCTTTCTTCTATTATTGCCCATGGAGGAGCTTCAGTTGATTTAGCAATTTTTTCCCTCCATCTTGCAGGAATTTCTTCAATTTTAGGGGCAGTAAATTTTATTACAACAATTATTAATATACGATCAACAGGAATTAATTTTGATCGAATACCTTTATTTGTTTGATCAGTTTTTATTACTGCAATTTTATTACTTCTTTCTCTT	Root	Metazoa	Arthropoda	Insecta	Diptera	Agromyzidae	Agromyzidae sp.	Agromyzidae sp. 2	514	0	0	0	0	0	0	0	0	0	0	0	0	0	0	0	0	0	0	0	0	0	0	0	0	0	0	0	0	0	0	0	0	0	0	0	0	0	0	0
ASV068	TCTCTCTTCTATTATTGCACATGGTGGCTCATCGGTTGATTTAGCAATTTTTTCTCTACATCTAGCAGGAATTTCATCAATTTTAGGAGCAGTAAATTTCATTACAACAATTATTAATATACGATCTACAGGAATTAGCTTTGATCGAATACCCTTATTTGTTTGATCAGTTTTTATTACTGCTATTTTATTACTTCTTTCTCTT	Root	Metazoa	Arthropoda	Insecta	Diptera	Agromyzidae	Agromyzidae sp.	Agromyzidae sp. 3	48	0	0	0	0	0	0	0	0	0	0	0	0	0	0	0	0	0	0	0	0	0	0	0	0	0	0	0	0	0	0	0	0	0	0	0	0	0	0	0
ASV069	TTTATCATCTATCATCGCTCATGGTGGAGCTTCTGTAGACTTAGCAATTTTTTCCTTACATTTAGCAGGAGCTTCTTCTATTTTAGGTGCAGTAAATTTTATTACTACAATTATTAATATACGATCTTCAGGGATTACTTTTGATCGTATACCACTATTTGTTTGATCAGTATTAATTACTGCAGTTTTATTACTTTTATCATTA	Root	Metazoa	Arthropoda	Insecta	Diptera	Agromyzidae	Cerodontha	Cerodontha milleri	1655	0	0	0	0	0	0	0	0	0	0	0	0	0	0	0	0	0	0	0	0	0	0	0	0	0	0	0	0	1	2	0	0	0	0	0	0	0	0	0
ASV070	TCTTTCTTCTATTATTGCTCATGGAGGAGCATCTGTTGACTTAGCAATTTTTTCTCTTCATTTAGCCGGAATTTCTTCAATTTTAGGAGCCGTAAATTTTATTACAACTATTATTAATATACGATCTACTGGAATTACTTTTGACCGAATACCATTATTTGTATGATCAGTTTTTATTACTGCAATTTTATTACTTCTTTCATTA	Root	Metazoa	Arthropoda	Insecta	Diptera	Agromyzidae	Cerodontha	Cerodontha sp.	66	0	0	0	0	0	0	0	0	0	0	0	0	0	0	0	0	0	0	0	0	0	0	0	0	0	0	0	0	0	0	0	0	0	0	0	0	0	0	0
ASV071	CCTCTCTTCTATTATTGCTCACGGTGGGGCATCTGTTGATCTAGCTATTTTTTCATTACACCTTGCAGGAATTTCTAGAATTTTAGGAGCAGTAAATTTTATTACAACAATTATTAATATGCGATCTACAGGAATTAGATTTGATCGAATACCTTTATTTGTTTGATCTGTTCTTATTACTGCTATCTTATTACTTTTATCTTTA	Root	Metazoa	Arthropoda	Insecta	Diptera	Agromyzidae	Liriomyza	Liriomyza brassicae	492	0	0	0	0	0	0	0	0	0	0	0	0	0	0	0	0	0	0	0	0	0	0	0	0	0	0	0	0	0	0	0	0	0	0	0	0	0	0	0
ASV072	GCTTTCATCAATTATTGCACATGGGGGAGCTTCAGTAGACTTAGCTATTTTTTCTTTACACTTAGCTGGAATTTCTTCTATTTTAGGAGCTGTAAATTTTATTACAACTATTATTAATATACGATCAACAGGAATTAGTTTCGATCGAATACCTTTATTTGTTTGATCAGTATTAATTACTGCAGTATTATTATTACTTTCTCTA	Root	Metazoa	Arthropoda	Insecta	Diptera	Agromyzidae	Liriomyza	Liriomyza chenopodii	4099	0	0	0	0	0	0	0	0	0	0	0	0	0	0	0	0	0	0	0	0	0	0	0	0	0	0	0	0	0	0	0	0	0	0	0	0	0	0	0
ASV073	TTTATCTTCAGTGATTGCTCATGGGGGAGCTTCAGTAGATTTAGCTATTTTTTCACTTCATTTAGCCGGGATTTCTTCAATTTTAGGAGCAGTAAATTTTATTACAACTATTATTAACATACGATCAGTAGGAATTTCTTTTGACCGAATACCATTATTTGTGTGATCAGTTTTAATTACTGCTGTTCTATTACTTCTTTCATTA	Root	Metazoa	Arthropoda	Insecta	Diptera	Agromyzidae	Phytomyza	Phytomyza syngenesiae	494551	0	1	0	0	0	3	4	17021	15731	8184	6	1	0	0	3058	3130	0	0	0	0	17155	15258	6	0	0	0	3308	29962	32965	41910	63596	48680	0	10466	8589	12767	15209	948	0
ASV074	ATTATCTTCAGTAATTGCCCATGGAGGTAGATCAGTAGATCTAGCAATTTTTTCTTTACATTTAGCAGGAGTATCCTCTATTTTAGGAGCTGTAAATTTTATTACAACAATTATTAATATACGATCAACAGGAATTACTTTTGATCGAATACCATTATTTGTATGATCAGTATTAATTACTGCTGTTTTATTATTATTATCTTTA	Root	Metazoa	Arthropoda	Insecta	Diptera	Agromyzidae	Pseudonapomyza	Pseudonapomyza sp.	2583	0	0	0	0	0	0	0	0	0	0	0	0	0	0	0	0	0	0	0	0	0	0	0	0	0	0	0	0	0	0	0	0	0	0	0	0	0	0	0
ASV075	TTTATCTTCAGTAATTGCCCATGGTGGGAGCTCAGTAGATTTAGCTATTTTTTCTTTACATTTAGCCGGAGTTTCATCAATTTTAGGAGCAGTAAATTTTATTACTACTATTATTAATATACGATCAACAGGAATTACTTTTGACCGAATACCATTATTTGTTTGATCTGTATTAATTACAGCAGTATTATTATTATTATCTTTA	Root	Metazoa	Arthropoda	Insecta	Diptera	Agromyzidae	Pseudonapomyza	Pseudonapomyza sp. EF104731.1	47	0	0	0	0	0	0	0	0	0	0	0	0	0	0	0	0	0	0	0	0	0	0	0	0	0	0	0	0	0	0	0	0	0	0	0	0	0	0	0
ASV076	TTTATCTTCTAATATCGCTCATGGAGGAGCTTCTGTTGATTTAGCAATTTTTTCTCTTCATTTAGCAGGAATTTCTTCAATTTTAGGAGCCGTAAATTTTATCACTACTTTAATTAATATACGATCAACAGGAATTACATTTGACCGAATACCATTATTTGTTTGATCAGTAGTAAATACAGCTTTATTACTTTTATTATCTTTA	Root	Metazoa	Arthropoda	Insecta	Diptera	Anthomyiidae	Anthomyiidae sp.	Anthomyiidae sp.	91	0	0	0	0	0	0	0	0	0	0	0	0	0	0	0	0	0	0	0	0	0	0	0	0	0	0	0	0	0	0	0	0	0	0	0	0	0	0	0
ASV077	ACTATCATCTAATATTGCACATGGAGGAGCTTCTGTTGATTTAGCTATTTTTTCTCTTCATTTAGCAGGAATTTCATCTATTTTAGGAGCTGTTAATTTTATTACAACTGTTATTAATATACGATCAACAGGAATTACTTTTGATCGAATACCATTATTTGTCTGATCAGTAGTAATTACAGCTCTATTACTTTTATTATCCCTA	Root	Metazoa	Arthropoda	Insecta	Diptera	Anthomyiidae	Botanophila	Botanophila sp.	3494	0	0	0	0	0	0	0	0	0	0	0	0	0	0	0	0	0	0	0	0	0	0	0	0	0	0	0	0	0	0	0	0	0	0	0	0	0	0	0
ASV078	ACTATCTTCTAACATTGCTCATGGTGGAGCTTCTGTTGATTTAGCAATTTTTTCCTTACATTTAGCAGGAATTTCATCAATTTTAGGAGCCGTAAATTTTATTACTACTGTAATTAATATACGATCTACAGGAATTACCTTTGATCGAATACCTTTATTTGTTTGATCAGTGGTAATTACAGCATTACTTCTTTTATTATCTTTA	Root	Metazoa	Arthropoda	Insecta	Diptera	Anthomyiidae	Delia	Delia sp.	359	0	0	0	0	0	0	0	0	0	0	0	0	0	0	0	0	0	0	0	0	0	0	0	0	0	0	0	0	0	0	0	0	0	0	0	0	0	0	0
ASV079	ACTATCATCTAATATTGCACATGGAGGAGCTTCTGTTGATTTAGCTATTTTTTCTCTTCATTTAGCAGGAATTTCGTCTATTTTAGGAGCTGTTAATTTTATTACAACTGTTATTAATATACGATCAACAGGAATTACTTTTGATCGAATACCGTTATTTGTTTGATCAGTAGTAATTACAGCTTTATTACTTTTACTATCCCTA	Root	Metazoa	Arthropoda	Insecta	Diptera	Calliphoridae	Lucilia	Lucilia sp. 1	1025751	0	0	0	0	0	6	4	0	0	0	0	0	0	0	0	0	0	0	0	0	0	0	61360	135934	0	0	0	0	34	64	2	1	0	0	0	1	4	0	0
ASV080	ACTATCATCTAATATTGCACATGGAGGAGCTTCTGTTGATTTAGCTATTTTTTCTCTTCATTTAGCAGGAATCTCATCTATTTTAGGAGCTGTTAATTTTATTACAACCGTTATTAATATACGATCAACAGGAATTTCTTTTGACCGAATACCATTATTTGTTTGATCAGTAGTAATTACAGCTCTATTACTTTTATTATCTCTA	Root	Metazoa	Arthropoda	Insecta	Diptera	Calliphoridae	Lucilia	Lucilia sp. 2	5102	0	0	0	0	0	0	2	0	0	0	0	0	0	0	0	0	0	0	0	0	0	0	832	1905	0	0	0	0	0	0	0	0	0	0	0	0	0	0	0
ASV081	ACTATCATCTAATATTGCACATGGAGGAGCTTCTGTTGATTTAGCTATTTTTTCTCTTCATTTAGCAGGAATTTCATCTATTTTAGGAGCTGTTAATTTTATTACAACTGTTATTAATATACGATCAACAGGAATTACTTTTGATCGAATACCATTATTTGTTTGATCAGTAGTAATTACAGCTCTATTACTTTTATTATCCCGA	Root	Metazoa	Arthropoda	Insecta	Diptera	Calliphoridae	Lucilia	Lucilia sp. 3	3442	0	0	0	0	0	0	0	0	0	0	0	0	0	0	0	0	0	0	0	0	0	0	454	1054	0	0	0	0	0	0	0	0	0	0	0	0	0	0	0
ASV082	ACTATCATCTAATATTGCACATGGAGGAGCTTCTGTTGATTTAGCTATTTTTTCCCTTCATTTAGCAGGAATTTCATCTATTTTAGGAGCTGTTTTTTTTATTACAACTGTTATTAATATTCGATCAACAGGTATTACTTTTGATCGAATACCATTATTTTTTTGATCAGTAGTAATTACAGCTCTATTACTTTTATTATCTTTA	Root	Metazoa	Arthropoda	Insecta	Diptera	Calliphoridae	Lucilia	Lucilia sp. 3	44	0	0	0	0	0	0	0	0	0	0	0	0	0	0	0	0	0	0	0	0	0	0	0	0	0	0	0	0	0	0	0	0	0	0	0	0	0	0	0
ASV083	ACTATCATCTAATATTGCACATGGAGGAGCTTCTGTTGATTTAACTATTTTTTCCCTTCATTTAGCAGGAATTTCATCTATTTTAGGAGCTGTTAATTTTATTACAACTGTTATTAATATACGATCAACAGGAATTACTTTTGACCGAATACCATTATTTGTTTGATCAGTAGTAATTACAGCTCTATTACTTTTATTATCCTTA	Root	Metazoa	Arthropoda	Insecta	Diptera	Calliphoridae	Lucilia	Lucilia sp. 4	2806	0	0	0	0	0	0	0	0	0	0	0	0	0	0	0	0	0	0	0	0	0	0	0	0	0	0	0	0	0	0	0	0	0	0	0	0	0	0	0
ASV084	ACTATCATCTAATATTGCACATGGAGGAGCTTCTGTTGATTTAGCTATTTTTTCCCTTCATTTAGCAGGAATTTCATCTATTTTAGGAGCTTTTAATTTTATTACAACTGTTATTAATATACGATCAACAGGAATTACTTTTGACCGAATACCATTATTTGTTTGATCAGTAGTAATTACAGCTCTATTACTTTTACTATCATTA	Root	Metazoa	Arthropoda	Insecta	Diptera	Calliphoridae	Lucilia	Lucilia sp. 5	192	0	0	0	0	0	0	0	0	0	0	0	0	0	0	0	0	0	0	0	0	0	0	0	0	0	0	0	0	0	0	0	0	0	0	0	0	0	0	0
ASV085	TTTATCTTCTAATATTGCCCACGGAGGAGCTTCTGTTGACTTAGCTATTTTTTCCCTCCATTTAGCCGGGGTTTCTTCAATTTTAGGAGCTGTAAACTTTATTACTACTGTAATTAATATACGATCCACAGGAATTACGTTTGACCGAATACCATTATTTGTATGATCAGTAGTAATTACGGCTTTATTACTTTTATTATCTTTA	Root	Metazoa	Arthropoda	Insecta	Diptera	Calliphoridae	Onesia	Onesia dispar	10	0	0	0	0	0	0	0	0	0	0	0	0	0	0	0	0	0	0	0	0	0	0	0	0	0	0	0	0	0	0	0	0	0	0	0	0	0	0	0
ASV086	TCTTTCATCAGGAATCGCTCATAGTGGAGCTTCTGTAGATTTAGCTATTTTTTCATTACATTTAGCAGGAATCTCTTCAATTTTAGGAGCAGTAAATTTTATTACAACAGTTATTAATATACGATCAACCGGAATTACATTTGATCGAATACCTTTATTTGTTTGATCAGTAGTAATCACTGCACTATTATTACTATTATCTTTA	Root	Metazoa	Arthropoda	Insecta	Diptera	Canacidae	Tethina	Tethina sp.	55075	0	0	0	0	0	0	0	0	0	1	11	2	0	0	0	0	0	0	0	0	15782	14920	0	0	0	0	0	0	3	9	0	0	0	0	0	0	1	0	0
ASV087	TCTTTCTTCATCTATTGCACACACAGGATCTTCTGTAGATTTTTCTATTTTTTCTTTACATATTGCAGGAATTTCCTCAATTTTAGGAGCAATTAATTTTATTTCAACTATATTAAATATAAAAATTAAATTTTTAAAATTAGATCAAATTTCTTTATTTACTTGATCAGTATTAATTACAGCTGTTTTATTACTTTTATCTTTA	Root	Metazoa	Arthropoda	Insecta	Diptera	Cecidomyiidae	Asteromyia	Asteromyia sp.	334	0	0	0	0	0	0	0	0	0	0	0	0	0	0	0	0	0	0	0	0	0	0	0	0	0	0	0	0	0	0	0	0	0	0	0	0	0	0	0
ASV088	TCTTTCTTCAATTATTGCACATACTAGTTCTTCTGTTGATTTATCTATTTTTTCTCTTCACATAGCCGGGATTTCTTCAATTTTGGGGGCAATTAATTTTATTACAACAATAATTAATATACGAATTAAAAATATTAAATTTGATCAAATTTCTTTATTTTCTTGATCAGTGATTATTACTGCTATTTTATTACTTCTATCATTA	Root	Metazoa	Arthropoda	Insecta	Diptera	Cecidomyiidae	Cecidomyiidae sp.	Cecidomyiidae sp. 1	3488	0	0	0	0	0	0	0	574	537	88	0	0	0	0	407	386	0	0	292	303	0	1	0	0	168	153	0	532	1	0	0	0	0	0	0	0	0	0	0
ASV089	TTTATCATCAATTATTGCTCACACAGGGTCAGCTGTAGATTTTTCAATTTTTTCTCTTCATATTGCTGGTATTTCTTCAATTTTAGGAGCAATTAATTTTATTTCAACAATAATTAATATAAAAATTAAATTTTTAAAATTTAATCAAATTTCTTTATTTGTATGATCTATTTTAATTACTACAATTCTTCTTCTTCTTTCTTTA	Root	Metazoa	Arthropoda	Insecta	Diptera	Cecidomyiidae	Cecidomyiidae sp.	Cecidomyiidae sp. 10	316	0	0	0	0	0	0	0	0	0	0	0	0	0	0	0	0	0	0	0	0	0	0	0	0	0	0	0	0	133	175	0	0	0	0	0	0	0	0	0
ASV090	TTTATCTTCAATTATCGCTCATACTGGATCTTCTGTTGATTTTTCAATTTTTTCTTTACATATAGCAGGTATTTCATCAATTTTAGGAGCAATCAATTTTATTTCTACAATATTAAATATAAAAATTAAATTTTTAAAATTTGATCAAATTTCATTATTTGTATGATCAATTTTAATTACAACTATTTTATTATTATTATCTTTA	Root	Metazoa	Arthropoda	Insecta	Diptera	Cecidomyiidae	Cecidomyiidae sp.	Cecidomyiidae sp. 11	630	0	0	0	0	0	0	0	0	0	0	0	0	0	0	0	0	0	0	0	0	0	0	0	0	0	0	0	0	0	0	0	0	0	0	0	0	0	0	0
ASV091	TCTTTCTTCTTCAATTGCCCATACTGGATCTTCAGTTGATTTTTCAATTTTTTCTCTTCATATTGCTGGAATTTCTTCAATTTTAGGAGCAATTAATTTTATTTCAACTATATTAAATATAAAAATTAAATATATTAAATTTGATCAAATTTCATTATTTACATGATCAGTATTAATTACTGCAGTTTTACTATTACTTTCTTTA	Root	Metazoa	Arthropoda	Insecta	Diptera	Cecidomyiidae	Cecidomyiidae sp.	Cecidomyiidae sp. 12	171	0	0	0	0	0	0	0	0	0	0	0	0	0	0	0	0	0	0	0	0	0	0	0	0	0	0	0	0	0	0	0	0	0	0	0	0	0	0	0
ASV092	TCTTTCTTCATCAATTGCCCATACAGGTTCATCAGTAGATTTTTCAATTTTTTCACTTCATATTGCAGGAATTTCTTCAATTCTAGGAGCAATTAATTTTATTTCTACAATATTAAATATAAAAATTAAATACATTAAATTTGATCAAATTTCATTATTTACTTGATCAGTTTTAATTACTGCTGTATTATTATTATTATCATTA	Root	Metazoa	Arthropoda	Insecta	Diptera	Cecidomyiidae	Cecidomyiidae sp.	Cecidomyiidae sp. 13	828	0	0	0	0	0	0	0	0	0	0	0	0	0	0	0	0	0	0	0	0	0	0	0	0	0	0	0	0	0	0	0	0	0	0	0	0	0	0	0
ASV093	CCTATCTTCAGTAATTGCACATACAGGATCAGCAGTAGACTTTTCAATTTTTTCTCTTCATATTGCCGGTATTTCTTCTATTCTAGGAGCTATTAATTTTATTTCTACAATAATTAATATAAAAATCAAATTTTTAAAATTTAATCAAATTTCACTATTTGTTTGATCTATTTTAATTACTACTATTCTTCTTCTTCTATCTTTA	Root	Metazoa	Arthropoda	Insecta	Diptera	Cecidomyiidae	Cecidomyiidae sp.	Cecidomyiidae sp. 14	751	0	0	0	0	0	0	0	0	0	0	0	0	0	0	0	0	0	0	0	0	0	0	0	0	0	0	0	0	0	0	0	0	0	0	0	0	0	0	0
ASV094	CTTATCATCATGTATTGCCCATACTGGATCTTCAGTAGATTTTTCTATTTTTTCTCTTCATATTGCTGGAATCTCTTCTATTTTAGGAGCTATTAACTTTATTTCTACAATATTAAATATAAAAATTAAATTTATTAAATTTGATCAAATCTCATTATTTACATGATCTGTATTAATTACTGCTGTTTTACTCCTTTTATCACTA	Root	Metazoa	Arthropoda	Insecta	Diptera	Cecidomyiidae	Cecidomyiidae sp.	Cecidomyiidae sp. 15	543	0	0	0	0	0	0	0	0	0	0	0	0	0	0	0	0	0	0	0	0	0	0	0	0	256	287	0	0	0	0	0	0	0	0	0	0	0	0	0
ASV095	CCTTTCATCAATTATTGCTCATACTGGTTCATCAGTAGATTTTTCAATTTTTTCATTACATATTGCTGGAATTTCATCAATTTTAGGAGCAATTAATTTTATTTCTACAATATTAAATATAAAAATTAAATTTTTAAAATTTGACCAAGTTTCTTTATTTGTTTGATCTATTTTAATTACTACTATTTTACTACTATTATCTTTA	Root	Metazoa	Arthropoda	Insecta	Diptera	Cecidomyiidae	Cecidomyiidae sp.	Cecidomyiidae sp. 16	150	0	0	0	0	0	0	0	0	0	0	0	0	0	0	0	0	0	0	0	0	0	0	0	0	0	0	0	0	0	0	0	0	0	0	0	0	0	0	0
ASV096	TTTATCTTCAGTTATTGCTCATACAGGTTCTTCAGTTGATTTTTCAATTTTTTCTCTTCATATTGCAGGTATTTCATCAATTTTAGGAGCAATTAATTTTATTTCAACAATAATTAATATAAAAATTAAATTCTTAAAATTTAATCAAATTTCTTTATTTACTTGATCTATTTTAATTACTACAATTTTACTTCTTCTTTCTTTA	Root	Metazoa	Arthropoda	Insecta	Diptera	Cecidomyiidae	Cecidomyiidae sp.	Cecidomyiidae sp. 17	143	0	0	0	0	0	0	0	0	0	0	0	0	0	0	0	0	0	0	0	0	0	0	0	0	0	0	0	0	0	0	0	0	0	0	0	0	0	0	0
ASV097	CCTATCATCCATTATTGCTCATACAGGATCAGCTGTAGATTTTTCAATTTTTTCTCTTCATATTGCCGGTATTTCTTCAATTCTAGGATCAATTAATTTTATTTCAACAATAATAAACATAAAAATTAAATTTTTAAAATTTAATCAAATTTCTTTATTTGTATGATCTATTTTAATTACTACAATTCTTCTTCTTCTTTCTTTA	Root	Metazoa	Arthropoda	Insecta	Diptera	Cecidomyiidae	Cecidomyiidae sp.	Cecidomyiidae sp. 18	139	0	0	0	0	0	0	0	0	0	0	0	0	0	0	0	0	0	0	0	0	0	0	0	0	0	0	0	0	0	0	0	0	0	0	0	0	0	0	0
ASV098	TTTATCATCAGTTATTGCACATACAGGATCATCAGTAGATTTTTCAATTTTTTCTCTTCATATTGCTGGAATCTCTTCAATTTTAGGAGCTATTAATTTTATTTCTACAATAATAAATATAAAAATTAAATTCTTAAAATTTAATCAAATTTCTTTATTTGTATGATCTATTTTAATTACTACTATTTTACTTTTACTCTCTTTA	Root	Metazoa	Arthropoda	Insecta	Diptera	Cecidomyiidae	Cecidomyiidae sp.	Cecidomyiidae sp. 19	104	0	0	0	0	0	0	0	0	0	0	0	0	0	0	0	0	0	0	0	0	0	0	0	0	46	58	0	0	0	0	0	0	0	0	0	0	0	0	0
ASV099	ACTATCATCAATTATCGCTCATACAGGAACTTCTGTAGATTTATCAATTTTTTCTCTTCATATAGCAGGTATTTCTTCAATTTTAGGCGCAATTAATTTCATTACAACAATAATTAACATACGAATTAAAAACATTAAATTAGAACAAATCCCCCTATTTGTCTGATCAGTTATTATTACTGCAGTATTACTTTTATTATCTCTC	Root	Metazoa	Arthropoda	Insecta	Diptera	Cecidomyiidae	Cecidomyiidae sp.	Cecidomyiidae sp. 2	297	0	0	0	0	0	0	0	0	0	0	0	0	109	187	0	0	0	0	0	0	0	0	0	1	0	0	0	0	0	0	0	0	0	0	0	0	0	0	0
ASV100	TCTTTCTTCATCAATTGCTCATACAGGATCATCAGTAGATTTCTCTATTTTTTCTCTTCATATTGCTGGAATTTCATCTATTTTAGGAGCAATTAATTTTATTTCTACTATATTAAATATAAAAATTAAATATATTAAATTTGATCAAATTTCATTATTTACTTGATCAGTATTAATTACTGCTGTATTATTATTACTTTCATTA	Root	Metazoa	Arthropoda	Insecta	Diptera	Cecidomyiidae	Cecidomyiidae sp.	Cecidomyiidae sp. 20	58	0	0	0	0	0	0	0	0	0	0	0	0	0	0	0	0	0	0	0	0	0	0	0	0	0	0	0	0	0	0	0	0	0	0	0	0	0	0	0
ASV101	CCTTTCTTCATCAATTGCTCATACAGGTTCATCAGTTGATTTTTCTATTTTTTCTCTACATATTGCAGGAATTTCATCAATTTTAGGAGCAATTAATTTTATTTCTACAATATTAAATATAAAAATTAAATATATTAAATTTGATCAAATTTCTTTATTCACTTGATCAGTATTAATTACTGCTGTATTATTATTATTATCATTA	Root	Metazoa	Arthropoda	Insecta	Diptera	Cecidomyiidae	Cecidomyiidae sp.	Cecidomyiidae sp. 22	22	0	0	0	0	0	0	0	0	0	0	0	0	0	0	0	0	0	0	0	0	0	0	0	0	0	0	0	0	0	0	0	0	0	0	0	0	0	0	0
ASV102	CTTATCTTCATCAATTGCACATACTGGATCTTCAGTAGATTTTTCTATTTTTTCTCTTCATATTGCTGGAATTTCTTCAATTTTAGGAGCTATTAATTTTATTTCTACAATATTAAATATAAAAATTAAATTTATTAAATTTGATCAAATTTCTTTATTTACTTGATCAGTATTAATTACAGCTGTATTATTATTATTATCATTA	Root	Metazoa	Arthropoda	Insecta	Diptera	Cecidomyiidae	Cecidomyiidae sp.	Cecidomyiidae sp. 23	21	0	0	0	0	0	0	0	0	0	0	0	0	0	0	0	0	0	0	0	0	0	0	0	0	0	0	0	0	0	0	0	0	0	0	0	0	0	0	0
ASV103	TCTTTCTTCTTCAATTGCCCATACTGGATCATCAGTAGATTTTTCAATTTTTTCATTACATATTGCAGGAATTTCATCAATTTTAGGAGCTATTAATTTTATTTCAACAATATTAAATATAAAAATTAAATATATTAAATTTGATCAAATTTCTTTATTTACCTGATCAGTATTAATTACTGCCGTATTATTACTTTTATCATTA	Root	Metazoa	Arthropoda	Insecta	Diptera	Cecidomyiidae	Cecidomyiidae sp.	Cecidomyiidae sp. 24	22	0	0	0	0	0	0	0	0	0	0	0	0	0	0	0	0	0	0	0	0	0	0	0	0	0	0	0	0	0	0	0	0	0	0	0	0	0	0	0
ASV104	ACTATCATCAACAATTGCACATACAGGATCTTCTGTAGATTTTTCAATTTTTTCATTACATATTGCAGGAATTTCATCAATTTTAGGAGCAATTAATTTTATTTCAACAATATTTAATATAAAAATTAAATTTTTAAAATTTGATCAAATTTCATTATTTACTTGATCAGTATTAATTACTGCATTTTTATTATTATTATCATTA	Root	Metazoa	Arthropoda	Insecta	Diptera	Cecidomyiidae	Cecidomyiidae sp.	Cecidomyiidae sp. 25	19	0	0	0	0	0	0	0	0	0	0	0	0	0	0	0	0	0	0	0	0	0	0	0	0	0	0	0	0	0	0	0	0	0	0	0	0	0	0	0
ASV105	TCTTTCTTCATCAATTGCTCATACAGGATCATCCGTTGATTTTTCTATTTTTTCTTTACATATTGCAGGGATTTCATCAATTTTAGGGGCAATTAATTTTATTTCTACAATATTAAATATAAAAATTAAATATATTAAATTTGATCAAATTTCTTTATTTACCTGATCAGTATTAATTACTGCTGTTTTATTATTATTATCATTA	Root	Metazoa	Arthropoda	Insecta	Diptera	Cecidomyiidae	Cecidomyiidae sp.	Cecidomyiidae sp. 27	78	0	0	0	0	0	0	0	0	0	0	0	0	0	0	0	0	0	0	0	0	0	0	0	0	0	0	0	0	0	0	0	0	0	0	0	0	0	0	0
ASV106	TCTATCATCTATTATCGCTCACACCGGATCTTCCGTTGACTTTTCTATTTTTTCTTTACATATCGCAGGTATTTCATCAATTTTAGGAGCTATTAATTTTATTTCAACAATATTAAATATAAAAATTAAATTTTTAAAATTTGATCAAATTTCATTATTTATCTGATCAATTTTAATTACTACTATTATATTACTTTTATCATTA	Root	Metazoa	Arthropoda	Insecta	Diptera	Cecidomyiidae	Cecidomyiidae sp.	Cecidomyiidae sp. 28	74	0	0	0	0	0	32	42	0	0	0	0	0	0	0	0	0	0	0	0	0	0	0	0	0	0	0	0	0	0	0	0	0	0	0	0	0	0	0	0
ASV107	TCTTTCATCAATAATTGCTCACACAGGATCATCAGTAGATTTTTCAATTTTTTCTCTTCATATTGCAGGAATTTCATCAATTTTAGGTGCTATTAATTTTATTTCAACAATAATAAATATAAAAATTAAATTTTTAAAATTTAATCAAATTTCTCTATTTACATGATCAATTTTAATTACAACAATTCTTTTATTACTTTCTCTT	Root	Metazoa	Arthropoda	Insecta	Diptera	Cecidomyiidae	Cecidomyiidae sp.	Cecidomyiidae sp. 29	64	0	0	0	0	0	0	0	0	0	0	0	0	0	0	0	0	0	0	0	0	0	0	0	0	0	0	0	0	0	0	0	0	0	0	0	0	0	0	0
ASV108	ACTTTCTTCAGTAATTGCTCATACTGGATCTGCTGTAGATTTTTCAATTTTTTCTTTACACATTGCTGGAATTTCATCAATTTTAGGCGCAATTAATTTTATTTCAACAATAATTAATATAAAAATTAAATTTTTAAAATTTAATCAAATTTCTTTATTTGTTTGATCTATTATAATTACTACAATTTTACTATTATTATCATTA	Root	Metazoa	Arthropoda	Insecta	Diptera	Cecidomyiidae	Cecidomyiidae sp.	Cecidomyiidae sp. 3	166	0	0	0	0	0	0	0	0	0	0	0	0	0	0	0	0	0	0	0	0	0	0	0	0	0	0	0	0	0	0	0	0	0	0	0	0	0	0	0
ASV109	TCTATCATCTATTATTGCTCATACAGGGTCTTCAGTAGATTTTTCTATTTTTTCATTACATATTGCAGGTATTTCATCAATCTTAGGAGCTATTAATTTTATTTCGACTATGTTAAATATAAAAATTAAATTTTTAAAATTTGATCAAATTTCTTTATTTATTTGATCAATTTTAATCACTACAATTTTATTACTTTTATCTTTA	Root	Metazoa	Arthropoda	Insecta	Diptera	Cecidomyiidae	Cecidomyiidae sp.	Cecidomyiidae sp. 30	47	0	0	0	0	0	0	0	0	0	0	0	0	0	0	0	0	0	0	0	0	0	0	0	0	0	0	0	0	0	0	0	0	0	0	0	0	0	0	0
ASV110	CTTATCATCTATCATTGCCCATACAAGATCAGCTGTAGATTTTTCAATTTTTTCTCTTCATATTGCTGGTATTTCTTCAATTTTAGGAGCAATTAACTTCATTTCAACAATAATTAACATAAAAATTAAATTTTTAAAATTTAATCAAATTTCTCTATTTGTTTGATCTATTTTAATTACTACAATCCTTCTTCTTCTTTCTTTA	Root	Metazoa	Arthropoda	Insecta	Diptera	Cecidomyiidae	Cecidomyiidae sp.	Cecidomyiidae sp. 31	52	0	0	0	0	0	0	0	0	0	0	0	0	0	0	0	0	0	0	0	0	0	0	0	0	0	0	0	0	0	0	0	0	0	0	0	0	0	0	0
ASV111	TCTTTCATCAATTATTGCACATACAGGATCTTCTGTAGATTTTTCAATTTTTTCACTTCATATTGCAGGTATTTCATCTATTTTAGGAGCAATTAACTTTATTTCTACAATATTAAATATAAAAATCAAATTTTTAAAATTTGATCAAGTTTCTTTATTTGTATGATCTATTTTAATTACTACTATTCTTTTATTATTATCATTA	Root	Metazoa	Arthropoda	Insecta	Diptera	Cecidomyiidae	Cecidomyiidae sp.	Cecidomyiidae sp. 4	73312	0	0	0	0	0	0	0	0	0	0	3	0	15	31	0	0	0	0	0	0	26	32	1	0	0	0	0	0	0	0	1	0	0	0	0	0	0	24	0
ASV112	CTTATCTTCAGTAATTGCTCACACAGGATCTTCAGTTGATTTTTCAATTTTTTCTCTTCATATTGCGGGTATTTCATCAATTTTAGGAGCAATTAATTTTATTTCAACAATAATAAATATAAAAATTAAATTCCTAAAATTTAATCAAATTTCTTTATTTACATGATCAATTTTAATTACAACAATTCTTTTACTTCTTTCTTTA	Root	Metazoa	Arthropoda	Insecta	Diptera	Cecidomyiidae	Cecidomyiidae sp.	Cecidomyiidae sp. 5	2771	0	0	0	0	0	0	0	0	0	0	0	0	0	0	0	0	0	0	0	0	0	0	0	0	0	0	0	0	0	0	0	0	0	0	0	0	0	0	0
ASV113	TCTATCTTCAATTATTGCTCACACAGGATCAGCTGTTGATTTTTCAATTTTTTCTATTCATATTGCAGGAATTTCTTCAATTTTAGGAGCTATTAATTTTATTTCAACAATAATTAATATAAAAATTAAATTTTTAAAATTTAATCAAATTTCATTATTTGTTTGATCAATTTTAATTACTACTATTCTTCTTCTTTTATCTTTA	Root	Metazoa	Arthropoda	Insecta	Diptera	Cecidomyiidae	Cecidomyiidae sp.	Cecidomyiidae sp. 6	825	0	0	0	0	0	0	0	0	0	33	0	0	0	0	277	274	23	54	0	0	0	0	0	0	0	0	0	0	0	0	0	0	0	0	0	0	0	0	0
ASV114	TCTATCTTCTTCTATTGCTCATACAGGATCATCAGTAGATTTTTCAATTTTTTCATTACATATTGCAGGGATTTCATCAATTTTAGGAGCTATTAATTTTATTTCTACTATACTTAATATAAAAATTAAATATATTAAATTTGATCAAATTTCATTATTTACTTGATCAGTTTTAATTACTGCAGTTCTTTTACTTTTATCATTA	Root	Metazoa	Arthropoda	Insecta	Diptera	Cecidomyiidae	Cecidomyiidae sp.	Cecidomyiidae sp. 7	728	0	0	0	0	0	0	0	264	347	0	0	0	0	0	0	12	0	0	0	0	0	0	0	1	0	0	0	3	0	0	0	0	0	0	0	0	0	0	0
ASV115	TCTTTCTTCTTCAATTGCTCATACAGGATCATCAGTAGATTTTTCAATTTTTTCATTACATATTGCAGGAATTTCATCAATTTTAGGAGCTATTAATTTTATTTCAACAATATTAAATATAAAAATTAAATATATTAAATTTGATCAAATTTCATTATTTACTTGATCAGTTTTAATTACTGCAGTACTTTTACTTTTATCATTA	Root	Metazoa	Arthropoda	Insecta	Diptera	Cecidomyiidae	Cecidomyiidae sp.	Cecidomyiidae sp. 8	508	0	0	0	0	0	0	0	0	0	0	0	0	0	0	0	0	0	0	0	0	0	0	0	0	0	0	0	0	0	0	0	0	0	0	0	0	0	0	0
ASV116	TCTTTCATCAATTATTGCTCATACAGGATCATCAGTTGATTTTTCTATTTTTTCATTACATATAGCTGGAATTTCATCAATTTTAGGAGCTATTAATTTTATTTCTACAATATTAAATATAAAAATTAAATTCTTAAAATTTGACCAAATTTCCTTATTTGTTTGATCAATTTTAATTACTACTATTTTATTACTTCTTTCATTA	Root	Metazoa	Arthropoda	Insecta	Diptera	Cecidomyiidae	Cecidomyiidae sp.	Cecidomyiidae sp. 9	616	0	0	0	0	0	0	0	0	0	0	0	0	0	0	0	0	0	0	0	0	0	0	0	0	0	0	0	0	0	0	0	0	0	0	0	0	0	0	0
ASV117	ACTTTCATCAATTATTGCTCATACTGGATCTTCTGTAGATTTTTCTATTTTTTCATTACATATTGCAGGAATTTCATCAATTTTAGGAGCAATTAATTTTATCTCTACTATATTAAATATAAAAATTAAATTTTTAAAATTTGATCAAATTTCTTTATTTATTTGATCAATTTTAATTACTACTGTATTATTGTTATTATCTTTG	Root	Metazoa	Arthropoda	Insecta	Diptera	Cecidomyiidae	Cecidomyiidae sp.	Cecidomyiidae sp. MG128519.1	1728	0	0	0	0	0	0	0	0	0	0	0	0	0	0	0	0	0	0	0	0	0	0	0	0	0	0	0	0	0	0	0	0	0	0	0	0	0	0	0
ASV118	TCTTTCATCAATTATTGCTCATACTGGATCAGCAGTAGATTTTTCAATTTTTTCTCTTCATATTGCAGGAATTTCATCAATTTTAGGAGCAATTAATTTTATTTCTACAATAATTAATATAAAAATTAAATTTTTAAAATTTAATCAAATTTCATTATTTGTTTGATCTATTTTAATTACTACAATTCTTTTATTACTTTCATTG	Root	Metazoa	Arthropoda	Insecta	Diptera	Cecidomyiidae	Cecidomyiidae sp.	Cecidomyiidae sp. nr JF872500.1	3093	0	0	0	0	0	0	0	13	16	0	725	344	0	0	0	0	0	0	0	0	0	0	0	0	0	0	0	0	0	0	0	0	0	0	0	0	0	0	0
ASV119	TCTATCATCAACAATTGCACATACAGGGTCATCAGTTGATTTTTCAATTTTTTCATTACATATTGCAGGTATTTCATCAATTTTAGGAGCTATTAATTTTATTTCAACAATATTTAATATAAAAATTAAATTTTTAAAATTTGATCAAATTTCTTTATTTACTTGATCAGTATTAATTACTGCATTTTTATTATTATTATCATTA	Root	Metazoa	Arthropoda	Insecta	Diptera	Cecidomyiidae	Suaediola	Suaediola sp.	47	0	0	0	0	0	0	0	0	0	0	0	0	0	0	0	0	0	0	0	0	0	0	0	0	0	0	0	0	0	0	0	0	0	0	0	0	0	0	0
ASV120	TTTATCAGCAAACGTATCCCACGCTGGGGCTTCAGTTGATTTAGCTATTTTTTCTTTGCATTTGGCCGGTATCTCTTCAATTTTAGGAGCAGTAAATTTTATTACTACTATTATTAATATACGATCTAATGGAATTACTTTCGACCGAATACCTTTATTTGTATGATCAGTATTAATTACTGCCATTTTATTACTTTTATCTTTA	Root	Metazoa	Arthropoda	Insecta	Diptera	Ceratopogonidae	Ceratopogonidae sp.	Ceratopogonidae sp. 1	9219	0	0	0	0	0	0	0	0	0	0	0	0	0	0	0	0	0	0	0	0	2624	2661	0	0	0	0	0	0	0	0	0	0	0	0	0	0	0	0	0
ASV121	ACTTGCTGCTAATGTTTCTCATGCAGGAGCTTCTGTAGATTTAGCAATTTTTTCTTTACATTTAGCTGGTATTTCATCAATTCTTGGAGCTGTAAATTTTATTACAACAATTATTAATATACGATCTACAGGAATTACTTTTGATCGAATACCTTTATTTGTTTGATCTGTATTTATTACAGCAATTTTACTTTTACTTTCCCTT	Root	Metazoa	Arthropoda	Insecta	Diptera	Ceratopogonidae	Ceratopogonidae sp.	Ceratopogonidae sp. 2	9398	0	0	1	0	0	0	3	4817	4576	0	0	0	0	0	0	0	0	0	0	0	0	0	1	0	0	0	0	0	0	0	0	0	0	0	0	0	0	0	0
ASV122	ATTAGCTAGTAATATCGCTCATAGAGGAGCCTCTGTTGATTTAGCAATTTTCTCCCTTCATCTAGCTGGAATCTCTTCTATTTTAGGAGCAGTAAATTTTATTACAACAATTATTAATATACGATCAAAAGGAATTACATTCGACCGTATACCGTTATTTGTATGATCAGTATTAATTACTGCTATCTTATTACTTCTCTCACTA	Root	Metazoa	Arthropoda	Insecta	Diptera	Ceratopogonidae	Ceratopogonidae sp.	Ceratopogonidae sp. 3	678	0	0	0	0	0	0	0	0	0	0	0	0	0	0	0	0	0	0	0	0	0	0	0	0	0	0	50	497	0	0	0	0	0	0	0	0	0	0	0
ASV123	TTTATCAGCAAATATTGCACATGCTGGAGCATCTGTAGATTTGGCTATTTTTTCTCTTCATTTAGCCGGGATCTCATCAATCTTAGGGGCAGTTAATTTTATTACTACAATTATTAATATACGATCAAATGGTATTACCTTTGACCGAATACCTCTATTTGTTTGATCTGTTCTTATTACAGCTATTTTATTGCTTCTTTCACTA	Root	Metazoa	Arthropoda	Insecta	Diptera	Ceratopogonidae	Ceratopogonidae sp.	Ceratopogonidae sp. 4	172	0	0	0	0	0	0	0	0	0	0	0	0	0	0	0	0	0	0	0	0	0	0	0	0	0	0	0	0	0	0	0	0	0	0	0	0	0	0	0
ASV124	CCTTTCTTCAGCTATTGCCCACAGAGGAGCATCAGTTGATTTAGCTATTTTTTCTCTTCATTTAGCGGGAGTATCTTCAATTTTAGGTTCTGTAAATTTTATTACCACAGTAATTAATATACGAGCTAATGGAATTACTTTAGATCGAATACCTTTATTTGTATGATCTGTAGTAATTACAACAGTTTTACTTCTTTTATCTTTA	Root	Metazoa	Arthropoda	Insecta	Diptera	Chironomidae	Chironomidae sp.	Chironomidae sp. 1	111757	75	0	0	0	0	0	0	0	0	0	0	0	0	0	0	0	0	0	0	0	0	0	0	0	0	0	0	0	0	0	9	0	0	0	137	0	0	0	0
ASV125	ATTATCAGCAGCTATTGCTCATAGAGGGGCATCTGTTGATCTTGCTATTTTTTCACTTCATTTAGCGGGAGTATCATCTATTCTTGGATCAGTAAATTTTATTACTACAGTAATTAATATACGAGCAAATGGAATTACTCTTGATCGAATACCTTTATTTGTTTGATCTGTTGTAATTACAACAGTTCTTCTTCTTCTTTCTCTG	Root	Metazoa	Arthropoda	Insecta	Diptera	Chironomidae	Chironomidae sp.	Chironomidae sp. 2	69531	0	0	0	0	0	0	0	0	0	0	0	0	0	0	0	0	0	0	0	0	0	0	0	0	0	0	0	0	0	0	0	0	0	0	0	0	0	0	0
ASV126	TTTATCCTCAAGAATTGCTCATAGTGGGGCTTCTGTAGATTTAGCTATTTTTTCTTTACATCTTGCCGGAATTTCTTCTATTTTAGGGTCTGTAAATTTTATCACAACAGCTATTAATATGCGAGCTAATGGGATTACATTAGATCGAATACCTCTATTTGTATGATCAGTAATTATTACCACAATTCTCCTTTTATTGTCTCTC	Root	Metazoa	Arthropoda	Insecta	Diptera	Chironomidae	Chironomidae sp.	Chironomidae sp. 3	14687	0	0	0	0	0	0	0	0	0	0	0	0	0	0	0	0	0	0	0	0	0	0	0	0	0	0	0	0	0	0	0	0	0	0	0	0	0	0	0
ASV127	CCTATCTTCAAGAATTGCTCACAGAGGAGCTTCAGTTGATTTAGCAATTTTTTCTTTACATTTAGCAGGAATTTCATCAATTTTAGGTTCAGTAAATTTTATTACTACAGCAATTAATATGCGATCTAAGGGAATTACATTAGATCGAATACCTTTATTTGTATGATCTGTAATTATTACGACTATTCTTCTTCTTTTATCTCTT	Root	Metazoa	Arthropoda	Insecta	Diptera	Chironomidae	Chironomidae sp.	Chironomidae sp. 4	55	0	0	0	0	0	0	0	0	0	0	0	0	0	0	0	0	0	0	0	0	0	0	0	0	0	0	0	0	0	0	0	0	0	0	0	0	0	0	0
ASV128	TCTTTCAGCAAGAATCGCTCATGCAGGGGCTTCAGTTGACCTAACTATTTTTTCTTTACATTTAGCTGGAATTTCATCTATTTTAGGGGCAGTAAACTTTATCACTACAGTAATTAATATACGATCTAATGGGCTAACTTTAGAACGAATACCTTTATTTGTTTGATCAGTTTTTATTACAGCAATTTTATTATTACTATCACTT	Root	Metazoa	Arthropoda	Insecta	Diptera	Chironomidae	Chironomidae sp.	Chironomidae sp. KR757231.1	89480	0	0	7	0	0	3	2	0	0	0	5	1	429	920	0	0	0	0	0	0	7096	6870	1	0	0	0	342	4640	0	1	33173	25948	1411	0	0	0	0	0	1
ASV129	TTTATCATCAAGAATTGCCCACGCAGGATCTTCAGTTGATTTAGCAATTTTTTCTCTTCATTTAGCAGGAATTTCTTCAATTTTAGGAGCAGTAAATTTTATTACTACAGTAATTAATATACGATCAATAGGAATTACTTTAGATCGAATACCTTTATTTGTATGATCAGTTTTTATTACTGCTATTCTTTTACTTCTTTCTTTA	Root	Metazoa	Arthropoda	Insecta	Diptera	Chironomidae	Chironomidae sp.	Chironomidae sp. MG142680.1	308	0	0	0	0	0	0	0	0	0	0	0	0	0	0	0	0	0	0	0	0	0	0	0	0	0	0	0	0	0	0	0	0	0	0	0	0	0	0	0
ASV130	ACTTTCTGCGGCAATTGCTCATAGTGGGGCTTCTGTAGATTTAGCTATTTTTTCTTTACATTTAGCCGGAGTATCATCAATTTTAGGTTCAGTAAATTTTATTACTACAGTTATTAATATACGAGCTAATGGAATTACTCTCGATCGAATACCTCTTTTTGTTTGATCAGTAGTAATTACTACTGTTCTCCTATTGCTTTCTTTA	Root	Metazoa	Arthropoda	Insecta	Diptera	Chironomidae	Chironomus	Chironomus circumdatus	4	0	0	0	0	0	0	0	0	0	0	0	0	0	0	0	0	0	0	0	0	0	0	0	0	0	0	0	0	0	0	0	0	0	0	0	0	0	0	0
ASV131	TCTTTCTGCAGCTATTGCACATAGAGGGGCTTCAGTAGACTTAGCTATTTTTTCTTTACATTTAGCAGGTGTTTCTTCAATTCTAGGTTCTGTAAATTTTATTACAACAGTTATTAATATACGAGCAAATGGAATTACTTTAGATCGAATACCTTTATTTGTTTGATCTGTTGTTATTACAACAGTTCTTTTATTATTATCTCTC	Root	Metazoa	Arthropoda	Insecta	Diptera	Chironomidae	Chironomus	Chironomus cloacalis	118	55	0	0	0	0	0	0	0	0	0	29	18	0	0	0	0	0	0	0	2	6	8	0	0	0	0	0	0	0	0	0	0	0	0	0	0	0	0	0
ASV132	CTTATCTGCTGCTATTGCTCATAGTGGGGCCTCAGTCGACTTAGCAATTTTCTCATTACATTTAGCAGGTGTTTCTTCTATTCTCGGTTCAGTAAATTTTATTACTACAGTAATTAATATGCGGGCAAACGGAATTACTTTAGATCGAATACCCCTATTTGTTTGATCTGTGGTTATTACTACTGTTCTTCTCCTTCTGTCGCTT	Root	Metazoa	Arthropoda	Insecta	Diptera	Chironomidae	Chironomus	Chironomus duplex	550373	3089	176	229	20033	60604	54328	44332	4	14	2	136	101	40884	77310	0	0	0	0	2	3	32	53	71	143	48240	58742	2	3	6	8	30	19	5	2	0	2	2	47	0
ASV133	TCTTTCCGCAGCTATTGCTCATAGTGGGGCTTCAGTAGACTTAGCTATTTTTTCTCTTCATTTAGCAGGAGTATCTTCTATTCTTGGTTCAGTAAATTTTATTACTACAGTAATTAATATACGAGCTAATGGTATTACTCTTGATCGAATACCTTTATTTGTATGATCAGTTGTAATTACAACTGTTCTTCTTCTTTTATCTTTA	Root	Metazoa	Arthropoda	Insecta	Diptera	Chironomidae	Chironomus	Chironomus tepperi	1239929	1358	0	5	1	0	4525	3882	3	3	48026	381	198	0	0	0	0	36106	65808	24562	29310	58	53	4	16	47682	53417	4	12	153	153	67	62	15973	148385	124091	95163	82045	21880	69844
ASV134	TTTATCTTCTGCAATTGCCCACAGAGGGGCTTCTGTTGATTTAGCTATTTTCTCTTTACATTTAGCAGGGGTTTCTTCAATTTTAGGTTCTGTAAATTTTATTACAACAGTAATTAATATACGAGCTAATGGTATTACTTTAGACCGAATACCTTTATTTGTGTGATCAGTTGTAATTACAACTGTTTTATTACTTCTTTCACTT	Root	Metazoa	Arthropoda	Insecta	Diptera	Chironomidae	Cladopelma	Cladopelma sp. AY752683.1	10391	0	0	0	0	0	0	0	0	0	0	0	0	0	0	0	0	0	0	0	0	0	0	0	0	126	140	0	0	0	0	0	0	0	0	0	0	0	0	0
ASV135	TCTTTCTTCTAATATTGCTCACAGAGGGGCTTCTGTAGACCTAGCAATTTTTTCATTACATTTAGCAGGTATCTCTTCAATTTTAGGGTCAGTAAATTTTATTACAACAGCTATTAACATACGAAGAAATGGAATTACTTTAGACCGAATACCTTTATTTGTATGATCAGTAGTAATTACAACTATTCTTTTACTTTTATCTTTA	Root	Metazoa	Arthropoda	Insecta	Diptera	Chironomidae	Cladotanytarsus	Cladotanytarsus australomancus	3	0	0	0	0	0	0	0	0	0	0	0	0	0	0	0	0	0	0	0	0	0	0	0	0	0	0	0	0	0	0	0	0	0	0	0	0	0	0	0
ASV136	TCTTTCTTCTAATATTGCTCATAGAGGAGCTTCTGTTGATTTAGCAATTTTTTCTTTACATTTAGCTGGAATTTCATCAATTTTGGGTTCTGTAAATTTTATTACAACAGCTATTAATATACGAAGAAATGGAATTTCTTTAGATCGAATACCATTATTTGTCTGATCAGTTGTAATTACAACTATTTTACTTTTATTATCTTTA	Root	Metazoa	Arthropoda	Insecta	Diptera	Chironomidae	Cladotanytarsus	Cladotanytarsus sp. DQ393877.1	1796	0	0	0	0	0	0	0	0	0	0	0	0	0	0	0	0	0	0	0	0	0	0	0	0	0	0	0	0	0	0	0	0	0	0	0	0	0	0	0
ASV137	TTTATCCTCAACTATTGCTCATAGAGGGGCTTCTGTTGATTTAGCTATTTTCTCTTTACACTTAGCAGGAGTTTCTTCAATTTTAGGATCCGTAAATTTTATTACTACTGTAATTAATATACGAGCTAATGGGATTACTTTAGACCGAATACCATTATTTGTGTGATCAGTAGTAATTACTACTGTATTACTTTTATTATCACTT	Root	Metazoa	Arthropoda	Insecta	Diptera	Chironomidae	Cryptochironomus	Cryptochironomus sp. KJ946712.1	62075	0	0	0	0	0	0	0	0	0	0	0	0	0	0	0	0	0	0	0	0	0	0	0	0	0	0	0	0	0	0	0	0	0	0	0	0	0	0	0
ASV138	CCTATCCTCAGCAATTGCCCATAGAGGAGCATCTGTTGATTTAGCAATCTTTTCTCTTCATTTAGCGGGGGTATCTTCTATTTTAGGATCTGTAAATTTTATTACCACAGTAATTAATATGCGAGCAAATGGAATTACTTTAGACCGAATACCTTTATTTGTTTGATCTGTTGTAATTACAACAGTTCTACTTTTACTATCTTTA	Root	Metazoa	Arthropoda	Insecta	Diptera	Chironomidae	Dicrotendipes	Dicrotendipes sp. KC750420.1	3858	0	0	0	0	0	0	0	0	0	0	0	0	0	0	0	0	0	0	0	0	0	0	0	0	0	0	0	0	0	0	0	0	0	0	0	0	0	0	0
ASV139	GCTTTCTTCCGCTATTGCCCATAGAGGGGCCTCTGTTGACCTAGCTATTTTTTCTCTACACTTAGCAGGAGTATCATCAATTTTAGGTTCTGTAAATTTTATTACAACAGTAATTAATATACGTGCAAATGGTATTACATTAGACCGAATGCCACTATTTGTTTGATCTGTTGTAATTACAACAGTTTTATTACTATTATCTTTA	Root	Metazoa	Arthropoda	Insecta	Diptera	Chironomidae	Parachironomus	Parachironomus delinificus	1931	0	0	0	0	0	0	0	0	0	0	0	0	0	0	0	0	0	0	0	0	0	0	0	0	0	0	0	0	2	4	0	0	0	0	0	0	0	0	193
ASV140	TCTTTCTTCCAGAATTGCCCATGCCGGTGCTTCAGTAGATTTAGCAATCTTTTCTCTTCATTTAGCTGGTATTTCTTCTATTTTAGGAGCTGTAAATTTCATTACTACAATTATTAATATGCGTTCTGAAGGGATCTCTTTTGACCGAATACCTTTATTTGTGTGGTCAGTTTTAATTACTGCAATTCTTCTACTCTTATCATTA	Root	Metazoa	Arthropoda	Insecta	Diptera	Chironomidae	Paralimnophyes	Paralimnophyes sp. KC750464.1	2061	0	1	6	0	0	4	1	0	1	0	0	0	678	1369	0	0	0	0	0	0	0	0	0	1	0	0	0	0	0	0	0	0	0	0	0	0	0	0	0
ASV141	TCTATCATCTAGAATTGCTCATAGAGGGGCTTCTGTAGATCTTGCTATTTTTTCTTTACATCTGGCAGGAATTTCTTCAATTTTAGGGTCAGTAAATTTTATTACAACCGCAATTAATATACGCTCAAATGGTATTACCTTAGATCGTATACCATTATTTGTCTGATCTGTAATTATTACAACAATTTTACTTCTTTTATCCCTA	Root	Metazoa	Arthropoda	Insecta	Diptera	Chironomidae	Paratanytarsus	Paratanytarsus grimmii	322	0	0	0	0	0	0	0	0	0	0	0	0	0	0	0	0	0	0	0	0	0	0	0	0	0	0	0	0	0	0	0	0	0	0	0	0	0	0	0
ASV142	CCTTTCTTCAGGTATTGCTCATGCAGGAGCCTCAGTTGACTTAGCTATTTTTTCTTTACATTTAGCTGGAATTTCTTCTATCTTAGGAGCTGTAAATTTTATTACTACTGTTATTAATATACGTTCAGAAGGAATCACCTTAGACCGAATGCCTTTATTTGTTTGGTCTGTTGTAATTACTGCTGTTTTATTACTACTATCTTTG	Root	Metazoa	Arthropoda	Insecta	Diptera	Chironomidae	Paratrichocladius	Paratrichocladius australiensis	1141	0	0	0	0	0	0	0	0	0	0	0	0	0	0	0	0	0	0	93	121	0	0	0	0	0	0	0	0	0	0	0	0	0	0	0	0	0	0	0
ASV143	TTTATCAGCAAGAATTGCACATAGAGGAGCCTCAGTAGATCTTGCTATTTTCTCTCTTCATCTCGCAGGAGTTTCATCCATTCTAGGATCAGTAAATTTTATTACAACAGTAATTAATATGCGATCAAGAGGGATTACCCTAGACCGAATACCATTATTTGTCTGATCTATTGTTATTACTACAGTTCTACTTCTTCTTTCATTA	Root	Metazoa	Arthropoda	Insecta	Diptera	Chironomidae	Polypedilum	Polypedilum nubifer	501079	0	0	0	0	0	0	0	0	0	5	0	0	0	0	0	0	0	0	0	0	0	0	0	0	5345	5795	0	5	0	0	0	5	0	3	0	0	0	0	87281
ASV144	TTTAGCATCTGGGATTGCACATGCTGGAGCCTCAGTTGATTTAGCTATTTTTTCATTACACTTAGCAGGTGTCTCATCAATTTTAGGTGCAGTAAATTTTATTACAACAGTAATTAATATACGATCAAACGGGATTACATTAGATCGAATACCTTTATTTGTTTGATCAGTAATTATTACTGCTATTTTATTACTATTATCTTTA	Root	Metazoa	Arthropoda	Insecta	Diptera	Chironomidae	Procladius	Procladius paludicola	1010528	5	9	15	0	0	3	4	0	0	0	13	13	1122	2177	4515	4619	39244	71649	0	1	34515	37554	4	13	21868	23594	188	4316	47	96	291	205	22	10	9	4	5	149551	1562
ASV145	CTTAGCATCAGGAATTGCACATGCTGGAGCATCGGTTGATTTAGCTATTTTTTCACTACATCTAGCAGGTATTTCATCAATTTTAGGAGCAGTAAACTTTATTACAACAGTAATTAATATACGATCAAATGGAATTACATTAGATCGAATACCTTTATTTGTTTGATCAGTAATTATTACTGCTATTCTATTACTACTATCTTTA	Root	Metazoa	Arthropoda	Insecta	Diptera	Chironomidae	Procladius	Procladius sp. 1	30347	0	0	0	0	0	0	0	0	0	0	0	0	0	0	0	0	0	0	0	0	0	0	0	0	0	0	0	0	0	0	0	0	0	0	0	0	0	0	0
ASV146	TTTAGCGTCTGGAATTGCACATGCTGGGGCTTCAGTTGATTTAGCTATTTTTTCATTACATTTAGCCGGTGTCTCATCAATTTTAGGTGCAGTAAATTTTATTACAACAGTAATTAATATACGATCAAACGGAATTACATTAGATCGAATACCTTTATTTGTTTGATCAGTGATTATTACCGCTGTTTTATTACTATTATCTTTA	Root	Metazoa	Arthropoda	Insecta	Diptera	Chironomidae	Procladius	Procladius sp. 2	637	0	0	0	0	0	0	0	0	0	0	0	0	0	0	0	0	0	0	0	0	0	0	0	0	0	0	0	0	0	0	0	0	0	0	0	0	0	0	0
ASV147	TTTAGCATCTGGAATCGCACACGCTGGGGCCTCAGTTGATTTAGCTATTTTTTCATTACATTTAGCCGGTGTATCCTCAATTTTAGGTGCAGTAAATTTTATTACAACAGTAATTAATATACGATCAAACGGAATTACATTAGATCGAATACCTTTATTTGTTTGATCAGTAATTATTACTGCTATTTTATTACTATTATCTTTA	Root	Metazoa	Arthropoda	Insecta	Diptera	Chironomidae	Procladius	Procladius sp. MW283770.1	35598	0	0	0	0	0	0	0	0	0	0	0	0	0	0	0	0	0	0	0	0	0	0	0	0	0	0	0	0	0	0	0	0	0	0	0	0	0	1085	0
ASV148	TCTTGCATCTGGAATTGCCCATGCAGGAGCCTCTGTTGATTTAGCAATTTTTTCTTTACATCTCGCAGGTGTTTCTTCTATTTTAGGAGCTGTAAATTTTATTACCACAGTAATTAATATACGATCAAATGGAATTACTTTAGATCGAATACCATTATTTGTCTGATCAGTAGTAATTACTGCAGTATTATTACTTTTATCTTTA	Root	Metazoa	Arthropoda	Insecta	Diptera	Chironomidae	Procladius	Procladius villosimanus	715	0	0	0	0	0	0	0	0	0	0	0	0	0	0	0	0	0	0	0	0	0	0	0	0	0	0	0	0	0	0	0	0	0	0	0	0	0	0	0
ASV149	TTTATCAGCTAGAATTGCCCATAGAGGAAGTTCAGTAGATTTAGCAATTTTTTCACTTCATTTAGCAGGGATTTCATCAATTTTAGGTTCTGTAAATTTTATTACAACAGCAATTAATATACGATCTAATGGAATTACTTTAGATCGAATACCTTTATTTGTTTGATCTGTAATTATTACAACAATTCTTCTTCTTCTTTCACTT	Root	Metazoa	Arthropoda	Insecta	Diptera	Chironomidae	Tanytarsus	Tanytarsus bispinosus	399	0	0	0	0	0	0	0	0	0	0	0	0	0	0	0	0	0	0	0	0	0	0	0	0	0	0	0	0	0	0	0	0	0	0	0	0	0	0	0
ASV150	TTTATCATCCAGAATTGCTCATAGAGGAGCTTCTGTAGACCTAGCCATTTTTTCTCTTCATTTAGCTGGAGTCTCTTCAATCTTAGGATCAGTAAATTTTATTACTACAGCTATTAACATACGATCAAACGGAATTACCCTTGATCGAATACCTTTATTTGTCTGATCTGTTGTAATTACAACAATTTTATTGTTACTTTCACTT	Root	Metazoa	Arthropoda	Insecta	Diptera	Chironomidae	Tanytarsus	Tanytarsus fuscithorax	272853	0	0	0	0	0	0	0	0	0	0	0	0	0	0	0	0	0	0	0	0	0	0	0	0	0	0	0	0	0	0	0	0	0	0	0	0	0	0	0
ASV151	TTTATCATCTAGAATTGCTCATAGAGGAGCCTCTGTTGATTTAGCTATTTTTTCTTTACATTTAGCAGGTATTTCCTCAATTTTAGGATCAGTAAATTTTATTACAACAGCTATTAATATACGATCTAATGGGATTACTTTAGATCGAATACCATTATTTGTTTGATCCGTTATCATTACAACCATTTTACTTTTACTTTCTTTA	Root	Metazoa	Arthropoda	Insecta	Diptera	Chironomidae	Tanytarsus	Tanytarsus semibarbitarsus	31441	27	2	0	0	0	0	0	0	0	23419	4	4	0	2	0	0	0	0	1	0	1	2	0	0	0	0	0	0	4	4	0	0	0	0	1	0	0	0	0
ASV152	CCTTTCATCAATTATTGCTCATGGAGGAGCTTCAGTTGATTTAGCTATTTTTTCATTACATTTAGCTGGAGTATCTTCTATTTTAGGAGCAGTAAATTTTATTACTACAGTAATTAATATACGATCAGCAGGTATTACCTTCGATCAAATACCCTTATTTGTTTGATCAGTAGTAATTACTGCTTTATTATTACTTTTATCTCTT	Root	Metazoa	Arthropoda	Insecta	Diptera	Chironomidae sp.	Chironomidae sp.	Chironomidae sp. 5	178	0	0	0	0	0	0	0	51	42	0	0	0	0	0	0	0	0	0	0	0	5	19	0	0	0	0	0	0	0	0	0	0	0	0	0	0	0	0	0
ASV153	ATTATCTTCAATTATCGCTCATGGAGGAGCTTCTGTTGATTTAGCAATTTTCTCACTTCATTTAGCAGGAGTATCATCTATTTTAGGAGCTGTAAATTTTATTACAACTGTAATTAATATACGAGCTACTGGAATTACTTTTGATCGAATACCATTATTTGTCTGATCAGTAGTAATTACTGCTTTATTGTTATTATTATCATTA	Root	Metazoa	Arthropoda	Insecta	Diptera	Chloropidae	Chloropidae sp.	Chloropidae sp. 1	14700	0	0	0	0	0	0	0	4360	3734	0	0	0	0	0	0	0	0	0	0	0	0	0	0	4	160	155	0	0	0	0	0	0	0	0	0	280	623	0	0
ASV154	ATTATCATCTATTATCGCTCATGGTGGAGCTTCTGTTGATTTAGCTATTTTTTCATTACATTTAGCAGGAGTATCTTCAATTTTAGGGGCTGTAAATTTCATTACAACAGTAATTAATATGCGATCAACAGGAATTACATTTGATCGAATACCATTATTTGTTTGATCAGTAGTAATTACAGCTTTACTATTATTATTATCACTA	Root	Metazoa	Arthropoda	Insecta	Diptera	Chloropidae	Chloropidae sp.	Chloropidae sp. 10	189	0	0	0	0	0	0	0	0	0	0	0	0	0	0	0	0	0	0	0	0	0	0	0	0	0	0	0	0	0	0	0	0	0	0	0	0	0	0	0
ASV155	TCTTTCATCTATTATTGCCCATGGAGGAGCTTCTGTTGATTTAGCAATTTTTTCTTTACATTTAGCAGGGGTGTCATCTATTCTAGGAGCAGTAAATTTTATTACAACAGTAATTAATATACGATCAACAGGAATTACTTTTGATCGAATACCTTTATTTGTTTGATCAGTTGTAATTACTGCTTTATTATTATTATTATCTTTA	Root	Metazoa	Arthropoda	Insecta	Diptera	Chloropidae	Chloropidae sp.	Chloropidae sp. 11	51	0	0	0	0	0	0	0	0	0	0	0	0	0	0	0	0	0	0	0	0	29	22	0	0	0	0	0	0	0	0	0	0	0	0	0	0	0	0	0
ASV156	CCTTTCTTCTATTATTGCTCATGGAGGAGCTTCAGTTGATTTAGCTATTTTTTCATTACATTTAGCTGGAGTATCCTCAATTTTAGGAGCAGTAAATTTTATTACTACAGTAATTAATATACGATCAACAGGAATTACATTTGATCGAATACCTTTATTTGTTTGATCAGTTGTAATTACTGCTTTATTACTTCTTCTTTCACTT	Root	Metazoa	Arthropoda	Insecta	Diptera	Chloropidae	Chloropidae sp.	Chloropidae sp. 2	5880	0	0	0	0	0	0	0	0	0	0	0	0	0	0	0	0	0	0	0	0	0	0	0	0	0	0	0	0	0	0	0	0	0	0	0	0	0	0	0
ASV157	TTTATCTTCAATTATTGCTCATGGAGGAGCTTCAGTTGATTTAGCAATTTTTTCACTTCATTTAGCCGGAGTTTCTTCAATTTTAGGAGCTGTAAATTTTATTACAACTGTAATTAATATACGAGCAACAGGAATTACTTTTGATCGAATACCATTATTTGTTTGATCAGTAGTAATTACTGCTTTACTATTACTATTGTCATTA	Root	Metazoa	Arthropoda	Insecta	Diptera	Chloropidae	Chloropidae sp.	Chloropidae sp. 3	1013	0	0	0	0	0	0	0	0	0	0	0	0	0	0	0	0	0	0	0	0	0	0	0	0	0	0	0	0	0	0	0	0	0	0	0	0	0	0	0
ASV158	ACTTTCCTCAATTATTGCTCATGGAGGAGCTTCAGTTGATTTAGCAATTTTTTCACTCCACTTAGCAGGAGTCTCTTCAATTTTAGGAGCAGTTAATTTTATTACTACAGTAATTAATATGCGAGCTACAGGAATTACATTTGATCGAATACCTTTATTTGTATGATCAGTAGTAATTACTGCTTTATTACTTTTATTATCATTA	Root	Metazoa	Arthropoda	Insecta	Diptera	Chloropidae	Chloropidae sp.	Chloropidae sp. 4	908	0	0	0	0	0	0	0	0	0	0	0	0	0	0	0	0	0	0	0	0	0	0	0	0	0	0	0	0	0	0	0	0	0	0	0	0	0	0	0
ASV159	GTTATCTTCAATTATTGCTCATGGAGGAGCTTCAGTTGATTTAGCAATTTTCTCACTTCATTTAGCTGGAGTATCATCAATTTTAGGAGCTGTAAATTTTATTACAACTGTAATTAATATACGAGCAACAGGAATTACCTTTGATCGAATACCATTATTTGTTTGATCAGTAGTAATTACTGCATTATTATTATTATTATCATTA	Root	Metazoa	Arthropoda	Insecta	Diptera	Chloropidae	Chloropidae sp.	Chloropidae sp. 5	843	0	0	0	0	0	0	0	0	0	0	0	0	0	0	0	0	0	0	0	0	0	0	0	0	0	0	0	0	0	0	0	0	0	0	0	0	0	0	0
ASV160	TCTTTCATCTATTATTGCTCATGGAGGAGCTTCAGTTGATTTAGCTATTTTTTCTCTTCATTTAGCTGGAGCATCTTCTATTTTAGGAGCAGTAAATTTTATTACTACAGTAATTAATATACGATCAACAGGTATCACATTTGATCGAATACCTTTATTTGTATGATCAGTAGTAATTACTGCATTATTATTGTTATTATCATTA	Root	Metazoa	Arthropoda	Insecta	Diptera	Chloropidae	Chloropidae sp.	Chloropidae sp. 6	516	0	0	0	0	0	0	0	0	0	0	0	0	0	0	0	0	0	0	0	0	0	0	0	0	0	0	0	0	0	0	0	0	0	0	0	0	0	0	0
ASV161	ATTATCATCTAACATTGCTCATGGAGGAGCCTCTGTTGATTTAGCTATTTTTTCTCTTCATTTAGCGGGAGTATCTTCTATTTTAGGGGCTGTAAATTTTATTACAACAGTTATTAATATACGATCAACAGGAATTACTTTTGACCGAATACCATTATTTGTATGATCAGTAGTAATTACAGCTTTATTGTTATTACTTTCACTA	Root	Metazoa	Arthropoda	Insecta	Diptera	Chloropidae	Chloropidae sp.	Chloropidae sp. 7	364	0	0	0	0	0	0	0	0	0	0	0	0	0	0	0	0	0	0	0	0	0	0	0	0	0	0	0	0	0	0	0	0	0	0	0	0	0	364	0
ASV162	TTTGTCATCTATTATTGCTCATGGAGGAGCTTCAGTTGATTTAGCTATTTTTTCATTACATCTAGCTGGAGTATCTTCTATTTTAGGAGCAGTAAATTTTATTACTACAGTTATTAATATACGATCAACTGGAATTACATTTGACCGAATACCTTTATTTGTGTGATCAGTAGTAATTACTGCCTTATTATTACTACTATCATTA	Root	Metazoa	Arthropoda	Insecta	Diptera	Chloropidae	Chloropidae sp.	Chloropidae sp. 8	421	0	0	0	0	0	0	0	0	0	0	0	0	0	0	0	0	0	0	0	0	0	0	0	0	0	0	0	0	0	0	0	0	0	0	0	0	0	0	0
ASV163	ATTATCATCAGTTATTGCTCATGGAGGAGCTTCGGTTGATTTAGGTATGTTTTCACTACATTTAGCAGGAGTATCATCTATTCTAGGAGCTGTAAATTTTATGACTACAGTAATTAATATACGATCAAGTGGAATTACATTTGATCGAATACCTTTAGTTGTATGATCTGTAGCAATTACAGCATTATTACTACTATTATCTTTA	Root	Metazoa	Arthropoda	Insecta	Diptera	Chloropidae	Chloropidae sp.	Chloropidae sp. 9	39	0	0	0	0	0	0	0	0	0	0	0	0	5	15	0	0	0	0	0	0	0	0	0	0	0	0	0	0	0	0	0	0	0	12	7	0	0	0	0
ASV164	TTTATCATCTATTATTGCTCATGGAGGAGCTTCAGTTGATTTAGCTATTTTTTCATTACATTTAGCTGGAGTATCATCAATTCTAGGAGCAGTAAATTTTATTACTACAGTTATTAATATACGATCAACAGGAATTACTTTTGATCGAATACCATTATTTGTTTGATCAGTAGTAATTACCGCTTTATTATTATTATTATCACTA	Root	Metazoa	Arthropoda	Insecta	Diptera	Chloropidae	Chloropidae sp.	Chloropidae sp. nr OM601347.1	23753	0	0	0	0	0	2	4	11645	11770	0	0	0	0	0	0	0	0	0	0	0	0	0	0	10	0	0	0	0	0	0	0	0	0	0	0	0	0	0	0
ASV165	ACTTTCTTCTATTATTGCTCACGGAGGAGCTTCAGTTGATTTAGCAATTTTTTCATTACATTTAGCTGGAGTATCGTCAATTTTAGGAGCTGTAAATTTTATTACTACAGTAATTAATATACGATCTACAGGAATCACATTTGATCGAATACCATTATTTGTTTGATCAGTAGTAATTACAGCTTTATTATTACTTCTTTCTTTA	Root	Metazoa	Arthropoda	Insecta	Diptera	Chloropidae	Cloropidae sp.	Cloropidae sp. nr KY831280.1	42473	0	0	0	0	0	0	0	0	0	0	0	0	0	0	0	0	0	0	0	0	0	0	0	0	0	0	0	0	0	0	0	0	0	0	0	0	0	0	25065
ASV166	CCTTTCATCAATTATTGCTCATGGAGGAGCTTCAGTTGATTTAGCTATTTTTTCATTACATTTAGCTGGAGTATCTTCTATTTTAGGAGCAGTAAATTTTATTACTACAGTAATTAATATACGATCAGCAGGTATTACCTTTGATCGAATACCCTTATTTGTTTGATCAGTAGTAATTACTGCTTTATTATTACTTTTATCTCTT	Root	Metazoa	Arthropoda	Insecta	Diptera	Chloropidae	Conoscinella	Conoscinella sp.	48781	0	0	0	0	0	2577	2100	6872	7351	0	0	2	0	0	0	0	0	0	0	0	1511	1884	3	7	0	0	217	5583	0	0	0	0	0	0	0	0	0	0	0
ASV167	TTTATCTGCAGGTATTGCTCATGGAGGTGCTTCTGTTGATTTAGCTATTTTTTCTTTACATTTAGCCGGAATTTCATCAATTTTAGGAGCAGTAAATTTTATTACAACAGTAATTAATATGCGAACAACAGGAATTACATTTGATCGAATACCTTTATTTGTTTGATCTGTAGTAATTACAGCATTATTACTATTACTTTCATTA	Root	Metazoa	Arthropoda	Insecta	Diptera	Chloropidae	Elachiptera	Elachiptera sp.	1735	0	0	0	0	0	0	0	0	0	0	0	0	0	0	0	0	0	0	0	0	0	0	0	0	0	0	0	0	0	0	0	0	0	0	0	0	0	0	0
ASV168	ATTATCATCAGTTATTGCTCATGGAGGAGCTTCGGTTGATTTAGCTATTTTTTCTCTACATTTAGCAGGAGTATCCTCTATTTTAGGAGCTGTAAATTTTATTACTACAGTAATTAATATACGATCAAGTGGAATTACATTTGATCGAATACCTCTATTTGTATGATCTGTGGCAATTACAGCATTATTATTACTATTATCATTA	Root	Metazoa	Arthropoda	Insecta	Diptera	Chloropidae	Eribolus	Eribolus sp.	12365	0	15	23	0	0	2	2	1	0	0	0	0	2491	5241	0	0	0	0	0	0	0	0	5	5	0	0	0	0	0	0	0	0	0	2307	1921	0	0	0	0
ASV169	ACTATCATCTACTATTGCTCATGGAGGAGCTTCAGTTGATTTCGCAATTTTTTCATTACATTTAGCTGGAATTTCATCAATTTTAGGAGCAGTAAATTTTATTACAACAGTCATTAATATACGATCTACAGGAATTACATTTGATCGAATACCACTATTTGTTTGATCAGTATTAATTACTGCTTTATTATTACTATTATCATTG	Root	Metazoa	Arthropoda	Insecta	Diptera	Chloropidae	Olcella	Olcella sp. 1	6976	0	0	0	0	0	0	0	0	0	0	0	0	28	69	0	0	0	0	0	0	0	0	0	0	0	0	16	230	0	0	2031	1593	0	646	488	131	153	0	0
ASV170	TTTATCATCAATTATTGCTCATGGAGGAGCTTCTGTTGATTTAGCTATTTTTTCTCTTCATTTAGCAGGAGTTTCATCAATTTTAGGAGCTGTAAATTTTATTACAACAGTAATTAATATACGATCAACAGGAATTACATTTGATCGAATACCTTTATTTGTTTGATCCGTAGTAATTACTGCTTTACTTTTATTACTTTCATTA	Root	Metazoa	Arthropoda	Insecta	Diptera	Chloropidae	Olcella	Olcella sp. 2	1863	0	0	0	0	0	0	0	0	0	0	0	0	0	0	0	0	0	0	0	0	0	0	0	0	0	0	0	0	0	0	0	0	0	0	0	0	0	0	0
ASV171	ACAATCATCTATTATTGCTCATGGGGGAGCTTCAGTTGATTTAGCAATTTTTTCATTACATTTAGCTGGAGTTTCATCAATTTTAGGAGCAGTAAATTTTATTACAACAGTAATTAATATACGATCTACAGGAATTACATTTGATCGAATACCATTATTTGTTTGATCAGTAGTAATTACTGCTTTATTATTATTATTATCATTG	Root	Metazoa	Arthropoda	Insecta	Diptera	Chloropidae	Olcella	Olcella sp. 3	568	0	0	0	0	0	0	0	0	0	0	0	0	2	5	0	0	0	0	0	0	0	0	0	0	0	0	0	12	0	0	203	223	0	24	23	6	13	0	0
ASV172	ACTATCATCTATTATTGCTCATGGAGGAGCTTCAGTTGATTTGGCAATTTTTTCATTACATTTAGCTGGAGTTTCATCAATTTTAGGAGCAGTAAATTTTATTACAACAGTCATTAATATACGATCTACAGGAATTACATTTGATCGAATACCATTATTTGTTTGATCAGTAGTAATTACTGCTTTATTATTATTATTATCATTA	Root	Metazoa	Arthropoda	Insecta	Diptera	Chloropidae	Olcella	Olcella sp. 4	234	0	0	0	0	0	0	0	0	0	0	0	0	0	0	0	0	0	0	0	0	0	0	0	0	0	0	0	0	0	0	19	17	0	59	38	0	0	0	0
ASV173	TTTATCATCTATTATTGCCCACGGAGGGGCCTCAGTTGATTTAGCTATTTTTTCATTGCATTTAGCTGGAGTATCATCAATTTTAGGAGCAGTAAATTTCATTACAACAGTTATTAATATACGATCTACATGAATTACTTTTGATCGAATACCATTATTTGTTTGATCAGTAGTAATTACTGCTTTACTATTATTACTTTCATTA	Root	Metazoa	Arthropoda	Insecta	Diptera	Chloropidae	Olcella	Olcella sp. 5	39	0	0	0	0	0	0	0	21	18	0	0	0	0	0	0	0	0	0	0	0	0	0	0	0	0	0	0	0	0	0	0	0	0	0	0	0	0	0	0
ASV174	ACTATCATCTATTATTGCTCATGGGGGAGCTTCAGTTGATTTGGCAATTTTTTCATTACATTTAGCTGGGATTTCATCAATTTTAGGGGCGGTAAATTTTATTACAACAGTTATTAATATACGATCTACAGGAATTACATTTGATCGAATACCATTATTTGTTTGATCGGTAGTAATTACTGCTTTATTACTATTATTATCATTA	Root	Metazoa	Arthropoda	Insecta	Diptera	Chloropidae	Olcella	Olcella sp. 6	124998	0	6	3	0	0	0	0	0	0	0	0	0	693	1462	0	0	0	0	0	0	0	0	0	6	0	0	21	456	0	5	57371	43168	0	303	247	1639	2086	0	0
ASV175	ACTATCATCTATTATTGCTCATGGAGGAGCTTCAGTTGATTTAGCAATTTTTTCATTACATTTAGCTGGAATTTCATCAATTTTAGGAGCAGTAAATTTTATTACAACAGTCATTAATATACGATCTACAGGAATTACATTTGATCGAATACCATTATTTGTTTGATCAGTAGTAATTACTGCTTTATTATTATTATTATTATCATTA	Root	Metazoa	Arthropoda	Insecta	Diptera	Chloropidae	Olcella	Olcella sp. nr JF871961.1	869	0	0	0	0	0	0	0	0	0	0	0	0	3	4	0	0	0	0	0	0	0	0	0	0	0	0	4	28	0	0	364	269	0	0	0	10	18	0	0
ASV176	ACTATCATCTATTATTGCTCATGGAGGAGCTTCAGTTGATTTAGCAATTTTTTCATTACATTTAGCTGGAGTTTCATCAATTTTAGGAGCAGTAAATTTTATTACAACAGTTATTAATATACGATCTACAGGAATTACATTTGATCGAATACCATTATTTGTTTGATCAGTAGTAATTACTGCTTTATTATTATTATTATCATTA	Root	Metazoa	Arthropoda	Insecta	Diptera	Chloropidae	Olcella	Olcella sp. nr KR691007.1	149	0	0	0	0	0	0	0	0	0	0	0	0	0	0	0	0	0	0	0	0	0	0	0	0	0	0	0	0	0	0	0	0	0	0	0	0	0	0	0
ASV177	TCTTTCATCTATTATTGCTCATGGAGGAGCTTCTGTTGATTTAGCAATTTTTTCTTTACATTTAGCAGGAGTATCCTCAATTTTAGGAGCAGTAAATTTTATTACAACAGTAATTAACATACGATCAACAGGAATTACTTTTGATCGAATGCCTTTATTTGTTTGATCAGTTGTAATTACTGCCTTATTATTATTATTATCTTTA	Root	Metazoa	Arthropoda	Insecta	Diptera	Chloropidae	Thaumatomyia	Thaumatomyia sp.	3386	0	0	0	0	0	0	0	0	0	0	0	0	0	0	0	0	0	0	0	0	1666	1720	0	0	0	0	0	0	0	0	0	0	0	0	0	0	0	0	0
ASV178	ACTTTCATCTGGAACAGCACATGCAGGAGCTTCAGTAGATTTAGCTATTTTTTCTTTACATTTAGCTGGGATTTCTTCTATTTTAGGAGCAGTAAATTTTATTACAACAGTAATTAATATGCGATCATCTGGGATTACCCTTGATCGAATACCATTATTTGTTTGATCAGTAGTAATTACTGCTGTTCTATTACTTCTTTCTCCT	Root	Metazoa	Arthropoda	Insecta	Diptera	Culicidae	Culex	Culex annulirostris	14	0	0	0	0	0	0	0	0	0	0	0	0	0	0	0	0	0	0	0	0	0	0	0	0	0	0	0	0	0	0	0	0	0	0	0	0	0	0	0
ASV179	TCTTTCATCTGGAACAGCTCATGCTGGAGCTTCAGTAGACTTAGCTATTTTTTCTTTACATCTAGCAGGAATTTCATCAATTTTAGGAGCAGTAAATTTTATTACAACAGTAATTAATATACGATCTTCAGGAATTACTCTTGATCGAATACCTTTATTTGTTTGATCAGTAGTAATTACTGCAGTATTATTACTTCTTTCTTTA	Root	Metazoa	Arthropoda	Insecta	Diptera	Culicidae	Culex	Culex australicus	370908	0	0	0	0	0	0	0	0	0	5752	15828	9260	0	0	5796	6308	0	0	0	0	0	0	0	0	0	0	0	0	0	0	0	0	0	1110	860	0	0	0	0
ASV180	TCTTTCATCTGGAACAGCTCATGCTGGAGCTTCAGTAGACTTAGCTATTTTTTCTTTACATTTAGCAGGAATTTCATCAATTTTAGGTGCAGTAAATTTTATTACAACAGTAATTAATATACGATCTTCAGGAATTACTCTTGATCGAATACCTTTATTTGTTTGATCAGTAGTAATTACTGCAGTTTTATTACTTCTTTCTTTA	Root	Metazoa	Arthropoda	Insecta	Diptera	Culicidae	Culex	Culex molestus/quinquefasciatus	87639	0	0	0	0	0	0	0	0	0	0	0	0	0	0	0	0	0	0	0	0	0	0	0	0	0	0	0	0	0	0	0	0	0	627	545	0	0	0	0
ASV181	TTTATCGTCAGGAATTGCTCATAGAGGAGCATCAGTAGATCTAGCAATTTTTTCTTTACATCTTGCAGGTGTATCTTCAATTTTAGGAGCAGTAAATTTTATTACAACAGTAATTAATATACGATCACCAGGAATTACATTAGATCGAATACCTTTATTTGTTTGATCAGTTGTTATTACTGCTCTTCTACTTCTTTTATCACTC	Root	Metazoa	Arthropoda	Insecta	Diptera	Diastatidae	Diastatidae sp.	Diastatidae sp.	4265	0	0	0	0	0	0	0	0	0	0	0	0	0	0	0	0	0	0	0	0	0	0	0	0	0	0	0	0	0	0	0	0	0	0	0	0	0	0	0
ASV182	TTTATCAGCTGGAATTGCTCATGCGGGGGCTTCTGTAGATTTAGCTATTTTTTCCTTACATTTAGCGGGGGTTTCTTCAATTTTAGGTGCTGTAAATTTTATTACAACAGTAATTAATATACGATCTACAGGAATTACATTTGATCGAATACCTCTCTTTGTTTGAGCTGTTGTAATTACAGCAGTATTATTACTGTTATCCTTA	Root	Metazoa	Arthropoda	Insecta	Diptera	Diptera sp.	Diptera sp.	Diptera sp. 1	44173	0	0	0	0	0	0	0	0	0	0	0	0	0	0	16746	17110	0	0	0	0	0	0	0	0	0	0	0	0	0	0	0	0	0	0	0	0	0	0	0
ASV183	ACTTTCTGCAGGTATTGCTCACGGAGGGGCTTCAGTTGATTTAGCAATTTTTTCATTACACTTAGCCGGAATTTCTTCAATTTTAGGAGCAGTTAATTTTATTACTACTGTAATTAATATACGATCTACAGGAATTACTTTTGATCGAATACCTCTATTTGTATGATCTGTAGTAATCACTGCATTATTACTTCTACTATCTTTA	Root	Metazoa	Arthropoda	Insecta	Diptera	Diptera sp.	Diptera sp.	Diptera sp. 10	3501	0	0	0	0	0	0	0	0	0	0	0	0	0	0	0	0	0	0	0	0	0	0	0	0	0	0	0	0	0	0	0	0	0	0	0	0	0	0	0
ASV184	ATTATCTGCAGGAATTGCTCATGGAGGAGCCTCAGTAGACTTAGCAATTTTTTCCCTTCATTTAGCCGGAGTATCATCTATTTTAGGAGCAGTAAATTTCATTACCACAGTAATTAATATACGATCTCCAGGAATTTCATTTGATCGAATACCACTATTTGTATGATCAGTAGTAATTACAGCACTATTATTATTACTTTCATTA	Root	Metazoa	Arthropoda	Insecta	Diptera	Diptera sp.	Diptera sp.	Diptera sp. 11	3281	0	0	0	0	0	0	0	0	0	0	0	0	0	0	0	0	0	0	0	0	0	0	0	0	0	0	0	0	0	0	0	0	0	0	0	0	0	0	0
ASV185	TTTATCTTCTAATATTGCTCATGGAGGAGCCTCTGTTGATTTAGCAATTTTCTCTCTTCATTTAGCAGGAATTTCTTCAATTTTAGGAGCCGTAAATTTTATTACTACCGTAATTAATATACGATCAACAGGAATTACATTTGACCGAATACCACTATTTGTTTGATCAGTAGTAATTACAGCTTTATTACTTTTGTTATCTTTA	Root	Metazoa	Arthropoda	Insecta	Diptera	Diptera sp.	Diptera sp.	Diptera sp. 12	2623	0	0	0	0	0	0	0	0	0	0	0	0	0	0	0	0	0	0	0	0	0	0	0	0	0	0	0	0	0	0	0	0	0	0	0	0	0	0	0
ASV186	TTTATCTGGTGGAATTGCACATGGAGGAGCTTCAGTAGATTTAGCTATTTTCTCTTTACATTTAGCTGGAATTTCTTCTATTTTAGGAGCAGTAAATTTTATTACAACTGTAATTAATATACGAGCTACAGGAATTACATTTGATCGAATACCTTTATTTGTATGATCAGTAGTAATTACAGCCTTATTATTACTACTTTCATTA	Root	Metazoa	Arthropoda	Insecta	Diptera	Diptera sp.	Diptera sp.	Diptera sp. 13	2179	0	3	1	0	0	3	0	0	0	0	0	0	329	748	0	0	0	0	0	0	0	0	0	0	0	0	0	0	0	0	0	0	0	0	0	0	0	0	0
ASV187	TTTATCAGCTGGAATTGCCCATGGCGGAGCTTCTGTCGATTTAGCCATTTTTTCTTTACATTTAGCAGGAATTTCTTCAATTTTAGGGGCTGTAAATTTTATTACAACAGTAATTAATATACGATCTACAGGAATTACTTTTGACCGAATACCTTTATTTGTTTGATCAGTTGTAATTACAGCTATTTTACTTTTATTATCTTTA	Root	Metazoa	Arthropoda	Insecta	Diptera	Diptera sp.	Diptera sp.	Diptera sp. 14	2060	0	0	0	0	0	0	0	0	0	0	0	0	0	0	0	0	0	0	0	0	0	0	0	0	0	0	0	0	0	0	0	0	0	0	0	0	0	0	0
ASV188	TTTATCATCAATTATTGCACATGGAGGTGCTTCTGTTGATTTAGCAATTTTTTCTCTTCATTTAGCTGGAGTATCCTCTATTTTAGGAGCAGTAAATTTCATCACTACAGTAATTAATATACGATCAACTGGAATCACATTTGACCGAATACCTTTATTTGTATGATCTGTTGTTATTACTGCTTTACTTTTACTTTTATCATTA	Root	Metazoa	Arthropoda	Insecta	Diptera	Diptera sp.	Diptera sp.	Diptera sp. 15	1851	0	0	0	0	0	0	0	0	0	0	0	0	0	0	0	0	0	0	0	0	0	0	0	0	0	0	0	0	0	0	0	0	0	0	0	0	0	0	0
ASV189	TCTTTCTAGAGGAATTGCCCATGGAGGAGCTTCAGTAGATTTAGCTATTTTTTCACTTCATTTAGCAGGAATTTCTTCTATTTTAGGAGCAGTAAATTTTATCACAACTGTAATTAATATGCGAGCTACAGGAATTACTTTTGATCGAATACCTCTATTTGTGTGATCAGTTGTTATTACAGCTTTATTATTATTACTATCTTTA	Root	Metazoa	Arthropoda	Insecta	Diptera	Diptera sp.	Diptera sp.	Diptera sp. 16	957	0	0	0	0	0	0	1	0	0	0	0	2	0	0	0	0	0	0	0	0	0	0	204	392	0	0	0	0	0	0	0	0	0	0	0	0	0	295	0
ASV190	CCTTTCTTCTACCTTATCTCATTCTGGAGCTTCTGTTGATTTATCAATTTTTTCTCTTCATTTAGCAGGAATTTCATCAATTTTAGGGGCAGTAAATTTTATTTCTACAATTATTAATATACGGGCACCAGGAATATCTTTTGATAAAATACCTTTATTTGTTTGATCTGTTTTAATTACAGCTATTTTATTACTTTTATCTTTA	Root	Metazoa	Arthropoda	Insecta	Diptera	Diptera sp.	Diptera sp.	Diptera sp. 17	678	0	0	0	0	0	0	0	0	0	0	0	0	0	0	0	0	0	0	0	0	0	0	0	0	0	0	0	0	0	0	0	0	0	0	0	0	0	0	0
ASV191	TCTTTCATCAATTATTGCTCACGGAGGAGCTTCAGTAGATTTAGCAATTTTTTCTTTACATTTAGCTGGAGTTTCATCAATTTTAGGGGCAGTAAATTTCATTACTACAGTAATTAATATACGATCAACAGGAATTACATTTGACCGAATACCATTATTTGTATGATCTGTAGTAATTACAGCCCTATTATTACTACTATCATTA	Root	Metazoa	Arthropoda	Insecta	Diptera	Diptera sp.	Diptera sp.	Diptera sp. 18	522	0	0	0	0	0	0	0	0	0	0	0	0	0	0	0	0	0	0	0	0	0	0	0	0	0	0	0	0	0	0	0	0	0	0	0	0	0	0	0
ASV192	TTTATCTTCAATTATTGCTCATGGAGGAGCTTCAGTTGATTTAGCAATTTTTTCACTTCATTTAGCCGGAGTTTCTTCAATTTTAGGAGCTGTAAATTTTATTACAACTGTAATTAATATACGAGCAACAGGAATTACTTTTGATCGAATACCATTATTTGTTTGATCAGTAGTAATTACTGCTTTACTATTACTATTGTCATTG	Root	Metazoa	Arthropoda	Insecta	Diptera	Diptera sp.	Diptera sp.	Diptera sp. 19	284	0	0	0	0	0	0	0	0	0	0	0	0	0	0	0	0	0	0	0	0	0	0	0	0	0	0	0	0	0	0	0	0	0	0	0	0	0	0	0
ASV193	ATTAGCAGCAAATGTATCACATGCTGGAGCTTCTGTAGATTTAGCAATTTTTTCTCTTCATTTAGCAGGGATCTCTTCTATTTTAGGGGCAGTAAATTTTATTACTACTATTATTAATATACGATCAACAGGAATTACTTTTGATCGAATACCTTTGTTTGTTTGATCAGTATTTATTACAGCCATTTTACTATTACTTTCTCTT	Root	Metazoa	Arthropoda	Insecta	Diptera	Diptera sp.	Diptera sp.	Diptera sp. 2	51173	0	0	0	0	0	0	0	0	0	0	0	0	0	0	0	0	197	419	0	0	0	0	0	0	0	0	0	0	0	0	0	0	0	0	0	0	0	0	0
ASV194	ACTATCATCTAATATTGCACACGGAGGAGCTTCTGTTGATTTAACTATTTTTTCCCTTCATTTAGCAGGAATTTCATCTATTTTAGGAGCTGTTAATTTTATTACAACTGTTAATAATATACGATCAACAGGAATTACTTTTGACCGAATACCATTATTTGTTTGATCAGTAGTAATTACAGCTCTATTACTTTTATTATCCTTA	Root	Metazoa	Arthropoda	Insecta	Diptera	Diptera sp.	Diptera sp.	Diptera sp. 20	561	0	0	0	0	0	0	0	0	0	0	0	0	0	0	0	0	0	0	0	0	0	0	0	0	0	0	0	0	0	0	0	0	0	0	0	0	0	0	0
ASV195	GCTATCTTCTGGGATTGCTCATGGAGGAGCTTCAGTTGATTTAGCTATTTTTTCATTACATTTAGCAGGAATTTCTTCAATTTTAGGAGCAGTAAATTTTATTACAACAGCAATTAATATACGTTCTACAGGAATTACTTTTCATCGAATACCTTTATTTGTATGATCTGTAGTAATAACAGTTCTTTTATTACTTTTATCTTTA	Root	Metazoa	Arthropoda	Insecta	Diptera	Diptera sp.	Diptera sp.	Diptera sp. 21	57	0	0	0	0	0	0	0	0	0	0	0	0	0	0	0	0	0	0	0	0	27	16	0	0	0	0	0	0	0	0	0	0	0	9	5	0	0	0	0
ASV196	GCTTTCAGCAGGGATTGCTCATGGAGGTGCTTCTGTTGATTTAACTATTTTTTCTTTACATTTAGCTGGAATTTCTTCAATTTTAGGAGCAGTTAATTTTATTACAACTGTAATTAATATACGAGCTACTGGAATTTCTTTTGATCGAATACCTTTATTTGTTTGATCAGTTGTTATTACCGCTATTTTATTACTTTTATCTTTA	Root	Metazoa	Arthropoda	Insecta	Diptera	Diptera sp.	Diptera sp.	Diptera sp. 22	2007	0	0	0	0	0	0	0	0	0	0	0	0	0	0	0	0	0	0	0	0	0	0	0	0	0	0	0	0	0	0	0	0	0	0	0	0	0	0	0
ASV197	GTTATCTACAACAATTTCGCATTCTGGTGCATCAGTAGATTTATCAATTTTCTCATTACATTTAGCTGGTATTTCTTCAATTTTGGGGGCTGTTAATTTTATTTCTACAATTATCAATATACGAACTCCTGGAATAACTTTTGATAAAATACCATTATTTGTTTGATCTGTATTAATTACTGCAATCCTTTTATTATTATCTTTA	Root	Metazoa	Arthropoda	Insecta	Diptera	Diptera sp.	Diptera sp.	Diptera sp. 23	1674	0	0	0	0	0	0	0	0	0	0	0	0	0	0	0	0	0	0	0	0	0	0	0	0	0	0	0	0	0	0	0	0	0	0	0	0	0	0	0
ASV198	TCTATCTTCTGGAATTGCTCACGGAGGGGCATCAGTTGATCTAGCAATTTTTTCTTTACATATAGCCGGAATTTCCTCAATTTTAGGAGCAGTAAATTTTATTACTACTGTAATTAATATACGAGCCACCGGAATTACCTTTGACCGAATACCACTATTTGTTTGATCTGTTGTAATTACAGCAATCCTTCTTCTGCTTTCCCTT	Root	Metazoa	Arthropoda	Insecta	Diptera	Diptera sp.	Diptera sp.	Diptera sp. 24	1637	0	0	0	0	0	0	0	0	0	0	0	0	0	0	0	0	0	0	0	0	0	0	0	0	0	0	0	0	0	0	0	0	0	0	0	632	744	261	0
ASV199	TTTGTCAAGAAATATTGCCCACTCAGGAGCTTCTGTAGATTTAGCTATTTTCAGACTTCATTTAGCAGGAGTATCTTCTATTTTAGGAGCAATTAATTTTATTACAACAATTTTAAATATACGCCCTTATGGAATATCTTTAGATCGAATACCTTTATTTGTTTGATCAGTAGGAATTACAGCTTTATTATTACTTTTATCTTTA	Root	Metazoa	Arthropoda	Insecta	Diptera	Diptera sp.	Diptera sp.	Diptera sp. 25	1207	0	0	0	0	0	0	0	0	0	0	0	0	0	0	0	0	0	0	0	0	0	0	0	0	0	0	0	0	0	0	0	0	0	0	0	0	0	0	0
ASV200	TTTATCTTCAGGAATTGCTCATAGTGGTGCTTCTGTAGATTTAGCAATTTTTTCCCTTCATTTAGCAGGGGTTTCTTCTATTTTAGGTGCAGTAAATTTTATTACAACAGTAATTAATATACGATCTCCTGGAATTACCCTAGATCGAATACCTTTATTTGTTTGATCCGTTGTTATTACAGCCCTTCTTCTTCTTCTTTCATTA	Root	Metazoa	Arthropoda	Insecta	Diptera	Diptera sp.	Diptera sp.	Diptera sp. 26	1006	0	0	0	0	0	0	0	0	0	0	0	0	0	0	0	0	0	0	0	0	0	0	0	0	0	0	0	0	0	0	0	0	0	0	0	0	0	0	0
ASV201	TCTATCCTCAGGAATCGCTCATGGAGGAGCTTCTGTCGACTTAGCAATTTTCTCTCTTCATTTAGCAGGTATTTCTTCTATTTTAGGTGCCGTAAACTTTATTACTAAAGTCATTAATATACGATCAACAGGAATTACTTTTGATCGAATATCATTATTTGTATGATCTGTTGTAATTACTGCAATTCTTTTTCTTCTTTCCTTC	Root	Metazoa	Arthropoda	Insecta	Diptera	Diptera sp.	Diptera sp.	Diptera sp. 27	339	0	0	0	0	0	0	0	0	0	0	0	0	0	0	0	0	0	0	0	0	0	0	0	0	0	0	0	0	0	0	0	0	0	0	0	0	0	0	0
ASV202	TTTATCCTCAGGAATTGCCCATAGAGGTGCTTCAGTTGATTTAGCTATTTTTTCTCTTCACCTTGCAGGTATTTCTTCAATTCTAGGAGCTGTTAATTTCATTACAACAGTAATTAATATACGATCTCCTGGAATTTCATTAGACCGAATACCTTTATTTGTTTGGTCAGTTGTTATTACAGCTTTACTACTTCTTCTTTCTCTC	Root	Metazoa	Arthropoda	Insecta	Diptera	Diptera sp.	Diptera sp.	Diptera sp. 28	258	93	0	0	0	0	0	0	0	0	0	0	0	0	0	0	0	0	0	0	0	0	0	0	0	0	0	0	0	0	0	0	0	0	0	0	0	0	0	0
ASV203	CCTTTCTTCCGGAATTGCTCATAGAGGAGCTTCAGTTGACTTAGCTATTTTTTCTCTTCATTTAGCCGGGATTTCTTCTATTTTAGGAGCAGTAAATTTTATTACAACTGTAATTAATATACGATCACCAGGAATCTCATTTGACCGAATACCTTTATTTGTATGATCAGTTGTTATTACAGCTCTTCTTCTTTTACTTTCTTTA	Root	Metazoa	Arthropoda	Insecta	Diptera	Diptera sp.	Diptera sp.	Diptera sp. 29	218	0	0	0	0	0	0	0	0	0	0	0	0	0	0	0	0	0	0	0	0	0	0	0	0	0	0	0	0	0	0	0	0	0	0	0	0	0	0	0
ASV204	CTTATCCGCCACTATTGCTCATGCCGGAGCTTCTGTTGATTTAGCAATTTTCTCTCTTCATTTAGCTGGAATTTCCTCAATTTTAGGGGCAGTTAATTTTATTACAACCATTATTAATATACGTAGCCCAGGAATTTCATTTGACCGAATACCTCTATTTGTATGATCAGTATTTATCACTGCTATTTTATTACTTTTATCTTTA	Root	Metazoa	Arthropoda	Insecta	Diptera	Diptera sp.	Diptera sp.	Diptera sp. 3	18303	77	0	0	0	0	0	0	0	0	0	17	5	0	0	0	0	0	0	1	3	2	7	0	0	0	0	0	0	0	0	0	0	0	0	0	0	0	0	0
ASV205	ATTATCAGCAAATATCGCACATGCCGGAGCATCTGTTGACCTAGCAATTTTTTCTTTACATTTAGCAGGTATTTCTTCCATTTTAGGAGCAGTAAACTTTATTACCACAATTATTAATATACGATCAAATGGTATTTCTTTTGATCGAATACCTTTATTTGTTTGATCAGTATTAATTACAGCTATTCTTCTACTTTTATCATTA	Root	Metazoa	Arthropoda	Insecta	Diptera	Diptera sp.	Diptera sp.	Diptera sp. 30	211	0	0	0	0	0	0	0	0	0	0	0	0	0	0	0	0	0	0	0	0	0	0	0	0	0	0	0	0	0	0	0	0	0	0	0	0	0	0	0
ASV206	TTTATCGGCCGGAATCGCCCATGGCGGAGCTTCTGTTGATTCAGCTATTTTTTCTCTCCATTTAGCCGGAATTTCTTCAATTTTAGGTGCCGTAAATTTTATTACAACAGTAATTAATATACGATCTACAGGAATTACTTTTGACCGAATACCTTTATTTGTTTGATCCGTTGTAATTACAGATATTTTACTTTTATTATCTTTA	Root	Metazoa	Arthropoda	Insecta	Diptera	Diptera sp.	Diptera sp.	Diptera sp. 31	170	0	0	0	0	0	0	0	0	0	0	0	0	0	0	0	0	0	0	0	0	0	0	0	0	0	0	0	0	0	0	0	0	0	0	0	0	0	0	0
ASV207	ACTGTCATCAAATATTGCACTTGGTGGATCTTCTGTTGATTTAGCTATTTTTAGACTTCATTTAGCAGGAATCTCTTCAATTTTAGGAGCAGTAAATTTTATTTCTACTGTCATTAATATACGAACAGTAGGTATTTCATTTGACCGAATACCCCTTTTTGTTTGATCCGTAGCTATTACAGCTTTATTACTTTTACTATCATTA	Root	Metazoa	Arthropoda	Insecta	Diptera	Diptera sp.	Diptera sp.	Diptera sp. 32	151	0	0	0	0	0	0	0	0	0	0	0	0	0	0	0	0	0	0	0	0	0	0	0	0	0	0	0	0	0	0	0	0	0	0	0	0	0	0	0
ASV208	GTTATCATCTGTAATTGCTCACGGAGGAGCTTCAGTTGATTTACCAATTTTTTCTTTACATTTAGCTGGAATTTCAAGTATTTTAGGAGCAGTAAATTTTATTACTACAGTTATTTATGTACGAAGTACAGGAATTACTTTCGATCGAATACCCCTATTTGTTTGATCAGTAGTAATTACAGCTTTACTTTTATTACTTTCTTTA	Root	Metazoa	Arthropoda	Insecta	Diptera	Diptera sp.	Diptera sp.	Diptera sp. 33	151	0	0	0	0	0	0	0	0	0	18	0	0	0	0	0	0	0	0	0	0	0	0	0	0	0	0	0	0	0	0	0	0	0	0	0	0	0	0	0
ASV209	ACTATCATCTAATATTCCACATGGAGGAGCTTCTGTTGATTTAGCTATTTTTTCCCTTCATTTAGCAGGAATTTCATCTATTTTAGGAACTGTTAGTTTTATTACAACTGCTATTAATATACGATCAACAGGTATTACTTTTGATCGAATTCCATTATTTGTTTGATCAGTAGTAAGTACAGCTCTATTACTTTTATTATCTTTA	Root	Metazoa	Arthropoda	Insecta	Diptera	Diptera sp.	Diptera sp.	Diptera sp. 34	149	0	0	0	0	0	0	0	0	0	0	0	0	0	0	0	0	0	0	0	0	0	0	0	0	0	0	0	0	0	0	0	0	0	0	0	0	0	0	0
ASV210	CTTATCTTCTAATTTAGGTCAAATAGGTTCCTCAATAGACTTTGCTATTTTTGCCTTACATATTGCAGGAATATCTTCAATTATAGGAGCAATTAATTTTATTTCTACTATTTTAAATATATTTAATTATAACTTAAAAATTTATAATTTAACCTTATTTTCATGATCAGTTTTAATTACAGCTATTTTATTACTTCTTTCTTTA	Root	Metazoa	Arthropoda	Insecta	Diptera	Diptera sp.	Diptera sp.	Diptera sp. 35	144	0	0	0	0	0	0	0	0	0	0	0	0	0	0	0	0	0	0	0	0	0	0	0	0	0	0	0	0	0	0	0	0	0	0	0	0	0	0	0
ASV211	TTTATCAACAACAATTTCTCATGTAGGAAGATCAGTAGATTTAACTATTTTTTCTTTACATTTAGCCGGTATTTCATCTATTTTAGGAGCTGTAAATTTTATTACTACTATTATTAATATACGATCACCAGGTATAAATATAGATATAATACTTTTATTTGTTTGATCTGTATTTATTACTACTATTTTATTATTGCTTTCATTA	Root	Metazoa	Arthropoda	Insecta	Diptera	Diptera sp.	Diptera sp.	Diptera sp. 36	141	0	0	0	0	0	0	0	74	67	0	0	0	0	0	0	0	0	0	0	0	0	0	0	0	0	0	0	0	0	0	0	0	0	0	0	0	0	0	0
ASV212	TCTTTCATCAAGTATTGCTCATAGAGGGGCCTCTGTTGATTTAGCTATTTTTTCTTTACATTTAGCAGGTATTTCATCTATTTTAGGATCAGTAAATTTTATTACTACAGCTATTAACATACGAGCTAACGGTATTACTCTTGATCGAATACCTCTTTTTGTTTGATCTGTAGTAATTACAACAATTTTACTACTTTTATCTCTT	Root	Metazoa	Arthropoda	Insecta	Diptera	Diptera sp.	Diptera sp.	Diptera sp. 37	114	0	0	0	0	0	0	0	0	0	0	0	0	0	0	0	0	0	0	0	0	0	0	0	0	0	0	0	0	0	0	0	0	0	0	0	0	0	0	0
ASV213	ATTAGCTAGTAATATCGCTCATAGTGGAGCCTCTGTTGATTTAGCAATTTTCTCCCTTCATCTAGCTGGAATCTCTTCTATTTTAGGAGCAGTAAATTTTATTACAACAATTATTAACATACGATCAAAAGGAATTACATTCGACCGTATACCGTTATTTGTATGATCAGTATTAATTACTGCTATCTTATTACTTCTCTCACTA	Root	Metazoa	Arthropoda	Insecta	Diptera	Diptera sp.	Diptera sp.	Diptera sp. 38	99	0	0	0	0	0	0	0	0	0	0	0	0	0	0	0	0	0	0	0	0	0	0	0	0	0	0	0	51	0	0	0	0	0	0	0	0	0	0	0
ASV214	GCTATCTTCTGGGATTGCTCATAGAGGAGCTTCAGTTGATTTAGCTATTTTTTCATTACATTTAGCAAGAATTTCTTCAATTTTAGAAGCAGTAAATTTTATTACAACAGTAATTAATATAAGTTCTACAGGAATTACTTTTGATCGAATACCTTTATTTGTATGATCTGTAGTAATTACAGCTCTTTTATTGCTTTTATCATTA	Root	Metazoa	Arthropoda	Insecta	Diptera	Diptera sp.	Diptera sp.	Diptera sp. 39	62	0	0	0	0	0	0	0	0	0	0	2	0	0	0	0	0	0	0	0	0	30	30	0	0	0	0	0	0	0	0	0	0	0	0	0	0	0	0	0
ASV215	TCTATCGTCAACTTTATCTCATTCGGGGGCTTCTGTAGATTTATCTATTTTTTCTTTACATCTAGCGGGGATTTCTTCTATTCTAGGGGCAGTAAATTTTATTTCAACAATTATTAATATACGAGCTCCAGGTATATCTTTTGATAAAATACCCTTATTTGTTTGATCTGTATTAATTACAGCAATTTTACTTCTTTTATCTTTA	Root	Metazoa	Arthropoda	Insecta	Diptera	Diptera sp.	Diptera sp.	Diptera sp. 4	12429	0	0	0	0	0	0	0	0	0	0	0	0	0	0	0	0	0	0	0	0	0	0	0	0	0	0	0	0	0	0	0	0	0	0	0	0	0	0	0
ASV216	TCTTTCAAGTAATATTGCTCATAGTGGGGCTTCTGTTGATTTAGCTATTTTTTCACTTCATTTAGCAGGAATTTCATCTATTTTAGGAGCTGTAAATTTTATTACTACAGTAATTAATATACGATCAACAGGAATCACTTTAGATCGTATACCATTATTTGCTTGATCAGTTGTAATTACAGCTGTTTTACTACTTCTCTCTTTA	Root	Metazoa	Arthropoda	Insecta	Diptera	Diptera sp.	Diptera sp.	Diptera sp. 40	2359	7	0	0	0	0	0	0	0	0	0	0	0	0	0	0	0	0	0	0	0	0	0	0	0	0	0	0	0	0	0	0	0	0	0	0	0	0	0	0
ASV217	GCTATCTTCTGGGATTGCTCATGGAGGAGCTTCAGTTGATTTAGCTATTTTTTCATTACATTTAGCAGGAATTTCTTCAATTTTAGGAGCAGTTAGTTTTATTCCAACAGTAATTAATATACGTTCTACAGGAATTACTTTTGATCGACTACCTTTATTTGTATGATCTGTAGTAATTACATCTCTTTTATTGCTTTTATCTTTA	Root	Metazoa	Arthropoda	Insecta	Diptera	Diptera sp.	Diptera sp.	Diptera sp. 41	52	0	0	0	0	0	0	0	0	0	0	0	0	0	0	0	0	0	0	0	0	32	20	0	0	0	0	0	0	0	0	0	0	0	0	0	0	0	0	0
ASV218	GTTATCTTATGGGATTGCTCATGGAGCTTCAGTTGATTTAGCTATCTTTTCATTACATTTAGTGGGAATTTCTTCAATTTTAGGGGCAATAAATTTTATTACAACAGTAATTAATATACGTTCTACAGAAATTTCTTTTGATCGAATACCTTTATTTGTATGATCTGTAGTAATTACAGCTCTTTTATTGCTTTTATCTTCA	Root	Metazoa	Arthropoda	Insecta	Diptera	Diptera sp.	Diptera sp.	Diptera sp. 42	50	0	0	0	0	0	0	0	0	0	0	0	0	0	0	0	0	0	0	0	0	22	28	0	0	0	0	0	0	0	0	0	0	0	0	0	0	0	0	0
ASV219	GCTATCTTCTGGGATTGCTCATGGAGCAGCTTTAGATGATTTAGCTATTTTTTCATTACATTTAGCAGGAATTTCTTCAATTTTAGGAGCAGTCAATTTTATTACAACAGTAATTAATATACGTTCTACAGGAATAACTTTTGATCGAATACCTTTATTTGTATGATCTGTAGTAATTACAGCTCTTTTATTACTTTTATCTTTA	Root	Metazoa	Arthropoda	Insecta	Diptera	Diptera sp.	Diptera sp.	Diptera sp. 43	45	0	0	0	0	0	0	0	0	0	0	0	0	0	0	0	0	0	0	0	0	29	16	0	0	0	0	0	0	0	0	0	0	0	0	0	0	0	0	0
ASV220	GCTATCTTCTGGGATTGCTCACGAAAGAGCTTCAGTTGATTTAGCTATTTTTCATTACATTTAGCAGGAATTTCTTCAATTTTAGGAGCAATAAATTTTATTACAACAGTAATTAATATACGTTCTACAGGAATTACTTTTGATCGAGTACCTTTATTTGTATGATCTGTAGTAATTGCAGCTCTTTTATTGCTTTTATCTTTA	Root	Metazoa	Arthropoda	Insecta	Diptera	Diptera sp.	Diptera sp.	Diptera sp. 44	45	0	0	0	0	0	0	0	0	0	0	0	0	0	0	0	0	0	0	0	0	22	23	0	0	0	0	0	0	0	0	0	0	0	0	0	0	0	0	0
ASV221	GTTATCATCTGTAATTGCTCATGGAGGAGCTTCAGTTGATTTAGCAATTTTGCCTCTACATTTAGCTGGAATTTCAAGTATTTTAGGAGCAGTAAATTTTATTAGTACAGTTATTAATATACGAAAAACAGGAATTACTTTTGATCGAATACCCCTTTTTGTTTGATCAGTAGTAATTACAGCTTTATTTTTATTACTTTCTTTA	Root	Metazoa	Arthropoda	Insecta	Diptera	Diptera sp.	Diptera sp.	Diptera sp. 45	44	0	0	0	0	0	0	0	0	0	0	0	0	0	0	0	0	0	0	0	0	0	0	0	0	0	0	0	0	0	0	0	0	0	0	0	0	0	0	0
ASV222	GTTATCATCTGTAATTGCTCATGGAGGAGCTTCAGTTGATTTAGCAATTTTTTCTTTACATTTAGCTGGAATTTCAAGTATATTAGGAGCAGTAAATTTTATTACTACAGTTTTTAATATACGAAGTACAGGAATTACTTTCGATCGAATACCTTTATTTGTTTGATCAGTAGTAATTACAGCTTTACTTCTACTACTTTCTTTA	Root	Metazoa	Arthropoda	Insecta	Diptera	Diptera sp.	Diptera sp.	Diptera sp. 46	41	0	0	0	0	0	0	0	0	0	0	0	0	0	0	0	0	0	0	0	0	0	0	0	0	0	0	0	0	0	0	0	0	0	0	0	0	0	0	0
ASV223	GCTATCTTCTGGGATTGCTCATGGAGGAGCTTTAGTTGATTTAGCTATTTTTTCATTACATTTAGCAGGAAATTCTTCAATTTTAGAAGCAGTAAATTTTATTACAACAGTAATTAATATACGTTCTACAGGAATTACTTTTGATCGAATACCTTTATTTTTATGAGCTGTAGTAATTACAGCTCTTGTATTGCTTTTATCTTTA	Root	Metazoa	Arthropoda	Insecta	Diptera	Diptera sp.	Diptera sp.	Diptera sp. 47	39	0	0	0	0	0	0	0	0	0	0	0	0	0	0	0	0	0	0	0	0	18	21	0	0	0	0	0	0	0	0	0	0	0	0	0	0	0	0	0
ASV224	GCTATCTTCTGGGATTGCTCATGGAGGAGCTTCAGTTGATTTAGCTATTTTTTCATTACATTTAGCTGGAAATTCTTCAATTTTAGAAGCAGTAAATTTTATTACAACAGTAATTAATATACGTTCTACAGGAATTACTTTTGATCGAATATCTTTATTTGTATGGTCTGTAGTAATTACAGCTTTTATTGCTTTTATCTTTA	Root	Metazoa	Arthropoda	Insecta	Diptera	Diptera sp.	Diptera sp.	Diptera sp. 48	38	0	0	0	0	0	0	0	0	0	0	0	0	0	0	0	0	0	0	0	0	21	17	0	0	0	0	0	0	0	0	0	0	0	0	0	0	0	0	0
ASV225	TCTATCTGCTGGAATTGCACATGGAGGAGCCTCAGTAGACTTAGCCATCTTTTCCCTCCACTTGGCAGGAGTATCATCTATTTTAGGAGCTGTAAATTTTATTACTACCGTAATTAATATACGATCTGCAGGAATTTCATTTGATCGAATACCATTATTTGTATGATCAGTAGCAATTACAGCTCTATTACTTCTACTATCACTT	Root	Metazoa	Arthropoda	Insecta	Diptera	Diptera sp.	Diptera sp.	Diptera sp. 5	11476	0	0	0	0	0	0	0	0	0	0	0	0	0	0	0	0	0	0	0	0	0	0	0	0	0	0	0	0	0	0	0	0	0	0	0	0	0	0	0
ASV226	ATTATCTTCTACTATTTCACACTCTGGGGCATCTGTGGATTTATCAATTTTTTCTTTACATCTAGCTGGAATTTCATCTATTTTAGGTGCCGTAAACTTTATTTCAACAATTATTAATATACGAGCCCCTGGTATATCTTTTGATAAAATACCATTATTTGTGTGATCTGTTTTAATTACAGCAATTCTTTTATTATTATCATTA	Root	Metazoa	Arthropoda	Insecta	Diptera	Diptera sp.	Diptera sp.	Diptera sp. 6	10107	0	0	0	0	0	0	0	0	0	0	0	0	0	0	0	0	0	0	0	0	0	0	0	0	0	0	0	0	0	0	0	0	0	0	0	0	0	0	0
ASV227	TCTATCTGCAGGAATTGCACATGGTGGAGCATCAGTAGATTTAGCTATTTTCTCCTTACACTTAGCCGGAGTTTCATCTATTCTAGGAGCTGTAAACTTCATCACTACAGTAATTAATATACGATCTTCAGGAATTTCATTTGACCGAATACCATTATTTGTATGATCAGTAGCAATTACAGCCCTATTACTACTACTTTCATTA	Root	Metazoa	Arthropoda	Insecta	Diptera	Diptera sp.	Diptera sp.	Diptera sp. 7	6265	0	0	0	0	0	0	0	0	0	6265	0	0	0	0	0	0	0	0	0	0	0	0	0	0	0	0	0	0	0	0	0	0	0	0	0	0	0	0	0
ASV228	GCTATCTTCAACTATTGCCCATAATGGAGCTTCAGTTGATTTAGCAATTTTCTCATTACACTTAGCTGGAATTTCTTCAATTTTAGGTGCTGTAAATTTTATTACAACAGTAATTAATATACGTGCAACAGGAATTACTTTTGATCGAATACCTTTATTTGTATGATCTGTAGTTATTACAGCATTATTATTATTATTATCATTA	Root	Metazoa	Arthropoda	Insecta	Diptera	Diptera sp.	Diptera sp.	Diptera sp. 8	6102	0	0	0	0	0	0	0	0	0	1	0	0	0	0	0	0	0	0	0	0	2951	2994	0	0	0	0	0	56	0	0	0	0	0	0	0	0	0	18	0
ASV229	ACTTTCTTCTAGAATTGCTCATAGAGGGGCTTCTGTAGATTTAGCAATTTTTTCTCTTCATTTAGCAGGAATTTCTTCTATTCTTGGAGCTGTAAATTTTATTACTACAATCATTAATATACGATCTTCAGGAATTACATTTGACCGAATACCTTTATTTGTTTGATCAGTGGGAATTACGGCCGTATTACTTCTTCTTTCACTG	Root	Metazoa	Arthropoda	Insecta	Diptera	Diptera sp.	Diptera sp.	Diptera sp. 9	7338	0	0	0	0	0	870	745	0	0	0	0	0	0	0	108	125	0	0	0	0	0	0	0	0	0	0	0	0	0	0	0	0	0	0	0	0	0	0	0
ASV230	TTTATCAAGATTAATTTCTCATGGAGGCCCTTCTGTTGATTTGGCTATTTTTTCTCTTCATTTAGCCGGTATTTCTTCAATTTTAGGAGCTGTAAATTTTATTACAACTATTATTAATATACGATCAGTTGGAATTACATTTGAACGAATACCTTTATTTGTTTGATCTGTATTAATTACAGCAGTTCTTCTTCTTCTTTCATTG	Root	Metazoa	Arthropoda	Insecta	Diptera	Diptera sp.	Diptera sp.	Diptera sp. JN298822.1	507542	1	0	8	0	0	2	1	0	0	2518	18	8	306	598	14697	14795	4453	8577	2232	2504	15345	15993	0	0	858	924	505	13468	7	8	18	10	0	3538	2840	923	1365	1131	0
ASV231	ACTTTCTTCTATCATTGCTCATGGAGGAGCTTCAGTAGATTTAGCTATTTTTTCTTTACATTTAGCTGGAGTTTCATCAATTTTAGGAGCTGTAAATTTTATTACTACAGTTATTAATATACGATCTACAGGAATTACATTTGATCGAATACCATTATTTGTTTGATCAGTTGTAATTACTGCTTTATTATTATTATTATCATTA	Root	Metazoa	Arthropoda	Insecta	Diptera	Diptera sp.	Diptera sp.	Diptera sp. JN298894.1	13626	0	0	0	0	0	0	0	0	0	0	0	2	0	0	0	0	0	0	0	0	6317	5973	0	0	0	0	0	0	0	0	0	0	0	0	0	0	0	0	0
ASV232	TTTATCTTCAGTAATTGCTCATACTGGCTCATCAGTTGATTTTTCAATTTTTTCTCTTCATATTGCTGGAATTTCCTCAATTTTAGGAGCAATTAATTTTATTTCAACAATAATAAATATAAAAATTAAATTTTTAAAATTCAATCAAATTTCACTATTTACTTGATCAATTTTAATTACTACAATTTTATTACTTCTTTCTTTA	Root	Metazoa	Arthropoda	Insecta	Diptera	Diptera sp.	Diptera sp.	Diptera sp. JN298898.1	634	0	0	0	0	0	0	0	0	0	0	0	0	0	0	0	0	0	0	0	0	0	0	0	0	0	0	0	0	0	0	0	0	0	0	0	0	0	0	0
ASV233	GCTATCTTCTGGAATTGCTCATGGAGGAGCTTCAGTTGATTTAGCTATTTTTTCCTTACATTTAGCAGGAATTTCTTCAATTTTAGGGGCAGTAAATTTTATTACAACAGTAATTAATATACGTTCTACAGGAATTACTTTTGATCGAATACCTTTATTCGTATGATCTGTAGTAATTACAGCTCTTTTATTGCTTTTATCTTTA	Root	Metazoa	Arthropoda	Insecta	Diptera	Diptera sp.	Diptera sp.	Diptera sp. JN298902.1	9178	0	0	6	0	0	0	0	807	686	1424	0	0	202	353	0	0	0	0	0	0	1873	1405	0	1	45	31	0	0	0	0	0	0	0	429	350	0	0	134	0
ASV234	TTTATCAAGTTTAATTTCACATGGAGGACCATCAGTTGATTTGGCGATTTTTTCCCTTCATTTAGCCGGTATTTCATCAATTTTAGGGGCTGTAAATTTTATTACAACAATTATTAATATACGATCAGTTGGAATTACATTTGAACGAATGCCTTTATTTGTTTGATCAGTTCTAATTACTGCTGTTCTTCTTCTTCTTTCATTA	Root	Metazoa	Arthropoda	Insecta	Diptera	Diptera sp.	Diptera sp.	Diptera sp. JN298915.1	171	0	0	0	0	0	0	0	0	0	0	0	0	0	0	0	0	0	0	0	0	0	0	0	0	0	0	0	0	0	0	0	0	0	0	0	0	0	0	0
ASV235	ACTGTCATCAGGGATTGCACATGGAGGAGCATCTGTAGACTTAGCTATTTTTTCTTTACATTTAGCAGGAATCTCATCAATTTTAGGAGCTGTAAATTTTATTACAACAGTTATTAATATACGATCAACAGGTATCACATTTGACCGAATACCTTTATTTGTTTGATCTGTTGTAATTACAGCTTTATTATTATTATTATCTCTG	Root	Metazoa	Arthropoda	Insecta	Diptera	Diptera sp.	Diptera sp.	Diptera sp. JN298917.1	21120	0	0	0	0	0	0	0	0	0	0	0	0	0	0	0	0	0	0	0	0	0	0	0	0	0	0	0	0	0	0	0	0	0	0	0	0	0	0	0
ASV236	TCTATCTTCAATTATTGCACATACTGGATCTTCGGTTGATTTTTCAATTTTTTCTCTTCATATTGCAGGAATCTCATCAATTTTAGGGGCTATTAATTTTATTTCAACAATACTTAATATAAAAATTAAATTTTTAAATTTTGATCAAATTTCTTTATTTACATGATCAGTATTAATTACAGCAGTACTTTTATTACTTTCTTTA	Root	Metazoa	Arthropoda	Insecta	Diptera	Diptera sp.	Diptera sp.	Diptera sp. JN298922.1	74706	0	0	0	0	0	0	0	0	0	0	2	0	0	0	0	0	0	0	0	0	0	0	0	0	0	0	0	0	0	6	0	0	0	0	0	210	1489	20	0
ASV237	ACTATCATCAATTATTGCTCATGGAGGTGCTTCAGTTGATTTAGCTATTTTTTCACTTCACTTAGCTGGAGTATCATCAATTTTAGGAGCAGTAAATTTTATTACAACAGTAATTAATATACGATCAACAGGAATTACATTTGACCGAATACCCCTATTCGTTTGATCAGTAGTAATTACTGCTTTACTTTTATTATTATCTTTA	Root	Metazoa	Arthropoda	Insecta	Diptera	Diptera sp.	Diptera sp.	Diptera sp. JN298945.1	231	0	0	0	0	0	0	0	0	0	0	0	0	0	0	0	0	0	0	0	0	0	0	0	0	0	0	0	0	0	0	0	0	0	0	0	0	0	0	0
ASV238	TTTAGCTGCTAATGTTTCTCATGCAGGAGCTTCTGTTGACCTAGCTATTTTTTCTTTACATCTAGCAGGTATCTCCTCAATTTTAGGGGCAGTAAATTTTATTACAACTATTATTAATATGCGATCTACTGGAATTACATTTGATCGAATGCCTTTATTTGTTTGATCGGTATTAATTACGGCTATTCTTTTACTTTTATCGTTA	Root	Metazoa	Arthropoda	Insecta	Diptera	Diptera sp.	Diptera sp.	Diptera sp. JN298950.1	1455	0	0	0	0	0	0	0	0	0	0	0	0	0	0	0	0	0	0	0	0	0	0	0	0	0	0	0	0	0	0	0	0	0	0	0	0	0	0	0
ASV239	CCTCTCTTCTAGTATTGCTCATAGTGGAGCCTCAGTTGATTTAGCAATTTTTTCTCTTCATTTAGCAGGAATTTCTTCTATTTTAGGAGCTGTAAATTTTATTACAACAATTATTAATATACGATCATCAGGAATTACTTTCGACCGAATACCTTTATTTGTTTGATCAGTAGGAATTACAGCTTTATTACTTCTTTTATCATTA	Root	Metazoa	Arthropoda	Insecta	Diptera	Diptera sp.	Diptera sp.	Diptera sp. JN298964.1	4931	0	0	0	0	0	555	418	571	517	0	0	0	40	76	17	19	0	0	0	0	92	106	0	0	0	0	0	0	0	0	0	0	0	0	0	0	0	0	0
ASV240	GCTATCATCTAATATTGCTCATGGAGGAGCTTCTGTAGATTTAGCTATTTTTTCATTACACCTAGCAGGAATTTCTTCAATTCTAGGAGCTGTAAATTTTATTACTACTGTAATTAACATACGATCTACAGGAATTACTTTTGATCGAATGCCATTATTTGTTTGATCAGTAGTAATTACAGCTTTATTATTATTATTATCTTTA	Root	Metazoa	Arthropoda	Insecta	Diptera	Diptera sp.	Diptera sp.	Diptera sp. JN298979.1	996	0	0	0	0	0	0	0	0	0	0	0	0	0	0	0	0	0	0	0	0	0	0	0	0	0	0	0	0	0	0	0	0	0	0	0	0	0	0	0
ASV241	TTTATCTTCTAATATTGCTCATAGAGGAGCTTCTGTAGATTTAGCAATTTTTTCTTTACATTTAGCTGGAATTTCATCTATTTTAGGAGCAGTAAATTTTATTACAACTATTATTAATATACGATCAAAAGGAATTTCATTTGATCGAATACCTTTATTTGTGTGATCAGTAGCAATTACTGCTTTACTATTACTTTTATCATTA	Root	Metazoa	Arthropoda	Insecta	Diptera	Diptera sp.	Diptera sp.	Diptera sp. JN298983.1	79642	0	0	0	0	0	0	0	0	0	0	0	0	0	0	243	257	0	0	0	0	0	0	0	0	0	0	0	0	0	0	0	0	0	0	0	0	0	0	0
ASV242	ACTTTCATCTAATATTGCTCACGGAGGAGCTTCTGTAGATTTAGCTATTTTTTCATTACATTTAGCAGGAATTTCTTCAATTTTAGGAGCTGTAAATTTTATTACTACTGTAATTAATATACGATCTACAGGAATTACTTTTGATCGAATACCATTATTTGTTTGATCAGTAGTAATTACAGCCTTATTATTATTATTATCGCTA	Root	Metazoa	Arthropoda	Insecta	Diptera	Diptera sp.	Diptera sp.	Diptera sp. JN298984.1	41333	0	0	0	0	0	0	0	0	0	0	0	0	0	0	540	562	0	0	0	0	0	0	0	0	0	0	0	0	0	0	0	0	0	0	0	0	0	0	0
ASV243	CCTATCTTCAGTAATTGCACATGGTGGTGCATCTGTTGATTTAGCTATTTTTAGTTTACATTTAGCTGGAATTTCTTCTATTTTAGGAGCAGTAAATTTTATTACTACTGTTATTAATATACGATCTACAGGAATTTCATTTGATCGAATACCATTATTTGTTTGAGCTGTAGTTTTAACAGCACTATTATTATTATTATCCCTT	Root	Metazoa	Arthropoda	Insecta	Diptera	Diptera sp.	Diptera sp.	Diptera sp. KX052717.1	2042	0	0	0	0	0	0	0	0	0	0	0	0	0	0	0	0	0	0	0	0	0	0	0	0	0	0	0	0	0	0	0	0	437	0	0	0	0	0	0
ASV244	TTTATCCGCAGGAATTGCTCATGCGGGAGCATCAGTTGATTTAGCAATTTTTTCTCTACATTTAGCTGGGGTTTCATCAAGTTTAGGAGCAGTAAATTTTATTACAACAGTAATTAATATACGATCAACTGGAATTACTTTTGACCGTATACCTTTATTCGTGTGAGCGGTTGTAATTACAGCAGTTTTATTACTTTTATCTTTA	Root	Metazoa	Arthropoda	Insecta	Diptera	Diptera sp.	Diptera sp.	Diptera sp. nr JN290013.1	50	0	0	0	0	0	0	0	0	0	25	0	0	0	0	0	0	0	0	0	0	0	0	0	0	0	0	0	0	0	0	0	0	0	0	0	0	0	0	0
ASV245	TTTAGCTGCTAATGTTTCTCATGCAGGAGCTTCTGTAGACCTAGCTATTTTTTCTTTACATCTAGCAGGTATCTCCTCAATTTTAGGAGCAGTAAATTTTATTACAACTATTATTAATATGCGATCTACTGGAATTACATTTGATCGAATACCTTTATTTGTTTGGTCAGTATTAATTACAGCTATTCTTTTACTTTTATCATTA	Root	Metazoa	Arthropoda	Insecta	Diptera	Diptera sp.	Diptera sp.	Diptera sp. nr JN298833.1	190	0	0	0	0	0	0	0	0	0	0	0	0	0	0	0	0	0	0	0	0	0	0	0	0	95	95	0	0	0	0	0	0	0	0	0	0	0	0	0
ASV246	TTTATCAAGATTAATTTCTCATGGAGGCCCTTCTGTTGATTTAGCTATTTTTTCTCTTCATTTAGCTGGTATTTCTTCAATTTTAGGAGCTGTAAATTTTATTACAACTATTATTAATATACGATCAGTTGGAATTACATTTGAACGAATGCCTTTATTCGTTTGATCTGTATTAATTACGGCAGTTCTTCTGCTTCTTTCATTA	Root	Metazoa	Arthropoda	Insecta	Diptera	Diptera sp.	Diptera sp.	Diptera sp. nr JN298841.1	284	0	0	0	0	0	0	0	0	0	0	0	0	0	0	0	0	0	0	0	0	0	0	0	0	0	0	0	0	0	0	0	0	0	0	0	0	0	0	0
ASV247	ACTTTCTTCTATCATTGCTCACGGAGGAGCTTCAGTAGATTTAGCTATTTTTTCTTTACATTTAGCTGGAGTTTCATCAATTTTAGGAGCTGTAAATTTTATTACTACAGTTATTAATATACGATCTACAGGAATTACATTTGATCGAATGCCATTATTTGTTTGATCAGTTGTAATTACTGCTTTATTATTGTTACTATCATTA	Root	Metazoa	Arthropoda	Insecta	Diptera	Diptera sp.	Diptera sp.	Diptera sp. nr JN298894.1	400	0	0	0	0	0	0	0	0	0	0	0	0	0	0	0	0	0	0	0	0	213	155	0	0	0	0	0	0	0	0	0	0	0	0	0	0	0	0	0
ASV248	ACTATCTTCTGGAATTGCTCATGGAGGAGCTTCAGTTGATTTATCTATTTTTTCATTACACTTAGCAGGAATTTCTTCAATTTTAGGAGCAGTAAATTTTATTACAACAGTAATTAATATGCGTTCTACAGGAATTACTTTTGATCGAATACCTTTATTTGTATGATCTGTAGTAATTACAGCTCTTTTATTGCTTTTATCTTTA	Root	Metazoa	Arthropoda	Insecta	Diptera	Diptera sp.	Diptera sp.	Diptera sp. nr JN298935.1	132	0	0	0	0	0	0	0	11	15	0	0	0	0	0	0	0	0	0	0	0	60	46	0	0	0	0	0	0	0	0	0	0	0	0	0	0	0	0	0
ASV249	ACTATCTTCTGGAATTGCTCATGGAGGAGCTTCAGTTGATTTAGCTATTTTTTCATTACATTTGGCAGGAATTTCTTCAATTTTAGGGGCAGTAAATTTTATTACAACAGTAATTAATATGCGTTCTACAGGAATTACTTTTGATCGAATACCTTTATTTGTATGATCTGTAGTAATTACAGCTCTTTTATTGCTTTTATCTTTA	Root	Metazoa	Arthropoda	Insecta	Diptera	Diptera sp.	Diptera sp.	Diptera sp. nr JN298935.1	121	0	0	0	0	0	0	0	0	0	0	0	0	0	0	0	0	0	0	0	0	75	46	0	0	0	0	0	0	0	0	0	0	0	0	0	0	0	0	0
ASV250	ACTATCATCTTATATTGCTCACGAAGGAGCTTCTGTAGATTTAGCTATTTTTTCATTACATTTAGCAGGAATTTCTTCAATTCTAGGAGCTGTAAATTTTATTACTTCTGTAATTAATATACGATCTACAGGAATTACTTTTGATCGAATACCATTATTTGTTTGATCAGTAGTAATTACAGCTTTATTATTATTATTATCTTTA	Root	Metazoa	Arthropoda	Insecta	Diptera	Diptera sp.	Diptera sp.	Diptera sp. nr JN298984.1	291	0	0	0	0	0	0	0	0	0	0	0	0	0	0	0	0	0	0	0	0	0	0	0	0	0	0	0	0	0	0	0	0	0	0	0	0	0	0	0
ASV251	TCTTTCTTCTAATATTGCCCATGCTGGAGCTTCTGTTGATTTAGCTATCTTTTCTTTACATTTAGCTGGTATTTCTTCAATTTTAGGAGCAGTAAATTTTATTACAACAGTAATTAATATACGATCAGAAGGAATTTCTTTAGATCGAATACCACTATTTGTATGATCAGTAATTATTACTGCTGTTCTATTACTTTTATCTTTA	Root	Metazoa	Arthropoda	Insecta	Diptera	Diptera sp.	Diptera sp.	Diptera sp. nr KP697423.1	244	0	0	0	0	0	0	0	0	0	0	0	0	0	0	0	0	0	0	0	0	0	0	0	0	0	0	0	0	0	0	0	0	0	0	0	0	0	0	0
ASV252	TCTTTCTTCGAATATTGCCCATGCTGGAGCTTCTGTTGATTTAGCTATTTTTTCTTTACACTTAGCCGGTATTTCTTCAATCTTAGGGGCAGTAAATTTTATTACAACAGTAATTAATATGCGATCAGAAGGAATTTCTTTAGATCGAATACCGCTATTTGTGTGATCGGTGATTATTACTGCTATTTTATTACTTTTATCTTTA	Root	Metazoa	Arthropoda	Insecta	Diptera	Diptera sp.	Diptera sp.	Diptera sp. nr KP697519.1	2666	0	0	0	0	0	0	0	0	0	0	0	0	0	0	0	0	0	0	0	0	0	0	0	0	0	0	0	0	0	0	0	0	0	0	0	0	0	0	0
ASV253	ATTATCTGCAGGAATTGCTCATGGAGGAGCCTCAGTAGACTTAGCAATTTTTTCCCTTCATTTAGCCGGAGTATCATCTATTTTAGGAGCAGTAAATTTCATTACCACAGTAATTAATATACGATCTCCAGGAATTTCATTTGACCGAATACCACTATTTGTATGATCAGTAGTAATTACAGCACTATTATTATTACTTTCATTA	Root	Metazoa	Arthropoda	Insecta	Diptera	Dolichopodidae	Dolichopodidae sp.	Dolichopodidae sp. 1	149342	0	0	0	0	0	0	0	0	0	0	0	0	0	0	0	0	0	0	0	0	0	0	0	0	0	0	0	0	0	0	0	0	0	0	0	0	0	0	0
ASV254	TTTATCAGCTGGAATTGCTCACGGTGGAGCTTCTGTTGATTTAGCCATTTTTTCTTTACATTTAGCAGGGATTTCTTCAATTTTAGGGGCTGTAAATTTTATTACAACAGTAATTAATATACGATCTACAGGAATTACTTTTGACCGAATACCTTTATTTGTTTGATCAGTTGTAATTACAGCTATTTTACTTTTATTATCTTTA	Root	Metazoa	Arthropoda	Insecta	Diptera	Dolichopodidae	Dolichopodidae sp.	Dolichopodidae sp. 2	73914	0	0	0	0	0	0	0	0	0	0	0	0	0	0	0	0	0	0	0	0	0	0	0	0	0	0	0	0	0	0	0	0	0	0	0	0	0	0	0
ASV255	TCTTTCTTCAGGAATTGCACATGGTGGGGCATCAGTAGATTTTGCAATTTTTTCTTTACATTTAGCAGGTATTTCTTCTATTTTAGGAGCAGTAAATTTTATTACTACTGTTATTAATATACGATCAACAGGTATTACATTTGATCGTATACCTTTATTTGTATGATCAGTATTAATTACTGCTATTCTATTACTTTTATCCCTT	Root	Metazoa	Arthropoda	Insecta	Diptera	Dolichopodidae	Dolichopodidae sp.	Dolichopodidae sp. 3	50943	0	0	0	0	0	0	0	0	0	0	0	0	0	0	0	0	0	0	0	0	0	0	0	0	0	0	0	0	0	0	0	0	0	0	0	0	0	0	0
ASV256	CCTATCTTCAGGAATTGCTCATGGAGGAGCTTCTGTAGATTTAGCAATCTTCTCCCTTCATTTAGCAGGTATCTCTTCTATTTTAGGTGCTGTAAACTTTATTACTACAGTTATTAATATACGATCAACAGGGATTACTTTTGACCGAATACCTCTATTTGTGTGATCCGTTGTTATTACTGCAATTCTTCTACTTCTTTCCCTT	Root	Metazoa	Arthropoda	Insecta	Diptera	Dolichopodidae	Dolichopodidae sp.	Dolichopodidae sp. 4	36521	0	0	0	0	0	0	0	0	0	0	0	0	0	0	0	0	0	0	0	0	0	0	0	0	0	0	0	0	0	0	0	0	0	0	0	0	0	0	0
ASV257	TTTATCTGCAGGAATTGCTCATGGAGGAGCTTCAGTAGATCTAGCAATTTTTTCTCTCCATTTAGCAGGAATTTCATCAATTTTAGGAGCAGTAAATTTTATTACTACAGTTATTAATATACGATCAACAGGAATTTCATTTGATCGAATACCTTTATTTGTTTGATCAGTTGTAATTACAGCTATTTTATTATTACTATCTCTT	Root	Metazoa	Arthropoda	Insecta	Diptera	Dolichopodidae	Sympycnus	Sympycnus sp.	31120	0	0	0	0	0	0	0	0	0	0	0	0	0	0	0	0	0	0	0	0	0	0	0	0	0	0	0	0	0	0	0	0	0	0	0	0	0	0	0
ASV258	CTATCTTCTGGTATTGCACATGGTGGTGCTTCAGTTGATTTAGCTATTTTCTCTTTACACTTAGCCGGAATTTCTTCAATTTTAGGGGCAGTAAATTTTATCACAACAGTAATTAATATACGATCTACAGGAATTACATTAGACCGAATACCTTTATTTGTTTGATCAGTAGTAATTACTGCTTTATTGCTTCTCCTATCTTTA	Root	Metazoa	Arthropoda	Insecta	Diptera	Drosophilidae	Drosophila	Drosophila buzzatii/koepferae	46	0	0	0	0	0	0	0	0	0	0	0	0	0	0	0	0	0	0	0	0	0	0	0	0	0	0	0	0	0	0	0	0	0	0	0	0	0	0	0
ASV259	TTTATCGTCAGGAATTGCTCATAGAGGAGCATCAGTAGATCTAGCAATTTTTTCTTTACATCTTGCAGGTGTATCTTCAATTTTAGGAGCAGTAAATTTTATTACAACAGTAATTAATATACGATCGCCAGGAATTACATTAGATCGAATACCTTTATTTGTTTGATCAGTTGTCATTACTGCTCTTCTACTTCTTTTATCACTC	Root	Metazoa	Arthropoda	Insecta	Diptera	Drosophilidae	Drosophilidae sp.	Drosophilidae sp. 1	46367	0	0	0	0	0	0	0	0	0	0	0	0	0	0	0	0	0	0	0	0	0	0	0	0	0	0	0	0	0	0	0	0	0	0	0	0	0	0	0
ASV260	TTTATCCTCAGGAATTGCCCATAGAGGTGCTTCAGTCGATTTAGCTATTTTTTCTCTTCACCTTGCAGGTATTTCTTCAATTCTAGGAGCTGTTAATTTCATTACAACAGTAATTAATATACGATCTCCTGGAATTTCATTAGACCGAATACCTTTATTTGTTTGATCAGTTGTTATTACAGCTTTACTACTTCTTCTTTCTCTC	Root	Metazoa	Arthropoda	Insecta	Diptera	Drosophilidae	Drosophilidae sp.	Drosophilidae sp. 2	143926	0	0	2	0	0	0	1	0	0	0	0	0	653	1294	0	0	0	0	0	0	0	0	0	1	0	0	1863	10568	6	5	3	0	0	3938	2914	0	0	1239	0
ASV261	ACTTTCATCAGGGATTGCTCATGGAGGAGCTTCTGTTGATCTTGCTATTTTTTCTCTTCACCTTGCAGGAATTTCATCAATTCTTGGAGCAGTAAATTTTATTACAACTGTGATTAATATACGATCTACAGGAATTACATTTGATCGAATACCTTTATTTGTTTGATCAGTTGTTATTACTGCTTTATTACTACTTTTATCTTTA	Root	Metazoa	Arthropoda	Insecta	Diptera	Drosophilidae	Drosophilidae sp.	Drosophilidae sp. 3	2447	0	0	0	0	0	0	0	0	0	0	0	0	0	0	0	0	0	0	0	0	0	0	0	0	0	0	0	0	0	0	0	0	0	0	0	0	0	0	0
ASV262	ACTTTCATCAGGAATCGCACATGGAGGAGCTTCTGTAGACTTAGCAATTTTTTCATTATATCTAGCAGGAATTTCTTCAATTCTAGGAGCAGTAAATTTTATTACAACAGTTATTAATATACGATCAACTGGAATTACATTTGATCGAATGCCTTTATTTGTTTGATCAGTAGTAATTACTGCTTTATTATTGTTATTATCTTTA	Root	Metazoa	Arthropoda	Insecta	Diptera	Drosophilidae	Drosophilidae sp.	Drosophilidae sp. 4	59	0	0	0	0	0	0	0	0	0	0	0	0	0	0	0	0	0	0	0	0	20	12	0	0	0	0	0	0	0	0	0	0	0	0	0	0	0	0	0
ASV263	TTTATCATCAGGGATTGCCCATAGAGGAGCATCAGTAGACCTAGCAATTTTTTCTTTACATCTTGCAGGTGTATCTTCAATTTTAGGAGCAGTAAATTTTATTACAACAATAATTAATATACGATCACCTGGAATTACATTAGATCGAATACCTTTATTTGTTTGATCAGTTGTTATTACTGCTCTTCTACCTCTTTTATCCCTC	Root	Metazoa	Arthropoda	Insecta	Diptera	Drosophilidae	Drosophilidae sp.	Drosophilidae sp. 5	353	0	0	0	0	0	0	0	0	0	0	0	0	0	0	0	0	0	0	0	0	0	0	0	0	0	0	0	0	0	0	0	0	0	0	0	0	0	0	0
ASV264	TTTATCATCAGGAATTGCTCATGGAGGAGCTTCTGTTGATTTAGCAATTTTTTCTTTACATTTAGCAGGTATTTCTTCAATTTTAGGGGCTGTAAATTTTATTACTACTGTAATTAATATACGATCATCAGGAATTACTTTAGATCGAATACCTTTATTTGTATGATCAGTAGTAATTACAGCGTTGTTATTACTTTTATCTTTA	Root	Metazoa	Arthropoda	Insecta	Diptera	Drosophilidae	Scaptomyza	Scaptomyza australis	7146	0	0	0	0	0	0	0	0	0	0	0	0	0	0	0	0	0	0	0	0	0	0	0	0	0	0	0	0	0	0	0	0	0	0	0	0	0	0	216
ASV265	CTTTCATCTGGTATCGCCCATGGTGGTGCTTCTGTTGATTTAGCCATTTTTTCTTTACATTTAGCCGGTATTTCTTCTATTTTAGGAGCAGTAAATTTTATTACAACAGTAATTAATATACGAACTCCTGGAATCTCATTTGATCGAATACCTTTATTTGTATGATCAGTAGTAATTACTGCAATTTTATTATTACTTTCTTTA	Root	Metazoa	Arthropoda	Insecta	Diptera	Empididae	Empididae sp.	Empididae sp.	66053	0	0	41	13939	52048	0	7	3	0	0	0	0	0	0	0	0	0	0	0	0	0	0	0	15	0	0	0	0	0	0	0	0	0	0	0	0	0	0	0
ASV266	GCTATCTTCAACTATTGCTCATAATGGCGCTTCAGTTGATTTAGCAATTTTCTCATTACACTTAGCCGGAATTTCTTCAATTTTAGGTGCTGTAAATTTTATTACAACAGTAATTAATATACGTGCGACAGGAATTACTTTTGATCGAATACCTTTATTTGTATGATCTGTAGTTATTACAGCATTATTATTATTATTATCATTA	Root	Metazoa	Arthropoda	Insecta	Diptera	Ephydridae	Ephydridae sp.	Ephydridae sp.	89	0	0	0	0	0	0	0	0	0	0	0	0	0	0	0	0	0	0	0	0	0	0	0	0	39	50	0	0	0	0	0	0	0	0	0	0	0	0	0
ASV267	CCTTTCCTCAGTAATTGCCCATAGCGGAGCTTCTGTTGATTTAGCTATTTTTTCTCTTCACTTAGCAGGAATTTCTTCAATTCTAGGAGCTGTGAATTTTATTACTACAATTATTAATATGCGAGCAGTAGGAATTTCATATGATCGAATACCTCTTTTTGTTTGATCAGTTATAATTACAGCCTTCTTACTTTTATTATCTCTT	Root	Metazoa	Arthropoda	Insecta	Diptera	Fergusoninidae	Fergusonina	Fergusonina sp.	56	0	0	0	0	0	0	0	0	0	0	0	0	0	0	0	0	0	0	0	0	0	0	0	0	0	0	0	0	0	0	0	0	0	0	0	0	0	0	0
ASV268	CCTTTCCTCAGTAATTGCTCATAGAGGAGCTTCTGTTGACTTAGCTATTTTTTCTCTTCATTTAGCAGGAATTTCTTCCATTCTAGGAGCTGTAAATTTTATTACTACAATTATTAATATACGAGCAGTAGGAATTTCATATGATCGAATACCCCTTTTTGTTTGATCCGTTATAATTACAGCCTTTTTACTTTTATTATCTCTT	Root	Metazoa	Arthropoda	Insecta	Diptera	Fergusoninidae	Fergusonina	Fergusonina sp. KY378176.1	4236	0	0	0	0	0	0	0	0	0	0	0	0	0	0	0	0	0	0	0	0	0	0	0	0	0	0	0	0	0	0	0	0	0	0	0	0	0	0	0
ASV269	ACTATCCTCAGGTATTGCTCATGGTGGAGCTTCTGTAGACTTAGCTATTTTTAGACTTCATTTAGCCGGAGTTTCCTCAATTTTAGGAGCAGTAAATTTTATTACAACTGTAATTAATATACGTTCTACAGGAATTACATTTGACCGAATACCATTATTTGTCTGATCTGTTGTAATTACAGCTCTTTTACTTTTATTATCCCTT	Root	Metazoa	Arthropoda	Insecta	Diptera	Heleomyzidae	Heleomyzidae sp.	Heleomyzidae sp.	259635	0	98321	160389	0	0	0	3	0	1	0	1	0	0	0	0	0	0	0	0	0	0	0	3	4	0	0	0	0	0	0	0	0	0	0	0	0	0	0	0
ASV270	TTTATCTGCAGGAATTGCTCATGGAGGAGCTTCAGTAGATTTAGCAATTTTTTCTCTCCATTTAGCAGGAATTTCATCAATTTTAGGAGCAGTAAATTTTATTACTACAGTTATTAATATACGATCAACAGGAATTTCATTTGATCGAATACCTTTATTTGTTTGATCAGTTGTAATTACAGCTATTTTATTATTACTATCTCTT	Root	Metazoa	Arthropoda	Insecta	Diptera	Hybotidae	Hybotidae sp.	Hybotidae sp.	3877	0	0	0	0	0	0	0	0	0	0	0	0	0	0	0	0	0	0	0	0	0	0	0	0	0	0	0	0	0	0	0	0	0	0	0	0	0	0	0
ASV271	TCTATCAGCAGGAATTGCCCATGGAGGAGCTTCTGTAGACTTAGCAATTTTTTCTCTACATTTAGCTGGGATTTCATCAATTTTAGGAGCTGTAAATTTTATTACAACAGTAATTAATATACGATCTACAGGAATCACATTAGATCGAATACCTTTATTTGTTTGATCAGTAGTAATTACAGCTATTCTTCTTCTTTTATCATTA	Root	Metazoa	Arthropoda	Insecta	Diptera	Iteaphilidae	Iteaphila	Iteaphila sp.	50	0	0	0	0	0	0	0	0	0	0	0	0	0	0	0	0	0	0	0	0	0	0	0	0	0	0	0	0	0	0	0	0	0	0	0	0	0	0	0
ASV272	CTTATCAACAACAATTTCCCATGTAGGAAGATCAGTAGATTTAACTATTTTTTCTTTACATTTAGCCGGTATTTCCTCTATTTTAGGGGCTGTAAATTTTATTACCACTATTATTAATATACGATCCCCAGGTATAAATATAGATATAATACCTTTATTTGTTTGATCTGTATTTATTACTGCTATTTTATTATTACTTTCATTA	Root	Metazoa	Arthropoda	Insecta	Diptera	Keroplatidae	Keroplatidae sp.	Keroplatidae sp. 1	6222	0	0	2	0	0	0	0	2935	3284	0	0	0	0	0	0	0	0	0	0	0	0	0	1	0	0	0	0	0	0	0	0	0	0	0	0	0	0	0	0
ASV273	TTTATCAACAACAATTTCTCATGTAGGAAGATCAGTAGACCTAACTATTTTTTCTTTACATTTAGCCGGTATTTCATCTATTTTAGGGGCTGTACATTTTATTACTACTATTATTAATATACGATCACCAGGTATAAATATAGATATAATACTTCTATTTTGTTTGATCTGTATTTATTACTGCTATTTTATTATTACTTTCATTA	Root	Metazoa	Arthropoda	Insecta	Diptera	Keroplatidae	Keroplatidae sp.	Keroplatidae sp. 2	313	0	0	0	0	0	0	0	154	159	0	0	0	0	0	0	0	0	0	0	0	0	0	0	0	0	0	0	0	0	0	0	0	0	0	0	0	0	0	0
ASV274	TTTATCTACTACTATTTCTCATTCAGGAAGATCTGTTGATTTAGCAATCTTTTCCCTTCATTTAGCTGGTATTTCATCTATTTTAGGGGCCGTAAATTTTATTACAACTATTATTAATATACGATCGCCTGGAATAAATATAGATATAATGCCATTATTTGTTTGATCAGTATTTATTACAGCTATTTTATTATTATTATCATTA	Root	Metazoa	Arthropoda	Insecta	Diptera	Keroplatidae	Xenoplatyura	Xenoplatyura sp.	5547	0	0	0	0	0	0	0	0	0	0	0	0	0	0	0	0	0	0	0	0	0	0	0	0	0	0	0	0	0	0	0	0	0	0	0	0	0	0	0
ASV275	CTTATCTGCAGGAATTGCTCATGCGGGGGCATCAGTTGATTTAGCAATTTTTTCTCTACATTTAGCTGGGGTTTCATCAATTTTAGGGGCAGTAAATTTTATTACAACAGTAATTAATATACGATCAACTGGGATTACTTTTGATCGAATACCTTTATTCGTGTGAGCTGTTGTAATTACAGCAGTTTTATTACTTTTATCTTTA	Root	Metazoa	Arthropoda	Insecta	Diptera	Limoniidae	Symplecta	Symplecta pilipes	19368	0	0	0	0	0	0	0	0	0	1871	0	1	0	0	0	0	0	0	0	0	0	0	0	0	0	0	0	0	0	0	0	0	0	0	0	0	0	0	0
ASV276	ATTATCTTCAATTATCGCTCATGGAGGAGCTTCTGTTGATTTAGCAATTTTTTCACTTCATTTAGCAGGAGTATCGTCTATTTTAGGAGCTGTAAATTTTTTTACAACTGTAATTAATATACGAGCTACTGGAATTACTTTTGATCGAATACCATTATTTGTCTGATCAGTTGTAATTACTGCCTTATTATTATTATTATCATTA	Root	Metazoa	Arthropoda	Insecta	Diptera	Lonchaeidae	Silba	Silba sp.	48	0	0	0	0	0	0	0	22	8	0	0	0	0	0	0	0	0	0	0	0	0	0	0	0	0	3	0	0	0	0	0	0	0	0	0	0	0	0	0
ASV277	TTTATCCTCTGGAATTGCTCATGCTGGAGCATCTGTTGATTTAGCAATTTTTTCATTACATTTAGCTGGAATTTCTTCTATTTTAGGAGCTGTTAATTTTATTACAACTGTTATTAATATACGTTCATCAGGAATAAGTTTTGATCGAATACCTTTATTTGTTTGATCTGTAGTAATTACTGCTTTATTATTATTATTATCTTTA	Root	Metazoa	Arthropoda	Insecta	Diptera	Lonchopteridae	Lonchoptera	Lonchoptera bifurcata/uniseta	300	0	0	0	0	0	0	0	0	0	0	0	0	0	0	0	0	0	0	0	0	0	0	0	0	0	0	0	0	0	0	0	0	0	0	0	0	0	0	0
ASV278	TTTATCTTCTAATGTTGCTCATAGAGGAGCTTCTGTTGATTTAGCAATTTTCTCGTTACATTTCCCTGGAATTTCATCAATTTTAGGAGCTGTAAATTTTATTACAACTATTATTAATATACGATCAAAAGGAATTTCCTTTGACCGAATACCTTTATTTGTTTGATCAGTAGCAATTGCAGCTTTATTAATACTTTTATCATTA	Root	Metazoa	Arthropoda	Insecta	Diptera	Muscidae	Helina	Helina sp.	89	0	0	0	0	0	0	0	0	0	0	0	0	0	0	48	41	0	0	0	0	0	0	0	0	0	0	0	0	0	0	0	0	0	0	0	0	0	0	0
ASV279	TTTATCTTCTAATATTGCTCATAGAGGAGCTTCTGTAGATTTAGCAATTTTTTCTTTACATTTAGCTGGAATTTCATCTATTTTAGGAGCAGTAAATTTTATTACAACTATTATTAATATACGATCAAAAGGAATTTTATTTGATCGAATACCTTTATTTGTATGATCAGTAGCAATTACTGCTTTACTATTACTTTTATCATTA	Root	Metazoa	Arthropoda	Insecta	Diptera	Muscidae	Helina	Helina sp. MK265335.1	562980	0	31	70	17406	47851	7	7	0	2	0	223	125	0	0	67804	71132	0	0	85635	94831	0	1	6	32	2644	2701	0	0	1	0	14	4	1330	34	21	0	0	0	0
ASV280	GCTTTCAGCAGGGATTGCCCATGGAGGTGCTTCTGTTGATTTAACTATTTTTTCTTTACATTTAGCTGGAATTTCTTCAATTTTAGGAGCAGTTAATTTTATTACAACTGTAATTAATATACGAGCTACTGGAATTTCTTTTGATCGAATACCTTTATTTGTTTGATCAGTTGTTATTACCGCTATTTTATTACTTTTATCTTTA	Root	Metazoa	Arthropoda	Insecta	Diptera	Muscidae	Muscidae sp.	Muscidae sp. 1	13469	0	0	0	0	0	0	0	0	0	0	0	0	0	0	0	0	0	0	0	0	0	0	0	0	0	0	0	0	0	0	0	0	0	0	0	0	0	0	0
ASV281	ACTTTCTGCAGGTATTGCCCATGGAGGAGCTTCAGTTGATTTAGCAATTTTTTCATTACACTTGGCTGGAATTTCTTCAATTTTAGGAGCAGTTAATTTTATTACTACTGTAATTAATATACGATCCACAGGAATTACTTTTGATCGAATACCTCTGTTTGTCTGATCTGTGGTAATCACTGCATTATTACTTCTGTTATCTTTA	Root	Metazoa	Arthropoda	Insecta	Diptera	Muscidae	Muscidae sp.	Muscidae sp. 2	52	0	0	0	0	0	0	0	0	0	0	0	0	0	0	0	0	0	0	0	0	0	0	0	0	0	0	0	0	0	0	0	0	0	0	0	0	0	0	0
ASV282	TTTATCATCTAGTATTGCTCATAGAGGAGCTTCTGTAGATTTAGCTATTTTTTCATTACATTTAGCAGGAATTTCTTCAATTTTAGGAGCTGTAAATTTTATTACTACAATTATTAATATACGATCTTCTGGAATTACATTTGATCGAATACCCTTATTTGTATGATCTGTAGGAATTACAGCCTTATTACTTTTATTGTCTCTA	Root	Metazoa	Arthropoda	Insecta	Diptera	Phoridae	Megaselia	Megaselia sp. 1	10276	0	0	0	0	0	547	404	0	0	0	0	0	0	0	0	0	0	0	0	0	0	0	0	0	0	0	0	0	0	0	0	0	0	0	0	0	0	0	0
ASV283	CCTTTCTTCTAGAATTGCTCATAGAGGAGCTTCTGTAGATTTAGCAATTTTTTCTTTACATTTAGCCGGAATTTCCTCTATTTTAGGGGCCGTAAATTTCATTACAACAATTATTAATATACGATCTTCAGGAATTACCTTTGACCGTATACCTCTATTTGTTTGATCTGTTGGTATTACTGCTATTTTACTACTTTTATCTTTA	Root	Metazoa	Arthropoda	Insecta	Diptera	Phoridae	Megaselia	Megaselia sp. 2	3225	0	0	0	0	0	0	0	0	0	0	0	0	0	0	0	0	0	0	0	0	0	0	0	0	0	0	0	0	0	0	0	0	0	0	0	0	0	0	0
ASV284	TCTTTCTTCTAGAATTGCTCATAGTGGAGCTTCAGTTGATTTAGCTATTTTTTCTCTTCATTTAGCAGGAATTTCTTCAATTCTTGGAGCTGTAAATTTTATTACTACAATTATTAATATACGATCATCTGGAATTACTTTCGATCGAATACCTTTATTTGTTTGATCAGTAGGAATTACTGCTCTTTTGCTTTTATTATCATTA	Root	Metazoa	Arthropoda	Insecta	Diptera	Phoridae	Megaselia	Megaselia sp. 3	128	0	0	0	0	0	0	0	0	0	0	0	0	0	0	0	0	0	0	0	0	0	0	0	0	0	0	0	0	0	0	0	0	0	0	0	0	0	0	0
ASV285	CCTTTCTTCTAGAATTGCTCATAGAGGAGCTTCAGTTGATTTAGCAATTTTTTCTCTTCATTTAGCAGGTATTTCTTCAATTTTAGGAGCAGTAAATTTTATTACTACAATCATTAATATACGTTCTTCAGGAATTCATTTTGACCGAATACCATTATTTGTTTGATCAGTGGGAATTACAGCTTTATTACTTCTTTTATCCCTA	Root	Metazoa	Arthropoda	Insecta	Diptera	Phoridae	Phoridae sp.	Phoridae sp. 1	58726	0	0	0	0	0	1	0	3517	3692	0	0	0	0	0	78	68	0	0	0	0	0	0	0	0	257	295	45	820	0	0	0	0	0	0	0	0	0	0	0
ASV286	TCTAGCATCAAATATCGCTCATAGTGGATCATCTGTAGATTTAGCAATTTTTTCTCTACATTTAGCAGGTATCTCCTCAATTTTAGGAGCTGTAAATTTTATTACTACTATTATTAATATACGATCTATAGGTATTACATTTGATCGAATACCTTTATTTGTATGATCAGTAGGTATTACTGCATTATTATTATTACTTTCATTA	Root	Metazoa	Arthropoda	Insecta	Diptera	Phoridae	Phoridae sp.	Phoridae sp. 10	50	0	0	0	0	0	0	0	0	0	0	0	0	0	0	0	0	0	0	0	0	0	0	0	0	0	0	0	0	0	0	0	0	0	0	0	0	0	0	0
ASV287	CCTATCTGCTAGTATTGCTCATAGAGGAGCTTCAGTAGATTTAGCTATTTTTTCTCTTCATTTAGCTGGTGTATCTTCTATTTTAGGGGCTGTTAATTTTATTACAACAATTATTAATATACGATCCTCAGGTATCACTTTTGATCGAATACCTTTATTTGTGTGATCTGTAGGAATTACAGCTTTATTATTGTTACTATCTTTA	Root	Metazoa	Arthropoda	Insecta	Diptera	Phoridae	Phoridae sp.	Phoridae sp. 2	64787	0	0	1	0	0	10992	8801	534	450	1380	1133	657	0	0	285	314	17	51	0	0	56	30	0	0	0	0	883	18455	0	0	0	0	4	0	0	0	0	0	0
ASV288	CCTTTCTTCAAGAATTGCTCATAGAGGAGCTTCAGTAGATTTAGCAATTTTTTCTCTTCATTTAGCAGGAATTTCTAGAATTTTAGGTGCTGTAAATTTTATTACAACAATTATTAATATACGATCTTCAGGAATTTCTTTTGATCGAATACCTTTATTTGTTTGATCAGTAGGTATTACAGCTCTTTTACTTCTTCTTTCTCTT	Root	Metazoa	Arthropoda	Insecta	Diptera	Phoridae	Phoridae sp.	Phoridae sp. 3	9413	0	0	0	0	0	535	450	0	0	0	0	0	0	0	345	339	128	321	0	0	0	0	0	0	0	0	0	0	0	1	0	0	0	0	0	0	0	0	0
ASV289	ACTTTCTGCTAGAATCTCTCATAGAGGGGCTTCAGTTGATTTAGCTATTTTTAGTCTACACTTAGCGGGAATTTCATCCATTTTAGGAGCTGTAAATTTTATTACTACAATTATTAATATACGATCATCGGGTATTACTTTTGACCGAATACCTTTATTTGTATGATCTGTTGGTATTACAGCTTTATTACTTTTACTATCTTTA	Root	Metazoa	Arthropoda	Insecta	Diptera	Phoridae	Phoridae sp.	Phoridae sp. 4	3095	0	0	0	0	0	0	0	0	0	0	0	0	0	0	0	0	0	0	0	0	0	0	0	0	0	0	0	0	0	0	0	0	0	0	0	0	0	0	0
ASV290	CCTTTCTTCAAGAATTGCTCATAGTGGAGCTTCAGTTGATTTAGCAATTTTTTCTCTTCATTTAGCAGGAATTTCAAGAATTTTAGGAGCTGTTAATTTCATTACAACAATTATTAATATACGATCTTCAGGTATTTCATTTGACCGAATACCTTTATTTGTTTGATCAGTTGGTATTACAGCTCTACTACTTTTACTCTCTTTA	Root	Metazoa	Arthropoda	Insecta	Diptera	Phoridae	Phoridae sp.	Phoridae sp. 5	372	0	0	0	0	0	0	0	0	0	0	0	0	0	0	0	0	0	0	0	0	0	0	0	0	0	0	0	0	0	0	0	0	0	0	0	0	0	0	0
ASV291	TCTATCGTCTGGAATTGCTCATGGAGGTGCATCAGTTGATTTAGCAATTTTTTCATTACATTTAGCAGGAATTTCCTCAATTCTTGGAGCAGTAAATTTTATTACGACAGTAATTAATATACGATCAACAGGAATTACATTTGATCGAATACCTTTATTTGTGTGATCAGTAGTAATTACTGCTTTATTATTGCTTTTATCATTA	Root	Metazoa	Arthropoda	Insecta	Diptera	Phoridae	Phoridae sp.	Phoridae sp. 6	128	0	0	0	0	0	0	0	0	0	0	0	0	0	0	0	0	0	0	0	0	0	0	0	0	0	0	0	0	0	0	0	0	0	0	0	0	0	0	0
ASV292	CCTATCCGCTAGTATTGCTCATAGAGGAGCTTCAGTAGATTTAGCTATTTTTTCTCTTCATTTAGCTGGTGTGTCTTCTATTTTAGGAGCTGTAAATTTTATTACAACAATTATTAATATACGATCCTCAGGTATCACTTTTGATCGAATACCTCTATTTGTATGATCTGTAGGAATTACAGCTTTATTATTATTACTATCTTTA	Root	Metazoa	Arthropoda	Insecta	Diptera	Phoridae	Phoridae sp.	Phoridae sp. 7	110	0	0	0	0	0	60	50	0	0	0	0	0	0	0	0	0	0	0	0	0	0	0	0	0	0	0	0	0	0	0	0	0	0	0	0	0	0	0	0
ASV293	ACTTTCTGCTAGAATCTCTCATAGAGGGGCTTCAGTTGATTTAGCTATTTTTAGTTCACACTTAGCAGGAATTTCATCCATTTTAGGGGCTGTAAATTTTATTACTACAATTATTAATATACGATCATCAGGTATTACCTTTGACCGAATACCTTTATTTGTTTGATCTGTTGGTATTACAGCTTTATTACTTTTACTATCTTTA	Root	Metazoa	Arthropoda	Insecta	Diptera	Phoridae	Phoridae sp.	Phoridae sp. 8	59	0	0	0	0	0	0	0	0	0	0	0	0	0	0	0	0	0	0	0	0	0	0	0	0	0	0	0	0	0	0	0	0	0	0	0	0	0	0	0
ASV294	CCTTTCTTCAAGAATTGCTCATAGAGGAGCTTCAGTAGATTTAGCAATTTTTTCTCTTCATTTAGCAGGAATCTCCAGAATTTTAGGAGCTGTAAATTTTATTACAACTATTATCAATATACGATCCTCAGGAATTTCTTTTGATCGAATACCCTTATTTGTTTGATCGGTAGGTATCACGGCTCTTTTACTTCTTCTTTCTCTT	Root	Metazoa	Arthropoda	Insecta	Diptera	Phoridae	Phoridae sp.	Phoridae sp. 9	52	0	0	0	0	0	0	0	0	0	0	0	0	0	0	0	0	0	0	0	0	0	0	0	0	0	0	0	0	0	0	0	0	0	0	0	0	0	0	0
ASV295	TCTATCTAGTTTAATTTCTCACGGAGGGCCCTCAGTTGATTTAGCAATTTTTTCATTACATTTGGCCGGGATTTCTTCAATTTTAGGGGCTGTAAATTTTATTACTACAATTATTAATATACGATCTATTGGTATTACATTTGAACGAATGCCTTTATTTGTTTGATCTGTTTTAATTACAGCAGTATTATTACTTTTATCTCTA	Root	Metazoa	Arthropoda	Insecta	Diptera	Psychodidae	Psychoda	Psychoda albipennis	10942	0	0	0	0	0	1809	1505	0	0	1171	0	0	0	0	0	0	0	0	0	0	0	0	0	0	5	6	0	0	0	0	0	0	0	0	0	0	0	0	546
ASV296	TTTATCAAGTTTAATTTCTCATGGGGGTCCTTCCGTTGATTTAGCAATTTTTTCTTTACATTTAGCTGGGATTTCTTCTATTTTGGGGGCTGTAAATTTTATTACTACTATTATTAATATACGATCTATTGGTATTACATTTGAACGAATACCTTTATTTGTTTGATCAGTTCTTATTACAGCGGTTCTTCTTCTTCTTTCATTA	Root	Metazoa	Arthropoda	Insecta	Diptera	Psychodidae	Psychoda	Psychoda sp. JF872464.1	47109	0	0	0	0	0	0	0	0	0	0	0	0	0	0	0	0	7629	13828	0	0	0	0	0	0	0	0	0	0	3	1	0	0	0	0	0	0	0	0	0
ASV297	TTTATCAAGTTTAATTTCTCATGGAGGTCCTTCCGTTGATTTAGCAATTTTTTCTTTACATTTAGCTGGGATTTCTTCTATTTTGGGGGCTGTAAATTTTATTACTACTATTATTAATATACGATCTATTGGGATTACATTTGAACGAATACCTTTATTTGTTTGATCAGTTCTTATTACAGCGGTTCTTCTTCTTCTTTCATTA	Root	Metazoa	Arthropoda	Insecta	Diptera	Psychodidae	Psychoda	Psychoda sp. nr JF872464.1	5244	0	0	0	0	0	0	0	0	0	0	0	0	0	0	0	0	0	0	0	0	0	0	0	0	0	0	0	0	0	0	0	0	0	0	0	0	0	0	0
ASV298	GTTATCATCTGTAATTGCTCATGGAGGAGCTTCAGTTGATTTAGCAATTTTTTCTTTACATTTAGCTGGAATTTCAAGTATTTTAGGAGCAGTAAATTTTATTACTACAGTTATTAATATACGAAGAACAGGAATTACTTTTGATCGAATACCCCTATTTGTTTGATCAGTAGTAATTACAGCTTTACTTTTATTACTTTCTTTA	Root	Metazoa	Arthropoda	Insecta	Diptera	Sarcophagidae	Sarcophagidae sp.	Sarcophagidae sp.	117819	0	0	8	0	0	0	0	0	0	40314	2	0	0	0	0	0	0	0	0	0	0	0	0	0	0	0	0	0	38	42	0	0	0	0	0	0	0	0	0
ASV299	TCTTTCAAGTAATATTGCTCATAGTGGAGCTTCTGTTGATTTAGCTATTTTTTCACTTCATTTAGCAGGAATTTCATCTATTTTAGGGGCTGTAAATTTTATTACTACAGTAATTAATATACGATCAACAGGAATCACTTTAGATCGTATACCATTATTTGCTTGATCAGTTGTAATTACAGCTGTTTTACTACTTCTCTCTTTA	Root	Metazoa	Arthropoda	Insecta	Diptera	Scathophagidae	Scathophagidae sp.	Scathophagidae sp.	2968	0	0	0	0	0	0	0	0	0	0	0	0	0	0	0	0	0	0	0	0	0	0	0	0	0	0	0	0	0	0	0	0	0	0	0	0	0	0	0
ASV300	ATTATCGTCAACAATTGCTCATTCAGGGGCCTCTGTTGATCTATCAATTTTTTCTCTTCATTTAGCAGGGATTTCTTCAATTTTAGGTGCAGTAAATTTTATTTCTACAATTATTAATATACGAGCCCCAGGAATATCTTTTGATAAATTACCTTTATTTACTTGATCTGTTTTAATTACAGCAGTTTTATTATTATTATCTTTA	Root	Metazoa	Arthropoda	Insecta	Diptera	Sciaridae	Bradysia	Bradysia impatiens/difformis	253	0	0	0	0	0	0	0	0	0	0	0	0	0	0	0	0	0	0	0	0	0	0	0	0	0	0	0	0	0	0	0	0	0	0	0	0	0	0	0
ASV301	TCTTTCATCAACAATTTCCCATTCAGGTGCATCAGTTGATTTATCAATCTTTTCCCTTCATTTAGCAGGTATTTCTTCTATTTTAGGGGCAGTTAATTTTATTTCAACAATTATTAATATACGGGCTCCTGGAATATCTTTTGATAAAATACCTTTATTTGTATGATCAGTATTAATTACAGCTATTCTTTTATTGTTATCATTA	Root	Metazoa	Arthropoda	Insecta	Diptera	Sciaridae	Bradysia	Bradysia sp.	773	0	0	0	0	0	0	0	0	0	0	0	0	0	0	0	0	0	0	0	0	0	0	0	0	0	0	0	0	0	0	0	0	0	0	0	0	0	0	0
ASV302	CCTATCTTCTACTTTAGCTCATTCAGGGGCTTCCGTAGATTTATCTATTTTTTCTTTACATTTAGCGGGTATTTCCTCAATCTTGGGGGCAGTAAATTTTATTTCCACTATTATTAATATACGAGCCCCTGGAATATCTTTTGATAAAATACCATTATTTATTTGATCAGTTTTAATTACTGCAATTCTTCTTCTTCTATCCCTA	Root	Metazoa	Arthropoda	Insecta	Diptera	Sciaridae	Lycoriella	Lycoriella castanescens/sativae	2081	0	0	0	0	0	0	0	0	0	0	0	0	6	7	0	0	0	0	0	0	0	0	0	0	0	0	0	0	0	0	0	0	0	0	0	0	0	0	0
ASV303	CCTATCTTCTACCTTAGCTCATTCAGGAGCTTCTGTAGATTTATCTATTTTTTCTTTACATTTAGCAGGTATTTCTTCAATTTTAGGGGCCGTAAATTTTATTTCCACTATTATTAATATACGAGCCCCTGGAATAACCTTTGATAAAATACCATTATTTATTTGATCAGTTTTAATTACTGCAATTCTCCTTCTTCTATCCCTC	Root	Metazoa	Arthropoda	Insecta	Diptera	Sciaridae	Lycoriella	Lycoriella sp. KR776019.1	2566	0	0	0	0	0	0	0	0	0	0	0	0	0	0	0	0	0	0	0	0	0	0	0	0	0	0	0	0	0	0	0	0	0	0	0	0	0	0	0
ASV304	TTTATCTTCTACTTTATCTCATTCAGGAGCATCAGTAGATTTATCAATTTTTTCTTTACATTTAGCAGGTATTTCTTCAATTTTAGGAGCTGTAAATTTTATTTCTACAATTATTAATATACGAGCTCCTGGAATATCTTTTGATAAAATACCTTTATTTGTATGATCTGTATTAATTACTGCTATTTTATTATTATTATCATTA	Root	Metazoa	Arthropoda	Insecta	Diptera	Sciaridae	Sciaridae sp.	Sciaridae sp. 1	197985	0	11	8	0	0	18722	14603	3765	3538	0	1	3	419	911	0	0	0	0	0	0	2855	2654	6	7	0	0	0	0	10	17	11	3	1	0	25	0	0	1473	0
ASV305	TTTATCTTCAACCTTGTCTCATTCAGGGGCCTCAGTTGACTTATCTATTTTTTCTTTACATTTAGCTGGAATTTCCTCTATTTTGGGTGCTGTAAATTTTATTTCTACTATTATTAATATACGAGCCCCTGGAATATCTTTTGATAAAATACCTTTATTTGTTTGATCGGTATTAATTACGGCTATTTTATTATTACTATCTTTA	Root	Metazoa	Arthropoda	Insecta	Diptera	Sciaridae	Sciaridae sp.	Sciaridae sp. 2	124310	0	0	0	0	0	0	0	0	0	0	0	0	0	0	0	0	0	0	0	0	0	0	0	0	0	0	0	0	0	0	0	0	0	0	0	0	0	0	0
ASV306	TTTATCATCTACATTATCACATTCAGGTGCTTCAGTAGATTTATCAATTTTTTCTCTTCATTTAGCTGGGATCTCTTCAATTTTAGGGGCAGTAAATTTTATTTCTACAATTATTAATATACGAACTCCTGGAATATCTTTTGATAAAATACCTTTATTTGTATGATCAGTTTTAATTACAGCAATTTTATTACTTTTATCTTTA	Root	Metazoa	Arthropoda	Insecta	Diptera	Sciaridae	Sciaridae sp.	Sciaridae sp. 3	94477	0	0	0	0	0	0	0	0	0	0	0	0	0	0	0	0	0	0	0	0	0	0	0	0	0	0	0	0	3	6	0	0	0	0	0	0	0	0	0
ASV307	TTTATCTTCTACTATTTCTCATTCAGGAGCATCTGTGGATTTATCAATTTTTTCTTTACATTTAGCAGGTATTTCTTCTATTTTAGGGGCGGTTAATTTTATTTCTACAATTATTAATATACGAACTCCAGGAATAAGATTTGATAAGATACCTTTATTTGTTTGATCTGTATTAATTACAGCTATTCTATTGTTGTTATCATTA	Root	Metazoa	Arthropoda	Insecta	Diptera	Sciaridae	Sciaridae sp.	Sciaridae sp. 4	58402	0	0	0	0	0	1104	866	0	0	0	19	17	0	0	217	235	0	0	5161	5758	0	0	0	0	0	0	172	7976	0	0	0	0	0	0	0	0	0	0	0
ASV308	CCTTTCTTCTACCTTATCTCATTCTGGAGCTTCTGTTGATTTATCAATTTTTTCTCTTCATTTAGCAGGAATTTCATCAATTTTAGGGGCAGTAAATTTTATTTCTACAATTATTAATATACGGGCACCGGGAATATCTTTTGATAAAATACCTTTATTTGTTTGATCTGTTTTAATTACAGCTATTTTATTACTTTTATCTTTA	Root	Metazoa	Arthropoda	Insecta	Diptera	Sciaridae	Sciaridae sp.	Sciaridae sp. 5	38517	0	0	0	0	0	0	0	0	0	0	0	0	0	0	1	1	0	0	0	0	0	0	0	0	0	0	0	0	0	0	0	0	0	0	0	0	0	0	0
ASV309	TTTATCTACTACAATTTCACATTCTGGGGCATCAGTTGATTTATCTATTTTCTCATTACATTTAGCTGGTATTTCTTCAATTTTGGGGGCCGTTAATTTTATTTCTACAATTATTAATATACGAACCCCTGGAATAACTTTTGACAAAATACCGTTATTTGTATGATCTGTGTTAATTACTGCAATCCTTTTATTATTATCTTTA	Root	Metazoa	Arthropoda	Insecta	Diptera	Sciaridae	Sciaridae sp.	Sciaridae sp. 6	27502	0	0	0	0	0	0	0	0	0	0	0	0	0	0	0	0	0	0	0	0	0	0	0	0	0	0	0	0	0	0	0	0	0	0	0	0	0	0	0
ASV310	ACTTTCTTCTACAATTTCTCATTCCGGGGCATCTGTAGATTTATCTATTTTTTCTTTACATTTAGCAGGAATTTCATCTATTCTAGGAGCTGTAAATTTTATTTCTACAATCATTAATATACGGGCTCCAGGAATAAGATTTGATAAAATACCTTTATTTGTATGATCTGTATTAATTACAGCTATTTTATTGTTATTATCATTG	Root	Metazoa	Arthropoda	Insecta	Diptera	Sciaridae	Sciaridae sp.	Sciaridae sp. 7	25002	0	0	1	0	0	0	0	0	0	2883	42	8	1	3	0	0	0	0	8224	9409	0	0	0	0	0	0	0	0	0	0	0	0	0	0	0	0	0	0	0
ASV311	TTTATCTACTACAATTTCACATTCTGGGGCATCAGTTGATTTATCTATTTTCTCATTACACTTAGCTGGTATTTCTTCAATTTTGGGGGCCGTTAATTTTATTTCTACAATTATTAATATACGAGCCCCTGGAATAACTTTTGACAAAATACCATTATTTGTATGATCTGTATTAATTACTGCGATTCTTTTATTATTATCTTTA	Root	Metazoa	Arthropoda	Insecta	Diptera	Sciaridae	Sciaridae sp.	Sciaridae sp. 8	13355	0	0	0	0	0	0	0	0	0	0	0	0	0	0	0	0	0	0	0	0	0	0	0	0	0	0	0	0	0	0	0	1	0	0	11	0	0	0	1
ASV312	TCTTTCATCTACAATCTCCCATTCAGGGGCTTCTGTAGATTTATCTATTTTCTCATTACATTTAGCAGGTATTTCATCAATTTTAGGGGCAGTAAATTTTATTTCTACTATTTTAAATATACGGGCTCCCGGGATAACATTTGATAAAATACCATTATTTGTATGGTCAGTTTTAATTACGGCTATTTTATTACTTCTCTCTCTT	Root	Metazoa	Arthropoda	Insecta	Diptera	Sciaridae	Sciaridae sp.	Sciaridae sp. 9	5363	0	0	0	0	0	0	0	0	0	0	0	0	0	0	0	0	0	0	0	0	0	0	0	0	0	0	0	0	0	0	0	0	0	0	0	0	0	0	0
ASV313	TTTATCTTCTACTTTATCTCATTCAGGAGCTTCAGTTGATTTATCTATTTTTTCTTTACATTTAGCGGGTATTTCTTCAATTTTAGGGGCAGTAAATTTTATTTCTACAATTATTAATATACGAGCTCCTGGAATATCTTTTGATAAAATACCTTTATTTGTATGATCTGTATTAATTACAGCTATTTTATTGTTATTATCTTTA	Root	Metazoa	Arthropoda	Insecta	Diptera	Sciaridae	Sciaridae sp.	Sciaridae sp. 10	4442	0	0	0	0	0	0	0	0	0	0	0	0	0	0	0	0	0	0	0	0	0	0	0	0	0	0	0	0	0	0	0	0	0	0	0	0	0	0	0
ASV314	TTTATCTTCTACATTATCTCATTCAGGGGCTTCTGTAGATTTATCTATTTTTTCTCTTCATTTAGCTGGAATTTCTTCAATTTTAGGCGCTGTTAATTTTATTTCTACAATTATTAATATACGAGCTCCTGGTATATCTTTTGACAAAATACCTTTATTTGTATGATCAGTATTAATTACTGCTATTTTATTATTATTATCATTG	Root	Metazoa	Arthropoda	Insecta	Diptera	Sciaridae	Sciaridae sp.	Sciaridae sp. 11	3250	0	0	0	0	0	0	0	0	0	0	0	0	0	0	0	0	0	0	0	0	0	0	0	0	0	0	0	0	0	0	0	0	0	0	0	67	233	0	0
ASV315	TTTATCTACTACAATTTCACATTCTGGTGCATCAGTAGATTTATCAATTTTTTCCTTACATTTAGCGGGTATTTCTTCTATTTTAGGTGCTGTTAATTTTATTTCTACAATTATTAATATACGAACCCCTGGGATAACTTTTGATAAAATACCTTTATTTGTGTGATCTGTTTTAATTACTGCAATTTTACTATTACTATCACTA	Root	Metazoa	Arthropoda	Insecta	Diptera	Sciaridae	Sciaridae sp.	Sciaridae sp. 12	2221	0	0	0	0	0	0	0	0	0	0	0	0	0	0	0	0	0	0	0	0	0	0	0	0	0	0	26	1294	0	0	0	0	0	0	0	0	0	0	0
ASV316	TCTATCGTCAACTTTATCCCATTCTGGGGCTTCAGTTGATTTATCTATTTTTTCTTTACATTTAGCAGGAATTTCTTCTATTTTAGGAGCTGTTAATTTTATTTCCACAATTATCAATATGCGAGCCCCAGGCATATCTTTTGATAAAATACCTCTATTTGTTTGATCTGTATTAATCACTGCAATCCTTCTTCTTTTATCCCTA	Root	Metazoa	Arthropoda	Insecta	Diptera	Sciaridae	Sciaridae sp.	Sciaridae sp. 13	1839	0	0	0	0	0	0	0	0	0	0	0	0	0	0	0	0	0	0	0	0	0	0	0	0	0	0	0	0	0	0	0	0	0	0	0	0	0	0	0
ASV317	TTTATCTTCAACTTTATCTCATTCAGGAGCTTCTGTAGATTTATCAATTTTTTCTCTTCATTTAGCTGGTATTTCATCCATTCTAGGGGCTGTAAATTTTATTTCAACAATTATTAATATACGTGCACCTGGAATATCTTTTGATAAAATACCATTATTTGTTTGATCTGTTTTAATTACAGCAATTTTATTACTTTTATCTTTA	Root	Metazoa	Arthropoda	Insecta	Diptera	Sciaridae	Sciaridae sp.	Sciaridae sp. 14	1705	0	0	0	0	0	0	0	0	0	0	0	0	0	0	0	0	0	0	0	0	0	0	0	0	0	0	0	0	0	0	0	0	0	0	0	0	0	0	0
ASV318	TTTATCTACTACAATTTCACATTCTGGGGCATCTGTTGATTTATCAATTTTTTCATTACATTTGGCTGGAATCTCTTCAATTTTGGGGGCAGTTAATTTTATTTCTACAATTATTAATATGCGAGCCCCTGGAATAACTTTTGATAAAATACCATTATTTGTTTGATCTGTATTAATTACTGCAATTCTATTATTATTATCTTTA	Root	Metazoa	Arthropoda	Insecta	Diptera	Sciaridae	Sciaridae sp.	Sciaridae sp. 15	1333	0	0	0	0	0	0	0	0	0	0	0	0	0	0	0	0	0	0	0	0	0	0	0	0	0	0	0	0	0	0	0	0	0	0	0	0	0	0	0
ASV319	TCTATCGTCAACTTTATCTCATTCGGGGGCTTCTGTAGATTTATCTATTTTTTCTTTACATCTCGCGGGGATTTCTTCTATTCTAGGGGCAGTAAATTTTATTTCAACAATTATTAATATACGAGCTCCAGGTATATCTTTTGATAAAATACCCTTATTTGTTTGATCTGTATTAATTACAGCAATTTTACTTCTTTTATCTTTA	Root	Metazoa	Arthropoda	Insecta	Diptera	Sciaridae	Sciaridae sp.	Sciaridae sp. 16	1193	0	0	0	0	0	0	0	0	0	0	0	0	0	0	0	0	0	0	0	0	0	0	0	0	0	0	0	0	0	0	0	0	0	0	0	0	0	0	0
ASV320	ACTTTCTACTACAATTTCTCATTCAGGAGCATCTGTTGATTTATCTATTTTTTCTTTACATTTAGCAGGGATTTCCTCTATTTTAGGGGCTGTAAATTTTATTTCAACAATTATTAATATACGAGCCCCGGGAATAAGATTTGATAAAATACCCCTATTTGTATGATCTGTATTAATTACAGCTATTTTACTACTTTTATCACTA	Root	Metazoa	Arthropoda	Insecta	Diptera	Sciaridae	Sciaridae sp.	Sciaridae sp. 17	1060	0	0	0	0	0	0	0	0	0	0	0	0	0	0	515	545	0	0	0	0	0	0	0	0	0	0	0	0	0	0	0	0	0	0	0	0	0	0	0
ASV321	TTTATCTTCAACTATTGCTCATTCAGGGGGATCAGTTGATTTATCTATTTTTTCTTTACATCTAGCAGGTATTTCCTCAATTTTAGGGGCAGTAAACTTTATTTCTACAATTATTAATATACGGGCCCCAGGTATAAGGTTTGATAAAATACCTTTATTTGTATGATCAGTATTAATTACAGCTATCTTATTACTTCTTTCATTA	Root	Metazoa	Arthropoda	Insecta	Diptera	Sciaridae	Sciaridae sp.	Sciaridae sp. 18	784	0	0	0	0	0	0	0	0	0	0	0	0	0	0	0	0	0	0	0	0	0	0	0	0	0	0	0	0	0	0	0	0	0	0	0	0	0	0	0
ASV322	CCTTTCTACTACAATTTCTCATTCAGGAGCATCTGTAGATTTATCTATTTTTTCTTTACATTTAGCTGGGATTTCATCTATTCTAGGGGCTGTAAATTTTATTTCTACTATTATTAACATACGAGCCCCAGGGATAAGATTTGATAAAATACCTTTATTTGTATGATCTGTATTAATTACAGCTATTTTATTATTATTATCATTA	Root	Metazoa	Arthropoda	Insecta	Diptera	Sciaridae	Sciaridae sp.	Sciaridae sp. 19	520	0	0	0	0	0	0	0	0	0	391	0	0	0	0	0	0	0	0	0	0	0	0	0	0	0	0	0	0	0	0	0	0	0	0	0	0	0	0	0
ASV323	TTTATCTTCAACAATTTCTCACTCAGGTGCGTCAGTAGATTTATCTATTTTTTCTTTACATTTAGCGGGAATTTCTTCTATTCTAGGGGCTGTAAATTTTATTTCAACGATTATTAATATGCGGGCCCCAGGTATATCTTTTGATAAAATACCACTATTTGTATGATCAGTTTTAATTACAGCAATTCTACTACTACTTTCACTG	Root	Metazoa	Arthropoda	Insecta	Diptera	Sciaridae	Sciaridae sp.	Sciaridae sp. 20	222	0	0	0	0	0	0	0	0	0	0	0	0	0	0	0	0	0	0	0	0	0	0	0	0	0	0	0	0	0	0	0	0	0	0	0	0	0	0	0
ASV324	GTTATCTACAACAATTTCGCACTCTGGTGCATCAGTAGATTTATCAATTTTCTCATTACATTTAGCTGGTATTTCTTCAATTTTGGGGGCTGTTAATTTTATTTCTACAATTATCAATATACGAACTCCTGGAATAACTTTTGATAAAATACCATTATTTGTTTGATCTGTATTAATTACTGCAATCCTTTTATTATTATCTTTA	Root	Metazoa	Arthropoda	Insecta	Diptera	Sciaridae	Sciaridae sp.	Sciaridae sp. 21	182	0	0	0	0	0	0	0	0	0	0	0	0	0	0	0	0	0	0	0	0	0	0	0	0	0	0	0	0	0	0	0	0	0	0	0	0	0	0	0
ASV325	TTTATCTTCTACTATTTCTCATTCAGGAGCATCTGTGGATTTATCAATTTTTTCTTTACATTTAGCAGGTATTTCTTCTATTTTAGGGGCTTTTAATTTTATTTCTACAATTATTAATATACGAACTCCAGGAATAAGATTTGATAAGATACCTTTATTTGTTTGATCTGTATTAATTACAGCTATTTTATTGTTGTTATCATTA	Root	Metazoa	Arthropoda	Insecta	Diptera	Sciaridae	Sciaridae sp.	Sciaridae sp. 22	145	0	0	0	0	0	0	0	0	0	0	0	0	0	0	0	0	0	0	28	32	0	0	0	0	0	0	0	0	0	0	0	0	0	0	0	0	0	0	0
ASV326	ACTTTCTTCCACAATTTCCCATTCTGGGGCTTCTGTAGACTTATCTATTTTTTCATTACATTTAGCTGGTATTTCATCAATTTTAGGTGCAGTAAATTTTATTTCCACAATTTTAAATATACGAGCCCCCGGAATAACATTTGATAAAATACCTTTATTTGTTTGATCCGTTTTAATTACTGCTATTTTATTATTACTTTCTCTT	Root	Metazoa	Arthropoda	Insecta	Diptera	Sciaridae	Sciaridae sp.	Sciaridae sp. 23	108	0	0	0	0	0	0	0	0	0	0	0	0	0	0	0	0	0	0	0	0	0	0	0	0	0	0	0	0	0	0	0	0	0	0	0	0	0	0	0
ASV327	ACTATCTACTACAATCTCTCATTCCGGAGCATCTGTAGATTTATCTATTTTTTCTTTACATTTAGCGGGAATTTCATCTATTCTAGAGGCTGTTAATTTTATTTCTACAATCATTAATATACGGGCCCCAGGAATGAGATTTGATAAAATACCTTTATTTGTATGATCTGTATTAATTACAGCTATTTTATTATTATTATCATTA	Root	Metazoa	Arthropoda	Insecta	Diptera	Sciaridae	Sciaridae sp.	Sciaridae sp. 24	72	0	0	0	0	0	0	0	0	0	22	0	0	0	0	0	0	0	0	0	0	0	0	0	0	0	0	0	0	0	0	0	0	0	0	0	0	0	0	0
ASV328	TTTATCTACTACAATTTCACATTCTGGTGCATCAGTTGATTTATCTATTTTTTCATTACATTTAGCTGGTGTTTCTTCAATTTTGGGGGCTGTTAATTTTATTTCTACAATTATTAATATACGAGCCCCTGGAATAACTTTTGATAAAATACCGTTATTTGTGTGATCTGTATTAATTACAGCAATCCTTTTATTATTATCTTTA	Root	Metazoa	Arthropoda	Insecta	Diptera	Sciaridae	Sciaridae sp.	Sciaridae sp. 25	65	0	0	0	0	0	0	0	0	0	0	0	0	0	0	0	0	0	0	0	0	0	0	0	0	0	0	0	0	0	0	0	0	0	0	0	0	0	0	0
ASV329	TTTATCTTCAGGAATTGCCCATGCCGGAGCTTCCGTGGATTTAGCTATTTTCTCTTTACATTTAGCTGGAATTTCTTCAATTTTAGGAGCTGTAAATTTTATTACAACTATTATTAATATACGATCTAATGGAATTACTTTCGATCGAATACCTTTATTTGTGTGATCAGTAATTATTACTGCTATTTTACTTTTACTTTCGTTA	Root	Metazoa	Arthropoda	Insecta	Diptera	Simuliidae	Austrosimulium	Austrosimulium furiosum	584	0	3	4	0	0	0	1	0	0	0	0	0	191	382	0	0	0	0	0	0	0	0	0	3	0	0	0	0	0	0	0	0	0	0	0	0	0	0	0
ASV330	TCTTTCTTCAGGAATTGCTCATGCTGGAGCTTCTGTTGATTTAGCAATTTTTTCTTTGCATCTCGCCGGGATTTCTTCAATTTTAGGGGCAGTAAATTTTATTACAACAATTATTAACATACGATCAAATGGGATTACTTTTGATCGAATACCTTTATTTGTGTGATCAGTCGTAATTACTGCAGTACTATTACTTCTTTCACTT	Root	Metazoa	Arthropoda	Insecta	Diptera	Simuliidae	Simulium	Simulium ornatipes	54659	0	0	0	0	0	0	0	0	0	0	0	0	0	0	0	0	0	0	0	0	0	0	0	0	0	0	0	0	0	0	0	0	0	0	0	0	0	0	0
ASV331	TTTATCATCTGGAATTGCTCATGGAGGGGCTTCAGTTGATTTAGCTATTTTTTCTTTACATTTAGCGGGGATCTCTTCTATTTTAGGAGCAGTAAATTTTATCACCACTGTAATTAATATGCGATCCACAGGAATCACTTTTGACCGAATACCTTTATTTGTATGATCAGTTGTAATTACAGCATTATTATTACTATTATCTTTA	Root	Metazoa	Arthropoda	Insecta	Diptera	Sphaeroceridae	Coproica	Coproica hirticula	1880	0	0	0	0	0	0	0	0	0	0	0	0	0	0	0	0	0	0	0	0	0	0	0	0	0	0	0	0	0	0	0	0	0	0	0	0	0	0	0
ASV332	TTTATCTTCTGGTATTGCTCATGGTGGTGCTTCTGTTGACTTAGCAATTTTTTCTTTACATTTAGCAGGAGTATCATCTATTTTAGGAGCAGTAAATTTTATTACAACAGTAATTAATATACGATCTACAGGAATTACATTTGACCGAATACCTTTATTTGTTTGATCTGTAGTAATTACAGCTTTATTACTTTTACTTTCATTA	Root	Metazoa	Arthropoda	Insecta	Diptera	Sphaeroceridae	Nearcticorpus	Nearcticorpus sp.	256	0	0	0	0	0	0	0	0	0	0	0	0	0	0	0	0	0	0	0	0	0	0	0	0	119	137	0	0	0	0	0	0	0	0	0	0	0	0	0
ASV333	TCTTTCTTCTGGAATTGCACATGGAGGAGCATCAGTAGATTTAGCAATTTTTTCTTTACATTTAGCAGGAATTTCGTCAATTTTAGGAGCTGTAAATTTTATTACAACAGTTATTAATATACGAGCTACTGGAATTACCTTTGATCGAATACCTTTATTTGTATGATCAGTAGTAATTACAGCTTTATTATTATTATTATCTCTT	Root	Metazoa	Arthropoda	Insecta	Diptera	Sphaeroceridae	Pullimosina	Pullimosina heteroneura	3017	0	0	0	0	0	0	0	0	0	0	0	0	0	0	0	0	0	0	0	0	0	0	0	0	0	0	0	0	0	0	0	0	0	0	0	0	0	0	0
ASV334	TCTTTCTTCTGGAATTGCACATGGAGGAGCATCAGTAGATTTAGCTATTTTTTTCTTACATTTAGCAGGAATTTTATCAATTTTAGGAGCTGTAAATATTATTACAACAGTTATTAATATACGAGCCATTGGAATTACTTTTGATCGAATGCCTTTATTTGTATGATCAGTAGTAATTACAGCTTTACTATTATTATTATCCCTC	Root	Metazoa	Arthropoda	Insecta	Diptera	Sphaeroceridae	Pullimosina	Pullimosina sp.	279	0	0	0	0	0	0	0	0	0	0	0	0	0	0	0	0	0	0	0	0	0	0	0	0	0	0	0	0	0	0	0	0	0	0	0	0	0	0	0
ASV335	TCTATCTTCTGGAATCGCTCATGGTGGAGCTTCTGTTGATTTAGCTATTTTTTCTTTACATTTGGCTGGAATTTCTTCTATTTTAGGTGCAGTAAATTTTATTACTACAGTTATTAATATACGATCTACAGGAATTACATTTGACCGAATACCTTTATTTGTTTGATCTGTAGTAATTACAGCATTATTATTATTATTATCTTTA	Root	Metazoa	Arthropoda	Insecta	Diptera	Sphaeroceridae	Rachispoda	Rachispoda sp.	382	0	0	0	0	0	0	0	0	0	0	0	0	0	0	0	0	0	0	0	0	0	0	0	0	0	0	0	0	0	0	0	0	0	0	0	0	0	0	0
ASV336	TCTTTCATCTGGGATTGCACATGGTGGAGCTTCAGTAGATTTAGCTATTTTTTCTTTACATTTAGCTGGAATTTCTTCAATTTTAGGAGCTGTAAATTTTATTACAACAGTAATTAATATACGATCTACAGGAATTACATTTGATCGAATACCTTTATTTGTATGATCTGTAGTAATTACAGCATTATTATTACTATTATCACTA	Root	Metazoa	Arthropoda	Insecta	Diptera	Sphaeroceridae	Sphaeroceridae sp.	Sphaeroceridae sp. 1	28164	0	0	0	0	0	2	0	12280	11839	162	0	0	0	0	0	0	0	0	0	0	0	0	3	3	0	0	0	0	4	0	0	0	0	0	0	0	0	0	0
ASV337	ACTTTCATCTGGGATTGCTCATGGTGGAGCTTCAGTAGATTAAGCAATTTTTTCTTTACATTTAGCTGGAATTTCTTCAATTTTAGGAGCTGTAAATTTTATTACAACAGTAATAAATATACAATCTATAGGAATTACTTTTGATCGAATACCTTTATTTGTGTGATCTGTAGTAATTACAGCATTTTTATTATTACTATCATTG	Root	Metazoa	Arthropoda	Insecta	Diptera	Sphaeroceridae	Sphaeroceridae sp.	Sphaeroceridae sp. 2	83	0	0	0	0	0	0	0	53	30	0	0	0	0	0	0	0	0	0	0	0	0	0	0	0	0	0	0	0	0	0	0	0	0	0	0	0	0	0	0
ASV338	TCTATCTTCTAACATTGCTCATGGAGGAGCTTCTGTTGATTTAGCTATTTTCTCTCTTCATTTAGCTGGAATTTCCTCAATTTTAGGAGCTGTAAATTTTATTACAACTGTAATTAATATACGATCTACAGGAATTACATTCGATCGAATACCTTTATTTGTTTGATCTGTAGTAATTACTGCGTTATTACTTTTATTATCATTG	Root	Metazoa	Arthropoda	Insecta	Diptera	Sphaeroceridae	Trachyopella	Trachyopella lineafrons	1214	0	0	0	0	0	0	0	0	0	0	0	0	0	0	0	0	0	0	0	0	0	0	0	0	0	0	0	0	0	1	0	0	0	0	0	0	0	0	0
ASV339	TCTTTCAGCTAGAATTGCTCATGGTGGAGCTTCTGTAGATTTAGCTATTTTTTCTCTTCATTTAGCTGGTATATCTTCAATTTTAGGAGCAGTAAATTTTATTACAACTGTAATTAATATACGATCTAATGGAATTTCATATGACCGAATACCTTTATTTGTATGATCAGTAGTAATTACAGCTTTATTACTTTTATTATCATTA	Root	Metazoa	Arthropoda	Insecta	Diptera	Syrphidae	Melangyna	Melangyna collatus/viridiceps	50599	0	0	0	0	0	0	0	0	0	0	0	0	0	0	0	0	0	0	0	0	0	0	0	0	0	0	0	0	0	0	0	0	0	0	0	0	0	0	0
ASV340	TCTTTCAGCTAGAATTGCTCATGGTGGAGCTTCTGTAGATTTAGCTTTTTTTTCTATTCATTTAGCTGGTATATCTTCAATTTTAGGGGCAGTAAATTTTATTACAACTGTAATTAATATACGATCTAATGGAATTTCATATGACCGAATACCTTTATTTGTATGACCAGTAGTGATTACAGCTTTATTACTTTTATTTTCATTA	Root	Metazoa	Arthropoda	Insecta	Diptera	Syrphidae	Melangyna	Melangyna nr collatus	59	0	0	0	0	0	0	0	0	0	0	0	0	0	0	0	0	0	0	0	0	0	0	0	0	0	0	0	0	0	0	0	0	0	0	0	0	0	0	0
ASV341	TCTTTCTGCTAGAATTGCTCATGGAGGAGCATCTGTTGATTTAGCTATTTTTTCTCTTCATTTAGCCGGAATATCATCAATTTTAGGAGCAGTAAATTTTATTACTACAGTAATTAATATACGATCAAATGGAATTTCATATGATCGAATACCATTATTTGTATGATCAGTTGTAATTACTGCATTACTATTATTATTATCTTTA	Root	Metazoa	Arthropoda	Insecta	Diptera	Syrphidae	Simosyrphus	Simosyrphus grandicornis	155279	0	0	0	0	0	0	0	0	0	0	0	0	0	0	0	0	0	0	0	0	0	0	0	0	0	0	0	0	0	0	0	0	0	0	0	0	0	0	0
ASV342	ACTTTCATCAATTATTGCTCATGGAGGAGCCTCAGTTGATTTAGCAATTTTTTCTCTTCATTTAGCCGGAGTTTCTTCAATTTTAGGGGCCGTAAATTTTATTACAACAGTAATTAATATACGATCAACAGGAATTACATTTGACCGAATACCTTTATTTGTATGATCAGTTGTTATTACAGCTTTATTATTATTATTATCTTTA	Root	Metazoa	Arthropoda	Insecta	Diptera	Tachinidae	Meigenia	Meigenia sp.	444	0	0	0	0	0	0	0	0	0	0	0	0	0	0	0	0	0	0	0	0	0	0	0	0	0	0	0	0	0	0	0	0	0	0	0	0	0	0	0
ASV343	TTTATCAGCTGGAATTGCTCATGGTGGAGCTTCTGTTGATTTAGCCATTTTTTCTTTACATTTAGCAGGAATTTCTTCAATTTTAGGGGCTGTAAATTTTATTACAACAGTGATTAATATACGATCTACAGGAATTACTTTTGACCGAATACCTTTATTTGTTTGATCAGTTGTAATTACAGCTATTTTACTTTTATTATCTTTA	Root	Metazoa	Arthropoda	Insecta	Diptera	Tachinidae	Tachinidae sp.	Tachinidae sp. 1	11839	0	0	0	0	0	0	0	0	0	0	0	0	0	0	0	0	0	0	0	0	0	0	0	0	0	0	0	0	0	0	0	0	0	0	0	0	0	0	0
ASV344	GCTATCTTCAACTATTGCCCATAATGGAGCTTCAGTTGATTTAGCAATTTTCTCATTACACTTAGCCGGAATTTCTTCAATTTTAGGCGCTGTAAATTTTATTACAACAGTAATTAATATACGTGCAACAGGAATTACTTTTGACCGAATACCTTTATTTGTATGATCTGTAGTTATTACAGCATTATTATTATTATTATCATTA	Root	Metazoa	Arthropoda	Insecta	Diptera	Tachinidae	Tachinidae sp.	Tachinidae sp. 2	823	0	0	0	0	0	0	0	0	0	0	0	0	0	0	0	0	0	0	0	0	0	0	0	0	0	0	4	819	0	0	0	0	0	0	0	0	0	0	0
ASV345	TTTATCAGCTGGAATTGCTCATGCAGGGGCTTCTGTAGATTTAGCTATTTTTTCTTTACATTTAGCGGGAATTTCCTCAATTTTAGGGGCTGTAAATTTTATTACAACAGTAATTAATATACGATCTACAGGAATTACATTTGATCGAATGCCTCTTTTTGTTTGAGCTGTTGTAATTACAGCAGTATTATTACTGTTATCCTTA	Root	Metazoa	Arthropoda	Insecta	Diptera	Tipulidae	Tipulidae sp.	Tipulidae sp.	88	0	0	0	0	0	0	0	0	0	0	0	0	0	0	0	0	0	0	0	0	0	0	0	0	0	0	0	0	0	0	0	0	0	0	0	0	0	0	0
ASV346	ACTATCTTCTGGTATTGCTCATGCCGGAGCATCAGTTGATTTAGCAATTTTTTCTCTTCATTTAGCAGGAATTTCATCAATCCTTGGAGCTGTAAATTTTATTACTACTGTAATTAATATACGATCAACCGGGATTACTCTTGATCGAATACCTTTATTTGTTTGATCTGTTGTAATCACAGCTGTTCTTCTTCTTCTATCTTTA	Root	Metazoa	Arthropoda	Insecta	Diptera	Trichoceridae	Nothotrichocera	Nothotrichocera cranstoni	8950	0	0	0	0	0	0	0	0	0	0	0	0	0	0	0	0	0	0	0	0	0	0	0	0	0	0	0	0	0	0	0	0	0	0	0	0	0	0	0
ASV347	GCTTTCTCTCAGATTATCTCATAGGAGATGTTCAGTGGATTTTTCAATTTTGTCTTTACACATTGCAGGAGCATCTTCTATCTTAGGTGCAATAAATTTTATTGTAACAATTTTTAATATACGACTATTGGGTATAAGATTTGAATCATTAAGATTATTTGTTTGGTCTGTATTAATTACTGTTTTTTTACTATTAATTTCGCTA	Root	Metazoa	Arthropoda	Insecta	Hemiptera	Aleyrodidae	Siphoninus	Siphoninus phillyreae	88	0	0	0	0	0	0	0	0	0	0	0	0	0	0	0	0	0	0	0	0	0	0	0	0	0	0	0	0	0	0	0	0	0	0	0	0	0	0	0
ASV348	ACTTTCCAATTCAATATTTCATAGAGGGTATTCTGTTGATATTGCTATTTTTTCACTTCATTTGGCTGGGGTTTCTTCTATTTTGGGAGCAATTAATTTTATTACTACAATTATTAATATGCGTTCTTCTCTTTACCCTCTTGAAAAAATACCTTTATTCGTTTGATCAGTACTAATTACTGCTTTTTTATTACTTTTTTCTTTA	Root	Metazoa	Arthropoda	Insecta	Hemiptera	Aphalaridae	Anoeconeossa	Anoeconeossa unicornuta	495	0	0	0	0	0	0	0	0	0	0	0	0	0	0	0	0	0	0	0	0	0	0	0	0	0	0	0	0	0	1	0	3	0	0	0	0	0	319	0
ASV349	TTTATCTAATAGAGTATTTCATAGAGGATATTCTGTAGATGTAGCTATTTTTTCTCTTCATTTAGCAGGTATTTCTTCTATTTTAGGTGCAATTAATTTTATTACTACAATTATTAATATACGATCTTCTTTATATCCTATAGAAAAAATACCTTTATTTGTTTGATCTGTTTTTATTACTGCTTTTTTATTATTATTTTCTTTA	Root	Metazoa	Arthropoda	Insecta	Hemiptera	Aphalaridae	Blastopsylla	Blastopsylla occidentalis	27	0	0	0	0	0	0	0	0	0	0	0	0	0	0	0	0	0	0	0	0	0	0	0	0	0	0	0	0	0	0	0	0	0	0	0	0	0	0	0
ASV350	TTTATCTAATTCTATATTTCATAGAGGATACTCTGTAGACACAGCAATTTTCTCCCTGCATTTAGCAGGAATTTCTTCTATCTTAGGAGCAATTAATTTCATCACAACTATTATGAATATGCGATCTTCTCTGTACTCTATAGAAAAAATACCTCTATTTGTTTGATCTGTTTTAATTACAGCAATCTTACTTCTATTATCCCTA	Root	Metazoa	Arthropoda	Insecta	Hemiptera	Aphalaridae	Ctenarytaina	Ctenarytaina eucalypti	65352	0	0	0	0	0	0	0	0	0	0	0	0	0	0	0	0	0	0	0	0	0	0	0	0	0	0	0	0	0	2	35825	26637	0	0	0	0	0	0	0
ASV351	TTTATCAAATAATATTGCACATAATAATATTTCAGTTGATTTAACTATCTTCTCTTTACATTTAGCAGGAATTTCATCAATTTTAGGAGCAATTAACTTCATTTGTACAATTCTTAATATAATACCTAATAATATAAAATTAAATCAAATTCCACTTTTCCCTTGATCAATTTTAATTACAGCTATTTTATTAATTTTATCTTTA	Root	Metazoa	Arthropoda	Insecta	Hemiptera	Aphididae	Acyrthosiphon	Acyrthosiphon kondoi	27875	0	0	0	0	0	0	0	0	0	0	0	0	0	0	0	0	0	0	0	0	0	0	0	0	0	0	0	0	0	0	0	0	0	0	0	0	0	0	0
ASV352	TTTATCAAATAATATTGCACATAATAACATTTCAGTTGATTTAACTATTTTTTCTTTACACCTAGCAGGAATTTCATCAATTTTAGGAGCAATTAATTTTATTTGTACAATTCTTAATATAATACCTAATAACATAAAATTAAATCAAATTCCACTTTTCCCTTGATCAATTTTAATTACAGCTATCTTATTAATTTTATCTTTA	Root	Metazoa	Arthropoda	Insecta	Hemiptera	Aphididae	Acyrthosiphon	Acyrthosiphon pisum	3636	0	0	0	0	0	0	0	0	0	0	0	0	0	0	0	0	0	0	0	0	0	0	0	0	25	37	0	0	0	0	0	1	0	19	23	0	0	446	0
ASV353	TCTTTCAAACAATATTGCACATAATAATATTTCAGTTGATTTAACCATTTTTTCATTACATCTAGCTGGAATCTCCTCTATTCTAGGAGCAATTAATTTTATTTGTACAATTTTAAATATAATACCCCACAATATAAAATTAAATCAAATCCCATTGTTTCCCTGATCAATTTTAATTACAGCTATTTTATTAATTCTTTCTTTA	Root	Metazoa	Arthropoda	Insecta	Hemiptera	Aphididae	Aphididae sp.	Aphididae sp. 1	7363	0	0	0	0	0	0	0	0	0	0	0	0	0	0	0	0	0	0	0	0	0	0	0	0	0	0	0	0	0	0	0	0	0	0	0	0	0	0	0
ASV354	TTTATCAAACAATATTGCACATAATAATATTTCAGTTGATTTAACTATTTTTTCTTTACATCTAGCAGGAATTTCATCAATTTTAGGAGCAATTAATTTTATTTGTACAATTTTAAATATAATACCAAATAATATAAAATTAAACCAAATTCCTCTTTTTCCTTGATCAATTCTAATTACAGCTATTTTATTAATCTTATCTTTA	Root	Metazoa	Arthropoda	Insecta	Hemiptera	Aphididae	Aphididae sp.	Aphididae sp. 2	106	0	0	0	0	0	0	0	0	0	0	0	0	0	0	0	0	0	0	0	0	0	0	0	0	0	0	0	0	0	0	0	0	0	0	0	0	0	0	0
ASV355	TTTATCAAACAATATTGCTCATAATAACATTTCAGTTGATTTAACTATTTTCTCTCTTCATTTAGCAGGTATTTCATCAATTTTAGGAGCAATTAATTTTATTTGTACTATTCTTAATATAATACCGAATAATATAAAATTAAATCAAATTCCATTATTCCCTTGATCAATCCTAATTACAGCTATATTATTAATTTTATCATTA	Root	Metazoa	Arthropoda	Insecta	Hemiptera	Aphididae	Aphis	Aphis craccivora	7519	0	0	0	0	0	0	0	0	0	0	0	0	0	0	0	0	0	0	0	0	0	0	0	0	24	0	0	0	0	0	0	0	0	0	0	0	0	0	0
ASV356	TTTATCAAATAATATTGCTCATAACAATATTTCAGTTGACTTAACTATTTTTTCTCTTCACCTAGCAGGTATTTCATCAATCTTAGGAGCAATCAATTTTATTTGTACAATTCTTAATATAATACCCAATAATATAAAATTAAATCAAATCCCTTTATTTCCATGATCAATCCTAATTACAGCTATACTATTAATTTTATCTTTA	Root	Metazoa	Arthropoda	Insecta	Hemiptera	Aphididae	Aphis	Aphis lugentis	1000	0	0	0	0	0	0	0	0	0	0	0	0	0	0	0	0	0	0	0	0	0	0	0	0	0	0	0	0	0	0	0	0	0	0	0	0	0	0	0
ASV357	TTTATCAAATAATATCGCTCATAATAATATTTCAGTTGATTTAACTATCTTCTCTTTACATTTAGCAGGTATTTCATCAATTTTAGGAGCAATTAACTTTATTTGTACAATCCTAAATATAATACCAAATAATATAAAATTAAATCAAATTCCTTTATTTCCATGATCAATCCTAATTACAGCTATACTATTAATTTTATCTTTA	Root	Metazoa	Arthropoda	Insecta	Hemiptera	Aphididae	Aphis	Aphis oenotherae	38	0	0	0	0	0	0	0	0	0	0	0	0	0	0	0	0	0	0	0	0	0	0	0	0	0	0	0	0	0	0	0	0	0	0	0	0	0	0	0
ASV358	TTTATCAAACAATATTGCTCATAATAACATTTCAGTTGATTTAACTATTTTCTCTCTACATTTAGCAGGTATTTCATCAATTTTAGGAGCAATTAATTTTATTTGTACTATTCTTAATATAATACCAAATGATATAAAATTAAATCAAATTCCTTTATTCCCTTGATCAATCTTAATTACAGCTATATTATTAATTTTATCCTTA	Root	Metazoa	Arthropoda	Insecta	Hemiptera	Aphididae	Aphis	Aphis sp.	61	0	0	0	0	0	0	0	0	0	0	0	0	0	0	0	0	0	0	0	0	0	0	0	0	0	0	0	0	0	0	0	0	0	0	0	0	0	0	0
ASV359	TTTATCAAACAACATTGCTCATAATAATATTTCAGTTGATTTAACTATTTTCTCATTACACTTAGCAGGAATTTCATCAATTTTAGGAGCAATTAATTTTATTTGCACTATTTTAAATATAATACCTAATAATATAAAACTAAATCAAATTCCTCTTTTCCCATGATCAATTTTAATTACAGCTATTTTACTAATTTTATCTTTA	Root	Metazoa	Arthropoda	Insecta	Hemiptera	Aphididae	Brachycaudus	Brachycaudus helichrysi	1049	0	0	0	0	0	7	6	0	0	0	0	0	0	0	0	0	0	0	0	0	0	0	0	0	0	0	0	0	0	0	1	0	0	0	0	0	0	24	0
ASV360	ATTATCAAATAATATTGCTCATAATAATATTTCAGTTGATTTAACTATTTTTTCTTTACACTTAGCAGGAATTTCCTCAATTTTAGGAGCAATTAACTTTATTTGCACTATTTTAAATATAATACCAAATAATATAAAACTAAATCAAATTCCTCTTTTTCCATGATCAATTTTAATTACAGCTATTTTATTAATTTTATCTTTA	Root	Metazoa	Arthropoda	Insecta	Hemiptera	Aphididae	Brachycaudus	Brachycaudus rumexicolens	113951	0	0	0	0	0	0	0	0	0	0	0	0	11	30	0	0	0	0	0	0	0	0	0	1	29	35	0	0	0	0	2	0	0	0	0	0	0	260	0
ASV361	TCTATCAAATAATATTGCTCATAATAATATTTCAGTTGATTTAACTATTTTTTCTTTACATTTAGCAGGAATTTCATCAATTTTAGGAGCAATTAATTTTATCTGTACAATTCTAAATATAATACCTAATAATATAAAATTAAATCAAATTCCTCTTTTTCCATGATCAATTTTAATTACAGCTATTTTATTAATCTTATCTCTC	Root	Metazoa	Arthropoda	Insecta	Hemiptera	Aphididae	Brevicoryne	Brevicoryne brassicae	98214	0	0	0	0	0	0	0	0	0	0	0	0	0	0	0	0	0	0	0	0	0	0	0	0	0	0	0	0	0	0	0	0	0	0	0	0	0	0	0
ASV362	ATTATCAAATAATATTGCTCATAATAATATTTCAGTTGATTTAACTATTTTTTCTTTACACTTAGCAGGAATTTCATCAATTTTAGGAGCAATTAATTTTATTTGTACAATTTTAAATATAATACCTAATAATTTAAAATTAAATCAAATTCCTCTTTTTCCATGATCAATTCTAATTACAGCTATTCTATTAATCTTATCTTTA	Root	Metazoa	Arthropoda	Insecta	Hemiptera	Aphididae	Diuraphis	Diuraphis noxia	214327	0	0	1	0	0	0	0	0	0	232	0	3	0	5	0	0	0	0	0	0	638	663	0	0	0	0	0	0	0	1	0	0	0	42	35	0	0	67	0
ASV363	ACTATCAAATAATATTGCACACAATAATATTTCAGTTGATTTAACTATTTTTTCTTTACATTTAGCAGGTATCTCATCAATTTTAGGAGCAATTAATTTTATTTGCACAATTTTAAATATAATACCAAATAATATAAAATTAAACCAAATCCCTCTTTTCCCATGATCAATTTTAATTACAGCAGTTTTATTAATTTTATCTTTA	Root	Metazoa	Arthropoda	Insecta	Hemiptera	Aphididae	Dysaphis	Dysaphis aucupariae	1008	0	0	0	0	0	0	0	0	0	0	0	0	0	0	0	0	0	0	0	0	0	0	0	0	0	0	0	0	0	0	0	0	0	0	0	0	0	0	0
ASV364	ATTATCAAACAATATTGCACATAATAATATTTCAGTAGATTTAACTATTTTCTCCTTACATTTAGCAGGAATTTCATCAATTTTAGGAGCAATTAATTTTATTTGTACTATTTTAAATATAATACCAAATAATATAAAATTAAATCAAATTCCACTTTTTCCATGATCAATTTTAATTACAGCCATTTTATTAATTTTATCTCTA	Root	Metazoa	Arthropoda	Insecta	Hemiptera	Aphididae	Dysaphis	Dysaphis tulipae	44	0	0	0	0	0	0	0	0	0	0	0	0	0	0	0	0	0	0	0	0	0	0	0	0	0	0	0	0	0	0	0	0	0	0	0	0	0	0	0
ASV365	TTTATCAAATAATATTGCACATAATAATATTTCAGTTGACTTAACTATTTTTTCCTTACATTTAGCAGGAATCTCATCAATTTTAGGAGCAATTAATTTTATTTGTACAATTTTAAATATAATACCTAATAATATAAAATTAAATCAGATTCCTCTTTTTCCTTGATCAATTTTAATTACAGCTATTTTATTAATTTTATCTTTA	Root	Metazoa	Arthropoda	Insecta	Hemiptera	Aphididae	Hyperomyzus	Hyperomyzus lactucae	750	0	0	0	0	0	0	0	0	0	566	0	0	0	0	0	0	0	0	0	0	0	0	0	0	0	0	0	0	0	0	0	0	0	0	0	0	0	0	0
ASV366	TTTATCAAATAATATTGCTCACAATAATATTTCAGTTGATTTAACTATTTTTTCTCTACACTTAGCAGGAATCTCTTCAATTTTAGGAGCAATTAATTTTATCTGCACAATCCTAAATATAATACCTAATAATATAAAATTAAATCAAATTCCTCTTTTCCCATGATCAATTTTAATTACAGCTATTTTATTAATTTTATCTCTA	Root	Metazoa	Arthropoda	Insecta	Hemiptera	Aphididae	Lipaphis	Lipaphis pseudobrassicae	7112	0	0	0	0	0	0	0	0	0	0	0	0	0	0	0	0	0	0	0	0	0	0	0	0	0	0	0	0	1	1	0	0	0	0	0	0	0	0	0
ASV367	TTTATCAAATAACATTGCACATAACAATATTTCAGTTGATTTAACTATTTTTTCATTACATTTAGCAGGAATCTCCTCAATTTTAGGAGCAATTAACTTTATTTGTACAATTCTTAATATAATACCAAATAATATAAAATTAAATCAAATCCCTCTTTTCCCTTGATCAATTTTAATTACAGCTATTTTATTAATTTTATCTTTA	Root	Metazoa	Arthropoda	Insecta	Hemiptera	Aphididae	Metopolophium	Metopolophium dirhodum	5944	0	0	0	0	0	0	0	0	0	0	0	0	0	0	0	0	0	0	0	0	0	0	0	0	0	0	0	0	0	0	0	0	0	0	0	0	0	3	0
ASV368	CTTATCAAATAATATTGCACATAATAATATTTCAGTTGATTTAACTATTTTTTCATTACATTTAGCAGGAATTTCATCAATTTTAGGAGCAATTAATTTTATTTGTACAATCTTAAATATAATACCAAACAATATAAAATTAAACCAAATCCCTTTATTTCCATGATCAATTTTAATTACAGCTATTTTATTAATTTTATCTTTA	Root	Metazoa	Arthropoda	Insecta	Hemiptera	Aphididae	Myzus	Myzus persicae	269602	0	0	4	0	0	0	0	143	125	0	0	0	39	98	0	0	0	0	0	0	0	0	0	0	2246	2397	0	0	7	7	6	7	17	35	20	136	654	1178	1
ASV369	TTTATCAAATAATATTGCACATAATAATATTTCAGTTGATTTAACTATTTTTTCATTACATTTAGCAGGAATTTCATCAATCTTAGGAGCAATTAATTTTATTTGTACAATTATAAATATAATACCAAACAATATAAAATTAAATCAAATTCCTTTATTCCCTTGATCAATTTTAATTACAGCTATTTTATTAATTCTATCTTTA	Root	Metazoa	Arthropoda	Insecta	Hemiptera	Aphididae	Nasonovia	Nasonovia ribisnigri	97	0	0	0	0	0	0	0	0	0	0	0	0	0	0	0	0	0	0	0	0	0	0	0	0	0	0	0	0	0	0	0	0	0	0	0	0	0	0	0
ASV370	ATTATCAAACAATATTGCACATAATAATATTTCAGTTGATTTAACTATTTTTTCATTACACTTAGCTGGAATCTCTTCAATTTTAGGTGCAATTAATTTTATTTGTACAATTTTAAATATAATACCAAATAATATAAAATTAAACCAAATCCCTCTTTTCCCTTGATCAATCTTAATTACAGCTATTTTATTAATTTTATCTTTA	Root	Metazoa	Arthropoda	Insecta	Hemiptera	Aphididae	Nearctaphis	Nearctaphis bakeri	657	0	0	0	0	0	0	0	0	0	0	0	0	0	0	0	0	0	0	0	0	0	0	0	0	0	0	0	0	0	0	0	0	0	0	0	0	0	0	0
ASV371	ATTATCTAATAATATTGCTCATAATAATATTTCAGTTGATTTAACAATTTTTTCACTTCATTTAGCAGGAATTTCCTCAATCTTAGGAGCAATTAATTTTATTTGTACAATTTTAAATATAATACCTAATAATATAAAACTAAATCAAATTCCACTTTTTCCTTGATCAATTTTAATCACAGCTATACTATTAATCTTATCACTA	Root	Metazoa	Arthropoda	Insecta	Hemiptera	Aphididae	Rhopalosiphum	Rhopalosiphum maidis	41	0	0	0	0	0	0	0	0	0	0	0	0	0	0	0	0	0	0	0	0	0	0	0	0	0	0	0	0	0	0	0	0	0	0	0	0	0	16	0
ASV372	TTTATCTAATAATATTGCTCATAATAATATTTCAGTTGATTTAACAATTTTTTCTCTACATTTAGCAGGAATCTCATCAATTTTAGGGGCAATTAATTTTATTTGTACAATTTTAAATATAATACCTAATAATATAAAATTAAACCAAATTCCATTATTCCCTTGATCAATTTTAATTACAGCTATATTATTAATTTTATCTTTA	Root	Metazoa	Arthropoda	Insecta	Hemiptera	Aphididae	Rhopalosiphum	Rhopalosiphum padi	168434	0	3	0	0	0	12	3	81	80	0	2	3	51	94	0	0	0	0	0	0	33	38	0	2	1438	1516	0	432	59867	80774	273	199	0	0	2	0	31	1517	2
ASV373	CTTATCTAATAATATTGCTCATAATAATATTTCAGTCGATTTAACAATTTTTTCTCTTCATTTAGCAGGAATTTCATCAATTTTAGGAGCAATCAATTTTATCTGTACAATTTTAAATATAATACCTAATAATATAAAATTAAATCAAATTCCACTATTTCCTTGATCAATTTTAATTACAGCTATATTATTAATTTTATCATTA	Root	Metazoa	Arthropoda	Insecta	Hemiptera	Aphididae	Rhopalosiphum	Rhopalosiphum rufiabdominalis	5001	0	0	0	0	0	0	1	0	0	0	0	0	14	19	0	0	0	0	0	0	0	0	0	0	12	20	0	0	0	0	0	0	0	0	0	0	0	22	0
ASV374	TTTATCAAATAATATTGCACATAATAATATCTCAGTTGATTTAACTATTTTTTCTTTACATTTAGCAGGAATCTCATCAATTTTAGGAGCAATTAATTTTATTTGTACAATTCTTAATATAATACCAAATAATATAAAATTAAATCAAATTCCTCTTTTTCCTTGATCAATTCTAATTACAGCTATCTTATTAATCTTATCCCTA	Root	Metazoa	Arthropoda	Insecta	Hemiptera	Aphididae	Sitobion	Sitobion sp. MF831094.1	1781	0	0	0	0	0	0	0	0	0	0	0	0	0	0	0	0	0	0	0	0	0	0	0	0	0	0	0	0	0	0	0	0	0	0	0	0	0	0	0
ASV375	TTTATCAAATAATATTGCACATAACAATATTTCAGTTGATTTAACAATTTTTTCTTTACATTTAGCAGGAATTTCATCAATCTTAGGAGCAATTAATTTTATTTGTACAATTTTAAATATAATACCAAATAATATAAAATTAAATCAAATTCCTCTTTTCCCTTGATCAATCTTAATTACAGCTATTTTATTAATTTTATCATTA	Root	Metazoa	Arthropoda	Insecta	Hemiptera	Aphididae	Uroleucon	Uroleucon erigeronensis	88	0	0	0	0	0	0	0	0	0	0	0	0	0	0	0	0	0	0	0	0	0	0	0	0	0	0	0	0	0	0	0	0	0	0	0	0	0	0	0
ASV376	TTTATCAAATAATATTGCACATAATAATATTTCAGTTGATTTAACAATTTTCTCTCTACATTTAGCAGGAATCTCATCAATTTTAGGAGCAATTAACTTTATTTGTACAATTTTAAATATAATACCAAATAATATAAAATTAAATCAAATCCCTCTCTTCCCTTGATCAATTTTAATTACAGCTATTCTATTAATTTTATCATTA	Root	Metazoa	Arthropoda	Insecta	Hemiptera	Aphididae	Uroleucon	Uroleucon sonchi	525	0	0	0	0	0	0	0	0	0	0	0	0	0	0	0	0	0	0	0	0	0	0	0	0	0	0	0	0	0	0	0	0	0	0	0	0	0	0	0
ASV377	ACTATCTTCTAATATTTCTCACTCTGGGGCGAGAGTCGATCTAACTATTTTCTCCCTACACTTAGCTGGTATTTCATCTATTCTTGGAGCTATTAACTTTATTACAACAGTAATTAATATACGTTCACCCGGTATAAAAATAGATCAAACTCCATTATTTGTATGATCTGTATTAATTACTGCCATCCTTCTTCTTCTCTCACTC	Root	Metazoa	Arthropoda	Insecta	Hemiptera	Cicadellidae	Austroagallia	Austroagallia torrida	5046	0	0	0	0	0	0	0	0	0	0	0	0	0	0	0	0	0	0	0	0	0	0	0	0	0	0	0	0	0	0	0	0	0	0	0	0	0	0	0
ASV378	TCTATCTAGAAATATTGCTCACGCAGGACCAAGAGTTGATATAGCTATTTTTTCTCTTCATTTAGCTGGTATTTCTTCTATTTTAGGTGCAGTAAATTTTATTACTACAGTTATAAATATACGACCGACTGGAATGGATATAGATAAAACACCTCTATTCGTTTGATCTGTAATTATTACAGCTGTGTTATTATTGCTTTCTTTA	Root	Metazoa	Arthropoda	Insecta	Hemiptera	Cicadellidae	Balclutha	Balclutha incisa	5220	0	0	0	0	0	0	0	0	0	5217	0	3	0	0	0	0	0	0	0	0	0	0	0	0	0	0	0	0	0	0	0	0	0	0	0	0	0	0	0
ASV379	ACTATCAGCTAATATTGCTCATTCAGGGGCAAGAGTTGATTTAGCAATTTTTTCTTTACATTTAGCAGGTATTTCATCAATTCTTGGGGCAGTAAATTTTATTACAACAGTAATTAATATACGATCTAAAAACTTAACTTTAGATCGAATTCCATTATTTGTATGATCAGTAGTTATTACTGCAGTTTTACTGTTACTTTCTTTA	Root	Metazoa	Arthropoda	Insecta	Hemiptera	Cicadellidae	Cicadellidae sp.	Cicadellidae sp. 1	2646	0	0	0	0	0	0	0	0	0	0	0	0	29	32	0	0	0	0	0	0	0	0	0	0	0	0	0	0	0	0	0	0	0	0	0	0	0	81	0
ASV380	ACTTTCTAGAAATATTGCTCACGCAGGACCAAGAGTTGATATATCAATTTTTTCTCTTCACTTAGCAGGAATATCATCAATTTTAGGTGCAATTAATTTCATCACTACAGTAATAAATATACGACCTGCTGGAATAACAATAGAACGAACTCCTTTATTTGTATGATCTGTACTAATTACAGCAATCCTACTGCTATTGTCATTA	Root	Metazoa	Arthropoda	Insecta	Hemiptera	Cicadellidae	Cicadellidae sp.	Cicadellidae sp. 2	1799	0	0	0	0	0	0	0	0	0	0	0	0	0	0	0	0	0	0	0	0	0	0	0	0	0	0	0	0	0	0	0	0	0	0	0	0	0	0	0
ASV381	CCTATCAAGAAATATCGCCCATGAAGGGCCTAGAGTAGACATATCTATTTTTTCATTGCACTTAGCTGGTATCTCTTCAATTCTAGGGGCAGTAAATTTTATTACAACAGTAATAAATATACGACCAAGAGGAATAACTATAGACCGAACACCACTATTTGTATGATCTGTGCTTATTACAGCTGTACTACTATTATTGTCACTA	Root	Metazoa	Arthropoda	Insecta	Hemiptera	Cicadellidae	Orosius	Orosius argentatus	34843	0	0	0	0	0	0	0	0	0	0	0	0	0	0	0	0	0	0	0	0	0	0	0	0	0	0	0	0	0	0	0	0	0	0	0	0	0	0	0
ASV382	ACTTTCAAGAAACATTGCTCACGAAGGACCTAGAGTAGATATATCCATTTTCTCCTTACACTTAGCAGGAATTTCATCAATTCTAGGTGCTGTTAATTTTATTACTACAGTAATAAATATACGACCAACAGGGATAACATTAGATCGAACCCCTTTATTTGTCTGATCCGTACTAATTACAGCTGTGTTATTATTATTATCACTA	Root	Metazoa	Arthropoda	Insecta	Hemiptera	Cicadellidae	Orosius	Orosius canberrensis	83	0	0	0	0	0	0	0	0	0	0	0	0	13	21	0	0	0	0	0	0	0	0	0	0	0	0	0	0	0	0	0	0	0	0	0	0	0	0	0
ASV383	CCTATCAAGCAACATTGCTCATGAAGGACCTAGAGTGGATATATCTATTTTTTCGTTACACTTAGCAGGTATCTCCTCAATCCTGGGAGCAGTAAATTTTATTACAACAGTAATAAATATACGACCTATAGGAATAACTATAGATCGAACACCATTATTTGTATGATCTGTCCTTATTACAGCTGTTCTATTGTTATTATCCCTA	Root	Metazoa	Arthropoda	Insecta	Hemiptera	Cicadellidae	Orosius	Orosius cellulosa	34858	0	0	0	0	0	0	0	0	0	0	0	0	0	0	0	0	0	0	0	0	0	0	0	0	0	0	0	0	0	0	0	0	0	0	0	0	0	0	0
ASV384	CTTATCTAGTAATATCGCTCACGAAGGACCTAGTGTAGATATATCTATTTTTTCATTACACTTAGCAGGTATTTCATCAATTCTAGGAGCAGTAAATTTTATTACAACAGTTATTAACATACGGCCGACAGGAATAACTATAGATCGAACCCCTTTGTTTGTATGATCTGTACTTATTACAGCCGTTCTACTATTGCTGTCACTA	Root	Metazoa	Arthropoda	Insecta	Hemiptera	Cicadellidae	Orosius	Orosius orientalis	8561	0	0	0	0	0	0	0	0	0	0	0	0	0	0	0	0	0	0	0	0	0	0	0	0	0	0	0	0	0	0	0	0	0	0	0	0	0	0	0
ASV385	CTTATCTAGTAATATTGCTCACGAAGGACCTAGTGTAGATATATCTATTTTTTCATTGCACTTAGCAGGTATTTCATCAATTCTAGGGGCAGTAAATTTTATCACAACAGTTATTAACATGCGGCCAATAGGAATAACTATGGATCGAACCCCTTTATTTGTATGGTCTGTACTTATTACATCCGTTCTACTATTATTATCACTA	Root	Metazoa	Arthropoda	Insecta	Hemiptera	Cicadellidae	Orosius	Orosius sp.	24	0	0	0	0	0	0	0	0	0	0	0	0	0	0	0	0	0	0	0	0	0	0	0	0	0	0	0	0	0	0	0	0	0	0	0	0	0	0	0
ASV386	ATTATCATCTAATATTGCTCACTCTGGACCTAGAGTTGATTTAGCTATTTTTTCTCTACATTTAGCAGGAATTTCTTCTATTTTAGGGGCAGTAAATTTTATTACTACTGTATTAAATATACGAGCTCCTATAATAACATTAGACCGAACTTCATTATTTGTTTGATCAGTAATTATTACTGCAGTTTTACTTCTTCTTTCTCTA	Root	Metazoa	Arthropoda	Insecta	Hemiptera	Hemiptera sp.	Hemiptera sp.	Hemiptera sp. 1	4003	0	0	0	0	0	0	0	0	0	0	0	0	0	0	0	0	0	0	0	0	0	0	0	0	0	0	0	0	0	0	0	0	0	0	0	0	0	0	0
ASV387	TTTATCATCAAATATTTCACATGCAGGAGCTTCTGTGGACTTAGCAATTTTCTCACTACACTTAGCAGGAGTGTCATCAATTCTAGGGGCAGTAAACTTTATCTCAACAATTATTAACATACGACCAGAAGGAATAGTAGCAGAGCGAATCCCATTATTTGTATGATCTGTAGGAATCACTGCCTTACTACTACTCTTATCTCTA	Root	Metazoa	Arthropoda	Insecta	Hemiptera	Hemiptera sp.	Hemiptera sp.	Hemiptera sp. 2	1266	0	0	0	0	0	0	0	0	0	0	0	0	0	0	0	0	0	0	0	0	0	0	0	0	0	0	0	0	0	0	0	0	0	0	0	0	0	0	0
ASV388	ACTGTCCAGACAAAGAGCCCACTCAGGACCATCAGTAGATTTAACAATTTTTTCACTCCACATCGCAGGAGTAAGATCAATTCTTGGAGCAATTAATTTTATTTCAACTATTATAAATATACGAACAAAAGAAATAACAATAGAAAAAACACCATTATTCTGTTGATCTGTATTAATTACAGCTATTTTATTATTAATATCTTTA	Root	Metazoa	Arthropoda	Insecta	Hemiptera	Hemiptera sp.	Hemiptera sp.	Hemiptera sp. 3	53	0	2	0	0	1	0	0	0	0	0	16	1	0	0	1	0	3	5	0	0	1	0	5	10	0	1	0	0	1	4	0	0	0	0	0	0	0	0	0
ASV389	TTTATCAAATAATCTATTTCATAGAGGAGCTTCAGTGGATTTAGCAATCTTCTCTTTACATTTAGCAGGAGTATCATCTATTTTAGGAGCTATTAATTTTATTTCAACTATTATAAATATACGACCTTATGGTATATTACCTGAACAGATTCCTTTATTTGTTTGATCTGTAGGAATTACTGCTCTTTTATTACTTTTATCTTTA	Root	Metazoa	Arthropoda	Insecta	Hemiptera	Rhyparochromidae	Rhyparochromidae sp.	Rhyparochromidae sp.	318	0	0	0	0	0	0	0	0	0	0	0	0	0	0	0	0	0	0	0	0	0	0	0	0	0	0	0	0	0	0	0	0	0	0	0	0	0	0	0
ASV390	ATTATCGAATAATTTATTCCATAGAGGACCATCAGTTGACATAGCAATTTTTTCATTACATTTAGCAGGAGTATCCTCAATTCTAGGAGCAATTAATTTCATTTCAACTATTATAAATATACGACCTGCAGGTATATTACCAGAACAAATCCCCCTATTTGTTTGATCAGTAGGTATTACTGCATTATTACTATTATTATCCTTA	Root	Metazoa	Arthropoda	Insecta	Hemiptera	Hemiptera sp.	Hemiptera sp.	Hemiptera sp. GU671566.1	77	0	0	0	0	0	0	0	0	0	0	0	0	0	0	0	0	0	0	0	0	0	0	0	0	0	0	0	0	0	0	0	0	0	0	0	0	0	0	0
ASV391	ATTATCTAATTCTATATTCCATAGAGGTGCTCCTGTTGATATAGCAATTTTTTCATTACATTTAGCAGGTATTTCCTCAATTTTAGGAGCAATTAATTTTATCTCTACAATTATTAATATACGACCAGCAGGGATAACACCTGAAAAAACACCATTATTTGTATGATCAGTAGGTATTACAGCATTATTATTATTATTATCCTTA	Root	Metazoa	Arthropoda	Insecta	Hemiptera	Lygaeidae	Nysius	Nysius caledoniae	1395	0	0	0	0	0	0	0	0	0	0	0	0	0	0	0	0	0	0	0	0	0	0	0	0	0	0	0	0	1	0	0	0	0	0	0	0	0	0	0
ASV392	ACTATCAGCAAATATTGCACATAATGGGGCATCCGTTGACTTAGCAATTTTCTCATTACACTTAGCTGGTATTTCATCAATTTTAGGAGCTGTAAATTTCATTTCAACAATTATTAATATACGACCAAATGGAATAAAGGCAGAAATAATTCCATTATTTGTATGATCAGTTGCTATTACAGCTGTATTATTACTATTATCATTA	Root	Metazoa	Arthropoda	Insecta	Hemiptera	Miridae	Coridromius	Coridromius chenopoderis	36332	0	0	0	0	0	0	0	0	0	0	0	0	0	0	0	0	0	0	2	0	0	0	0	0	0	0	0	0	14184	18374	0	0	0	0	0	0	0	317	0
ASV393	ACTATCAGCAAATATTTCCCATAATGGGGCATCTGTAGATCTAGCTATCTTTTCACTACATTTAGCAGGAGTATCATCTATTCTTGGAGCAGTAAATTTTATCTCAACAATTATCAATATACGACCAGCCGGAATAACAGCAGATCGAATCCCATTATTCGTATGATCAGTAGGAATTACTGCATTACTATTACTATTATCTTTA	Root	Metazoa	Arthropoda	Insecta	Hemiptera	Miridae	Miridae sp.	Miridae sp.	81	0	0	8	0	0	0	0	0	0	1	36	1	0	0	0	0	0	0	0	0	0	0	0	0	0	0	0	4	11	11	3	2	2	0	0	0	0	0	0
ASV394	CCTTTCTAATAGACTATTCCATAGAGGAGCCTCCGTAGATCTAGCTATTTTCTCACTTCACTTAGCAGGTGTTTCATCTATTTTGGGAGCAATCAACTTTATTTCAACTATTATTAATATACGACCAGCAGGGATAAGTCCCGAACGCATCCCACTATTTGTTTGATCTGTAGGTATTACTGCATTATTACTATTATTATCATTA	Root	Metazoa	Arthropoda	Insecta	Hemiptera	Oxycarenidae	Oxycarenus	Oxycarenus luctuosus	699	0	0	0	0	0	0	0	0	0	0	0	0	0	9	0	0	0	0	0	0	0	0	0	0	0	0	0	0	0	0	0	0	0	0	0	0	0	0	0
ASV395	TATCTAATAATATTGCTCATAATAATATTTCTGTTGATTTAACTATTTTTTCTCTCCATTTAGCTGGAATTTCATCAATTTTAGGAGCAATTAATTTTATTTGTACTATTCTAAATATAATACCTAATAATATAAAATTAAATCAAATTCCTTTATTCCCATGATCAATTCTTATTACAGCTATTTTACTAATTTTATCCTTA	Root	Metazoa	Arthropoda	Insecta	Hemiptera	Pemphigidae	Aploneura	Aploneura lentisci	322	0	0	0	0	0	0	0	0	0	0	0	0	0	0	0	0	0	0	0	0	0	0	0	0	0	0	0	0	0	0	0	0	0	0	0	0	0	0	0
ASV396	TTTATCTAACAATATTGCACATAATAATATTTCTGTAGATTTAACTATTTTTTCCCTTCATTTAGCAGGAATTTCCTCAATTTTAGGAGCTATTAATTTTATTTGTACAATTCTAAATATAATACCTCATAATATAAAACTAAATCAAATCCCTTTATTTCCATGATCAATTTTAATTACAGCAATTTTATTAATTCTTTCACTA	Root	Metazoa	Arthropoda	Insecta	Hemiptera	Pemphigidae	Pemphigus	Pemphigus populitransversus	251	0	0	0	0	0	0	0	0	0	0	0	0	0	0	0	0	0	0	0	0	0	0	0	0	0	0	0	0	0	0	0	0	0	0	0	0	0	0	0
ASV397	ATTGTCAGGTATACAAAGTCACAGTGGTCCTAGTGTAGATTTAGCTATATTCGCACTTCACCTATCAGGTATAAGTAGTCTATTAGGAGCTATGAATTTTATAACAACTATACTAAATATGAGAAGTCCAGGAATAAGATTACACAAATTGGCTTTATTTGGATGAGCAGTAGTGGTTACAGCAGTTTTATTACTTTTATCTTTA	Root	Metazoa	Arthropoda	Insecta	Hemiptera	Pentatomidae	Rhacognathus	Rhacognathus americanus	56	0	0	0	0	0	0	0	0	0	0	0	0	0	0	0	4	0	0	0	0	1	2	5	2	0	0	0	0	0	0	0	0	0	0	0	4	5	0	0
ASV398	TCTATCGAACGCTATATTCCACAGAGGTTATTCTGTAGACATAGCAATCTTTTCTTTACATCTTGCAGGCATTTCCTCAATTTTAGGAGCTATTAATTTTATTACCACAATTATTAATATACGAAGATGTCTACATAAAATAGAAACTCTCCCTCTATTTGTGTGATCAGTTTTAATCACAGCATTCCTTCTGCTACTAGCATTA	Root	Metazoa	Arthropoda	Insecta	Hemiptera	Psyllidae	Acizzia	Acizzia acaciaebaileyanae	92	0	0	0	0	0	0	0	0	0	0	0	0	0	0	0	0	0	0	0	0	0	0	0	0	0	0	0	0	0	0	0	0	0	0	0	0	0	0	0
ASV399	ACTATCAAGTAATATTGCACATAACGGGGCATCCGTAGATTTAACAATCTTTTCACTACACTTAGCCGGTGTATCATCTATTTTAGGGGCAATTAATTTTATCTCAACTATTATTAACATACGAACAATTGGAATATCAAGAGAAAAAATTCCACTATTTGTCTGATCTGTAGGAATTACAGCATTATTGCTATTATTATCATTA	Root	Metazoa	Arthropoda	Insecta	Hemiptera	Veliidae	Veliidae sp.	Veliidae sp.	3649	0	0	0	0	0	0	0	0	0	0	0	0	0	0	0	0	0	0	0	0	0	0	0	0	0	0	0	0	0	0	0	0	0	0	0	0	0	0	0
ASV400	TTTATCAGGAGGAATTGCTCATGGAGGAGCTTCAGTTGATTTAGCTATTTTTTCTTTACATTTAGCTGGAATTTCTTCTATTTTAGGAGCTGTAAATTTTATTACAACTGTAATTAATATACGAGCTACAGGAATTACATTTGATCGAATACCTTTATTTGTGTGATCAGTTGTAATTACAGCTTTATTACTATTACTCTCATTA	Root	Metazoa	Arthropoda	Insecta	Hymenoptera	Apidae	Amegilla	Amegilla bombiformis	1820	4	0	0	0	0	0	0	0	0	0	0	0	0	0	0	0	0	0	0	0	0	0	0	0	310	310	0	0	0	1	0	0	0	9	7	0	0	0	0
ASV401	ATTATCAGCATATTTATATCATTCTTCACCTTCAGTAGATTTTGCAATTTTTTCTCTTCATATATCAGGAATTTCCTCAATTATAGGATCATTAAACTTAATAGTTACAATTATAATAATAAAAAATTTTTCTATAAATTATGACCAAATTTCATTATTTCCATGATCAGTTTTTATTACAGCAATTTTATTAATTATATCATTA	Root	Metazoa	Arthropoda	Insecta	Hymenoptera	Apidae	Apis	Apis mellifera	62046	0	0	0	0	0	0	0	0	0	0	0	0	0	0	0	0	0	0	0	0	0	0	0	0	0	0	0	0	0	0	0	0	0	0	0	0	0	0	0
ASV402	TTTATCTTTAACTTTAGGTCATAGTGGTGTTGCTGTAGATTTTGCTATTTTTTCTTTACATTTAGCAGGTATTTCTTCAATTATAGGAGCTATTAATTTTATTAGTACTATTTTTAATATACGATGTTTAAATATTAAAATAGATCAAATTTCATTATTAATTTGGTCAGTATTAATCACAGCAGTTTTATTATTATTATCTTTA	Root	Metazoa	Arthropoda	Insecta	Hymenoptera	Braconidae	Aphidius	Aphidius colemani	14467	0	0	0	0	0	0	0	0	0	0	0	0	0	0	0	0	0	0	0	0	0	0	0	0	0	0	0	0	0	0	0	0	0	0	0	0	0	0	0
ASV403	TTTATCATTGACTTTAGGACATAGAGGTGTAGCAGTAGATTTTGCTATTTTTTCATTACATTTAGCAGGTATTTCCTCTATTATAGGAGCTATTAATTTTATTAGTACTATTTTTAATATACGATCTTATAATATTAAAATAGATCAAATTTCATTATTAATTTGATCAGTTTTAATTACTGCTATTTTATTACTATTATCATTA	Root	Metazoa	Arthropoda	Insecta	Hymenoptera	Braconidae	Aphidius	Aphidius ervi/microlophii	103697	0	0	0	0	0	0	0	0	0	0	0	0	0	0	0	0	0	0	0	0	0	0	0	0	3	0	0	0	0	0	0	0	0	0	0	0	0	0	0
ASV404	TTTATCATTAACATTAGGTCATAGAGGTGTAGCAGTTGATTTTGCTATTTTTTCATTACATTTGGCAGGGGTTTCTTCTATTATAGGAGCTATTAATTTTATTAGTACTATTTTTAATATACGATCTTATAATATTAAAATAGATCAAATTTCATTATTAATTTGATCAGTATTAATTACTGCTATTTTGTTATTATTATCATTA	Root	Metazoa	Arthropoda	Insecta	Hymenoptera	Braconidae	Aphidius	Aphidius sonchi	694	0	0	0	0	0	0	0	0	0	0	0	0	0	0	0	0	0	0	0	0	0	0	0	0	0	0	0	0	0	0	0	0	0	0	0	0	0	0	0
ASV405	TTTATCTTTAACTTTGGGCCACAGAGGGGTAGCAGTAGACTTTGCTATTTTTTCTTTACACTTAGCAGGTATTTCTTCTATTATAGGAGCTATTAATTTTATTAGTACTATTTTTAATATACGAACTTATAATATTAAAATAGATCAAATTTCATTGTTGGTATGATCAGTTTTAATTACAGCTATTTTATTATTATTATCTTTA	Root	Metazoa	Arthropoda	Insecta	Hymenoptera	Braconidae	Aphidius	Aphidius sp.	46305	0	0	0	0	0	0	0	0	0	0	1	0	0	1	0	0	0	0	0	0	2	8	0	0	0	0	0	0	0	1	2	0	0	0	0	0	0	91	0
ASV406	TTTATCATCAGGATTAGGTCATGGAGGGGTTTCTGTTGATTTGGCTATTTTTTCTTTACATTTAGCAGGAGTTTCTTCAATTATAGGTGCAATTAATTTTATTACAACAATTTTGAATATAAATTTTTATATAATTAAGTTGGATCAATTGAGTTTATTAGTTTGATCAATTTTTATTACAGCAGTTTTATTATTATTATCTTTA	Root	Metazoa	Arthropoda	Insecta	Hymenoptera	Braconidae	Braconidae sp.	Braconidae sp. 1	1064	0	0	0	0	0	0	0	0	0	0	0	0	0	0	0	0	303	761	0	0	0	0	0	0	0	0	0	0	0	0	0	0	0	0	0	0	0	0	0
ASV407	TTTATCAATATTAATTGGTCATGGAGGAGTTTCTGTAGATATTGCTATTTTTTCTTTACATTTAGCTGGTATTTCTTCTATTATAGGGGCTATAAATTTTATTACAACTATTTATAATATAAATATTAAAGGACTTTTTAAAGAACAGTTAAGATTATTAATTTGGTCTATTAATATTACAGCTATTTTATTATTATTATCTTTA	Root	Metazoa	Arthropoda	Insecta	Hymenoptera	Braconidae	Braconidae sp.	Braconidae sp. 2	283	0	0	0	0	0	0	0	0	0	0	0	0	0	0	0	0	0	0	0	0	0	0	0	0	0	0	0	0	0	0	0	0	0	0	0	0	0	0	0
ASV408	ATTATCTTCAGGATTAGGTCATGGTGGTATTTCAGTTGATTTAGCTATTTTTTCTTTACATTTAGCAGGGGTATCTTCAATTATAGGGGCTATTAATTTTATTACAACAATTTTAAATATAAATTTTTATATAATTAAATTGGATCAATTAAGTTTATTAGTTTGATCAATTTTAATTACTGCAATTTTGTTATTATTATCATTA	Root	Metazoa	Arthropoda	Insecta	Hymenoptera	Braconidae	Braconidae sp.	Braconidae sp. 3	266	0	0	0	0	0	0	0	0	0	0	0	0	0	0	0	0	0	0	0	0	0	0	0	0	0	0	0	0	0	0	0	0	0	0	0	0	0	52	0
ASV409	ATTATCTTTAAATATTGGGCATGGAGGTATTTCAGTTGATTTAGCAATTTTTTCTTTACATTTGGCTGGTATTTCATCAATTATAGGAGCTATTAATTTTATTACAACTATTTTAAATATACGCCCTAATTGATTAAATATAGATAAAATTGCATTATTAGCATGATCAGTATTAATTACTGCAATTTTATTATTACTTTCTTTA	Root	Metazoa	Arthropoda	Insecta	Hymenoptera	Braconidae	Braconidae sp.	Braconidae sp. 4	78	0	0	0	0	0	0	0	0	0	0	0	0	0	0	0	0	0	0	0	0	0	0	0	0	0	0	0	0	0	0	0	0	0	0	0	0	0	0	0
ASV410	ATTATCTTCAGGATTAGGACATGGTGGAGTATCTGTTGATTTAGCTATTTTTTCTTTACATTTAGCAGGAGTATCTTCTATTATAGGTGCTATTAATTTTATTACAACAATTTTAAATATAAATTTTTATATAATTAAGTTAGATCAATTAAGTTTATTAGTTTGATCAATTTTAATTACTGCAATTTTATTATTATTATCATTA	Root	Metazoa	Arthropoda	Insecta	Hymenoptera	Braconidae	Braconidae sp.	Braconidae sp. 5	15	0	0	0	0	0	0	0	0	0	0	0	0	0	0	0	0	0	0	0	0	0	0	0	0	0	0	0	0	0	0	0	0	0	0	0	0	0	0	0
ASV411	TTTATCATTAACTTTAGGACATAGAGGTGTATCAGTAGATTTTGCTATTTTTTCTTTGCATTTAGCGGGTATTTCTTCAATTATAGGAGCTATTAATTTTATTAGAACTATTTTTAATATGCGGTGTTATAATGTTAAAATAGATCAGATTTCTTTATTAATTTGATCAGTTTTAATTACTGCTATTTTATTGTTATTATCTTTA	Root	Metazoa	Arthropoda	Insecta	Hymenoptera	Braconidae	Diaeretiella	Diaeretiella rapae	16196	0	0	0	0	0	0	0	0	0	0	0	0	0	0	0	0	0	0	0	0	0	0	0	0	0	0	0	0	0	0	0	0	0	0	0	1	2	0	0
ASV412	TTTATCTTCTATAATTGGTCATGGTGGAATTTCTGTTGATTTAGCAATTTTTTCATTACATTTAGCTGGTATTTCATCAATTATAGGGGCTATTAATTTTATTACAACTATTTTAAATATAAATTTTATTTCAATAAAATTAGATCAATTAAGGTTATTTATTTGATCAATTTTAATTACAGCAATTTTATTATTATTATCATTA	Root	Metazoa	Arthropoda	Insecta	Hymenoptera	Braconidae	Dinotrema	Dinotrema nr MN676188.1	6	0	0	0	0	0	0	0	0	0	0	0	0	0	0	0	0	0	0	0	0	0	0	0	0	0	0	0	0	0	0	0	0	0	0	0	0	0	0	0
ASV413	ATTATCATTAACTTTAGGTCATAGAGGTGTAGCAGTAGATTTTGCTATTTTTTCTTTACATTTAGCTGGTATTTCATCTATTATAGGAGCAATTAATTTTATTAGTACAATTTTTAATATACGACCTTATAACATTAAAATAGATCAAATTTCTTTATTAGTTTGGTCAGTACTAATTACTGCTGTATTACTATTATTATCTTTA	Root	Metazoa	Arthropoda	Insecta	Hymenoptera	Braconidae	Lysiphlebus	Lysiphlebus testaceipes	5299	0	0	0	0	0	0	0	0	0	0	0	0	0	0	0	0	0	0	0	0	0	0	0	0	0	0	0	0	0	0	0	0	0	0	0	0	0	0	0
ASV414	TTTATCTTCTAATATTGGGCATTTAGGGGTCTCTGTAGATTTAACAATTTATTCTTTACATATAAGGGGGGTCTCTTCAATTTTAGGGTCTATTAATTTTATTACTACAATTTTAAATATACGACCTATTAAAATATCTATAGATAAAGTTACTTTATTTGTTTGATCAATTTTTTTAACAACTATTTTATTATTATTGTCATTA	Root	Metazoa	Arthropoda	Insecta	Hymenoptera	Cynipidae	Cynipidae sp.	Cynipidae sp.	18	0	0	0	0	0	0	0	0	0	0	0	0	0	0	0	0	0	0	0	0	0	0	0	0	0	0	0	0	0	0	0	0	0	0	0	0	0	0	0
ASV415	TTTATCAAGAAAACTTTATCATACAGATTTATCTGTAGATTTTTCTATTTTTTCTTTACATATTGCAGGAATTTCTTCAATTATAGGATCAATTAATTTTTTATCAACAATTATTAATATACGACCTTATATAATAAAAATAATTAATATAACTATATTTAGATGATCAATTTTTTTAACAACAATTTTATTATTATTATCATTA	Root	Metazoa	Arthropoda	Insecta	Hymenoptera	Diapriidae	Diapriidae sp.	Diapriidae sp.	475	0	0	0	0	0	0	0	0	0	0	0	0	0	0	0	0	0	0	0	0	201	274	0	0	0	0	0	0	0	0	0	0	0	0	0	0	0	0	0
ASV416	ATTATCTTCTAATTTAGGTCATTCTGGGATTTCTGTCGATTTAACAATTTTTTCTTTACATATAAGAGGGGTTTCTTCAATTTTAGGGTCTATTAATTTTATTACTACAATTTTAAATATGCGACCTGTAAATTTATCAATAGATAAAATCTCATTATTTATTTGATCTATTTTATTAACAACAATTTTATTATTATTATCATTG	Root	Metazoa	Arthropoda	Insecta	Hymenoptera	Figitidae	Alloxysta	Alloxysta consobrina	119	0	0	0	0	0	0	0	0	0	0	0	0	0	0	0	0	0	0	0	0	0	0	0	0	0	0	0	0	0	0	0	0	0	0	0	0	0	0	0
ASV417	CCTTTCATCAATTACAGGACATCCTTCAATATCAGTTGATTTAGTTATTTATTCTTTACATTTAAGGGGCATCTCATCAATTTTAGGGTCCATTAATTTCATTGCAACTATTATCAACATACGAATAAACCTAATAACAATAGATAAAGTATCATTATTTATCTGATCAATCTTTTTAACTACAATTTTATTGCTATTATCATTA	Root	Metazoa	Arthropoda	Insecta	Hymenoptera	Figitidae	Anacharis	Anacharis zealandica	16317	0	0	0	0	0	0	0	0	0	0	0	0	0	0	0	0	0	0	0	0	0	0	0	0	0	0	0	0	0	0	0	0	0	0	0	0	0	0	0
ASV418	TCTAGCCTCTAACACTTTTCATAGAGGACCTTCTATTGATTTAACTATTTTCTCTCTTCATATTGCAGGTATATCTTCAATTATAGGAGCAATTAATTTTATTTCAACAATCTTAAACATACATAATATTAATATTTCCTTAGATAAAATCCCCCTTTTAGTCTGATCTATCCTTATCACTGCTATTCTTCTATTACTATCTCTG	Root	Metazoa	Arthropoda	Insecta	Hymenoptera	Formicidae	Camponotus	Camponotus claripes	15818	0	0	0	0	0	0	0	0	0	4	3	0	0	0	0	0	0	0	250	238	874	804	342	766	0	0	0	0	1347	1650	8	0	452	232	148	0	0	0	80
ASV419	TTTAGCTTCTAATACTTTCCATAGAGGACCTTCAATTGACCTAACCATTTTCTCTCTCCATATTGCAGGTATATCTTCTATTCTTGGCGCAATTAACTTTATTTCAACAATCTTAAATATACATAATATTAATATCTCTTTAGATAAAATCCCCCTTTTAGTTTGATCAATTCTCATTACTGCTATTCTTCTTCTTTTATCTCTT	Root	Metazoa	Arthropoda	Insecta	Hymenoptera	Formicidae	Camponotus	Camponotus sp. 1	6382	0	0	0	0	0	0	0	0	0	0	0	0	0	0	881	848	0	0	0	0	0	0	0	0	0	0	0	0	0	0	0	0	0	0	0	0	0	0	2700
ASV420	ATTAGCTTCTAATACCTTTCATAGAGGACCTTCTGTTGACCTAACTATTTTTTCCCTTCATATTGCAGGAATATCCTCGATTCTAGGGGCAATTAATTTTATTGCAACAATTTTAAATATACATAATATTAATATTTCCTTAGATAAAATCCCTCTCTTAGTATGATCTATTCTTATTACAGCTATTCTTCTTCTTTTATCCCTA	Root	Metazoa	Arthropoda	Insecta	Hymenoptera	Formicidae	Camponotus	Camponotus sp. 2	183	0	0	0	0	0	0	0	0	0	1	0	0	0	0	0	0	0	0	0	0	8	9	8	12	0	0	0	0	60	76	0	0	0	0	0	0	0	0	0
ASV421	ATTAGCTTCTAATACCTTTCACAGAGGGTCTTCTATTGATTTAACTATTTTTTCTCTTCATATTGCAGGAATATCCTCAATTCTTGGCGCAATCAATTTTATCTCAACAATTTTAAATATACATAATATTAACATTTCTTTAGATAAAATCCCTCTTTTAGTATGACCTATTCTTATTACAGCTATTCTTCTTCTTTTATCTCTC	Root	Metazoa	Arthropoda	Insecta	Hymenoptera	Formicidae	Camponotus	Camponotus sp. 3	78	0	0	0	0	0	0	0	0	0	0	0	0	0	0	0	0	0	0	0	0	12	8	2	11	0	0	0	0	13	22	0	0	0	1	1	0	0	0	0
ASV422	TCTTTCCTCTAATATCTTCCACAGAGGGCCATCAATTGACCTCTCAATCTTCTCTCTTCATATTGCTGGTATATCATCCATTTTAGGGGCCATCAATTTTATCTCAACAATTCTTAATATACATCATAAAAATATTTCTCTAGATAAAATTCCCCTACTTGTTTGATCAATTCTTATTACTGCTATCTTACTCCTCTTATCTCTA	Root	Metazoa	Arthropoda	Insecta	Hymenoptera	Formicidae	Formica	Formica sp.	96	0	0	0	0	0	0	0	0	0	0	0	0	0	0	0	0	0	0	0	0	0	0	0	0	0	0	0	0	0	0	0	0	0	0	0	0	0	0	0
ASV423	TCTTTCCTCTAATATCTTCCACAGAGGACCATCAATTGACCTCTCAATCTTCTCTCTTCATATTGCTGGTATATCATCCATTTTAGGAGCCATCAATTTTATCTCAACAATTCTTAATATACATCATAAAAATATTTCTCTAGATAAAATTCCCCTACTTGTTTGATCAATTCTTATTACTGCTATCTTACTCCTCTTATCTCTA	Root	Metazoa	Arthropoda	Insecta	Hymenoptera	Formicidae	Formicidae sp.	Formicidae sp.	99	0	0	0	0	0	0	0	0	0	0	0	0	0	0	0	0	0	0	0	0	0	0	0	0	0	0	0	0	0	0	0	0	0	0	0	0	0	0	0
ASV424	TTTAGCTTCAAATATATTTCATAATGGACCATCTGTAGATTTAGCTATTTTTTCTCTTCATATTGCAGGAATATCTTCAATTTTAGGAGCAATTAATTTTATTTCTACTATCTTAAATATACACCATAAAAATTTTACTATAGATAAAATTCCTCTATTAGTTTGATCAATTCTAATTACAGCTATTCTATTACTCTTATCTCTA	Root	Metazoa	Arthropoda	Insecta	Hymenoptera	Formicidae	Iridomyrmex	Iridomyrmex anceps	33	0	3	2	0	0	0	0	0	0	0	14	10	0	0	0	0	0	0	0	0	0	0	0	4	0	0	0	0	0	0	0	0	0	0	0	0	0	0	0
ASV425	TCTAGCATCAAATATATTTCATAATGGTCCATCTGTAGATCTAGCTATCTTTTCTCTTCATATTGCAGGAATATCTTCAATTCTAGGAGCAATTAATTTCATCTCTACCATTTTAAATATACACCATAAAAATATTACCATAGATAAAATTCCTTTATTAGTTTGATCAATTTTAATCACTGCTATTTTACTTTTATTATCCTTA	Root	Metazoa	Arthropoda	Insecta	Hymenoptera	Formicidae	Iridomyrmex	Iridomyrmex pallidus	10	0	0	6	0	0	0	0	0	0	0	0	4	0	0	0	0	0	0	0	0	0	0	0	0	0	0	0	0	0	0	0	0	0	0	0	0	0	0	0
ASV426	CCTAGCTTCAAATATATTTCATAATGGCCCTTCTGTAGACTTAGCTATTTTCTCTCTTCATATTGCTGGAATATCTTCAATTCTAGGAGCAATTAATTTTATTTCAACTATTTTAAATATACATCACAAAAATTTCTCTATAGATAAGATTCCATTATTAGTTTGATCAATCTTAATTACTGCTATTCTTTTATTATTAGCTCTT	Root	Metazoa	Arthropoda	Insecta	Hymenoptera	Formicidae	Iridomyrmex	Iridomyrmex sp.	466	0	0	0	0	0	15	7	0	0	0	0	0	0	0	0	0	0	0	0	0	0	0	0	0	0	0	3	388	0	0	0	0	0	0	0	0	0	0	0
ASV427	TTTAGCAGCAAACATATACCATAGCGGACCATCCGTTGATTTAGCCATCTTCTCTTTACACATTGCAGGAATATCTTCTATTTTAGGGGCAATCAATTTTATCTCAACAATTCTAAATATACACCATAAAAATTTTTCTATTGACAAAATCCCTCTTTTAGTTTGATCAATTCTAATTACAGCTGTATTATTGCTTTTATCTTTA	Root	Metazoa	Arthropoda	Insecta	Hymenoptera	Formicidae	Linepithema	Linepithema humile	735	0	13	24	0	4	2	1	0	0	0	21	15	0	0	3	5	0	0	1	0	2	0	12	45	0	0	6	25	120	90	84	54	1	1	3	9	5	0	9
ASV428	ATTAGCATCAAACATTTTTCATAATGGACCATCAGTTGATTTAGCTATTTTTTCATTACATATTGCTGGAATATCCTCAATTTTAGGAGCAATTAATTTTATCTCAACTATCTTAAATATACATCATAAAAATTTTTCAATTGATAAAATCCCCCTTCTCGTTTGATCTATTTTTATCACTGCAATTCTTCTTCTTTTATCATTA	Root	Metazoa	Arthropoda	Insecta	Hymenoptera	Formicidae	Nylanderia	Nylanderia nr obscura	8	0	0	0	0	0	0	0	0	0	0	0	0	0	0	0	0	0	0	0	0	0	0	0	0	0	0	0	0	0	0	0	0	0	0	0	0	0	0	0
ASV429	CTTAGCTAGAAATATATTTCACAATGGACCATCTGTAGATTTAGCTATTTTTTCTTTACATATTGCTGGAATATCATCAATTTTAGGAGCAATTAATTTTATTTCAACTATTCTAAACATACATCATAAAAATTTCTCTATAGATAAAATTCCTCTATTAGTATGATCAATCTTAATTACTGCTGTACTATTACTCTTATCTTTA	Root	Metazoa	Arthropoda	Insecta	Hymenoptera	Formicidae	Ochetellus	Ochetellus glaber	3734	0	0	0	0	0	0	0	0	0	0	20	0	0	0	0	0	2	0	0	0	0	0	0	0	0	0	0	0	0	0	0	0	0	0	0	0	0	0	0
ASV430	CTAGCTTCAAACATTTTTCACAGGGGAGCTTCTATCGATCTCTCAATTTTCTCATTACATATTGCAGGAATATCTTCCATTCTTGGAGCTATTAATTTTATCGCCACAATTATTAATATACATCATAAAAATTTTACTATAGATAAAATTCCCTTATTAGTTTGATCAATTTTAATTACAGCAATCCTTCTTCTTCTCTCCCTA	Root	Metazoa	Arthropoda	Insecta	Hymenoptera	Formicidae	Pheidole	Pheidole megacephala	26	0	11	15	0	0	0	0	0	0	0	0	0	0	0	0	0	0	0	0	0	0	0	0	0	0	0	0	0	0	0	0	0	0	0	0	0	0	0	0
ASV431	TCTAGCATCAAATATTTTTCATAGGGGCCCATCAGTAGACCTAACAATTTTCTCTCTCCATATTGCTGGAATATCCTCAATTCTTGGTGCAATTAATTTTATTTCAACAATTTTAAATATACATAATATTAATATAACTCTTGAAAAAATTCCTTTACTAGTTTGATCAATCCTTATTACTGCTATTCTTTTATTATTATCTCTT	Root	Metazoa	Arthropoda	Insecta	Hymenoptera	Formicidae	Polyrhachis	Polyrhachis sp. 1	1000	0	0	0	0	0	0	0	0	0	0	0	0	0	0	0	0	0	0	0	0	0	0	0	0	0	0	0	0	0	0	0	0	0	0	0	0	0	0	0
ASV432	TTTATCCTCTCTTACTTATCATTCTTCAAATTCTGTTGATTTTACAATTTTTTCATTACATATTGCAGGAGTTTCATCAATTATAGGAGCTATTAATTTTATTGTTTCAATTTTATTAATAAAAAATATTTCACTTAACTTTGATCAAATCCCCTTATTTCCATGGTCAGTAAAAATTACTGCAATCCTATTACTATTATCTTTA	Root	Metazoa	Arthropoda	Insecta	Hymenoptera	Halictidae	Lasioglossum	Lasioglossum cognatum	23	0	0	0	0	0	0	0	0	0	0	0	0	0	0	0	0	0	0	0	0	0	0	0	0	0	0	0	0	0	0	0	0	0	0	0	0	0	0	0
ASV433	ATTATCTTCAATTATATTCCATTCATCTAACTCTGTAGACTTCACAATTTTCTCTCTACATATTGCTGGAATTTCATCAATTATAGGAGCAATTAATTTTATTGTTTCAATTTTATTAATAAAAAATATTTCAATTAATTTTGATCAAATCCCTCTATTTCCATGATCAGTTAAAATTACTGCTATTCTTCTTTTATTATCTTTA	Root	Metazoa	Arthropoda	Insecta	Hymenoptera	Halictidae	Lasioglossum	Lasioglossum pulvitectum	15	0	0	0	0	0	0	0	0	0	0	0	0	0	0	0	0	0	0	0	0	0	0	0	0	0	0	0	0	0	0	0	0	0	0	0	0	0	0	0
ASV434	ATTATCTTTAAATATAAGACATGGGGGTGTTTCTGTTGATTTAGCAATTTTTTCTCTTCATTTAGCAGGAATTTCATCAATTATAGGTGCTATTAATTTTATTACAACTATTTTAAATATACGTCCTAATATATTAACTATAGATAAAATTTCATTATTTAGATGATCTGTATTAATTACTGCAATTTTATTATTATTATCTCTG	Root	Metazoa	Arthropoda	Insecta	Hymenoptera	Hymenoptera sp.	Hymenoptera sp.	Hymenoptera sp. 1	143	0	0	0	0	0	0	0	0	0	0	0	0	0	0	0	0	0	0	0	0	0	0	0	0	0	0	0	0	0	0	0	0	0	0	0	0	0	0	0
ASV435	TTTATCATCAAATTTAGGTCAAATAGGAGCTTCTATAGATTTTGCAATTTTTTCTCTTCATATTGCTGGTATATCATCTATTATAGGAGCAATTAATTTTATTTCTACTATTATAAACATATATAATAAAGAAATAAAAATTTACAATTTAAATTTATTTTCATGATCAGTATTAATTACTGCTATTTTATTATTATTATCTTTA	Root	Metazoa	Arthropoda	Insecta	Hymenoptera	Hymenoptera sp.	Hymenoptera sp.	Hymenoptera sp. 2	38	0	0	0	0	0	0	0	0	0	0	0	0	0	0	0	0	0	0	0	0	0	0	0	0	0	0	0	0	0	0	0	0	0	0	0	0	0	0	0
ASV436	TTTATCCTTAAATAATAGACATAGAGGAATATCAGTAGATTTAGCTATTTTTTCTCTCCATTTAGCTGGTATATCATCAATTATAGGAGCAATTAATTTTATTACAACTATTTTAAATATATATCCTTTAAATACTAAATTTGAACAATTAACCTTATTTACTTGATCAATTTTAATTACAACTATTCTTTTACTTTTAGCAGTT	Root	Metazoa	Arthropoda	Insecta	Hymenoptera	Ichneumonidae	Anacis	Anacis sp.	2245	0	0	0	0	0	0	0	0	0	0	0	0	0	0	1135	1110	0	0	0	0	0	0	0	0	0	0	0	0	0	0	0	0	0	0	0	0	0	0	0
ASV437	ATTATCTTTAAATATTAATCATGAAGGTATATCTATTGATTTAGCTATTTTTTCATTACATATTGCAGGAATGTCATCTATTATAGGTTCAATTAATTTTATTTCAACAATTTTAATTATAAAAAATTCTAATATAAAACTTGAACAACTAACTTTATTCACCTGATCAATTTTAATTACAACAATTCTTTTATTACTTGCAGTA	Root	Metazoa	Arthropoda	Insecta	Hymenoptera	Ichneumonidae	Campoplex	Campoplex sp. 1	5324	0	0	0	0	0	0	0	0	0	0	0	0	0	0	0	0	0	0	0	0	0	0	0	0	0	0	0	0	0	0	0	0	0	0	0	0	0	0	0
ASV438	TTTATCTTCTAATTTAAATCATGAAGGAATATCTGTTGATTTAGCTATTTTTTCATTACATTTAGCAGGTATATCATCTATTATAGGAGCAATTAATTTTATTTCAACAATTATAAATATACGCCCTAATAATGTAACATTAGAAAAAATATCATTATTTTCATGATCAATTAAAATTACTACAATTTTATTATTATTAGCAGTT	Root	Metazoa	Arthropoda	Insecta	Hymenoptera	Ichneumonidae	Diplazon	Diplazon laetatorius	92	0	0	0	0	0	0	0	0	0	0	0	0	0	0	0	0	0	0	0	0	0	0	0	0	0	0	0	0	0	0	0	0	0	0	0	0	0	0	0
ASV439	TCTTTCATTAAATTTAAATCATGAAGGTATATCAGTTGATATATCTATTTTTTCTTTACATCTAGCAGGTATATCTTCAATTATAGGAGCAATTAATTTTATTAGCACTATTATAAATATAATACCTATAAATATAAAACTTGAACAAATAACTTTATTTACATGATCAATTTTAATTACTACTATTTTATTACTTTTAGCTGTA	Root	Metazoa	Arthropoda	Insecta	Hymenoptera	Ichneumonidae	Ichneumonidae sp.	Ichneumonidae sp. 1	2685	0	0	0	0	0	0	0	1235	1450	0	0	0	0	0	0	0	0	0	0	0	0	0	0	0	0	0	0	0	0	0	0	0	0	0	0	0	0	0	0
ASV440	TCTATCTTCAAATTTAAATCATGAAGGAATATCTTTAGACTTAGCTATTTTTTCTTTACATCTTGCTGGTATATCTTCAATTATAGGAGCAATTAATTTTATTACTACTATTATTAATATACGACCTAATACTATAACATTAGAAAAAATATCTTTATTTTCATGATCAATTTTAATTACTGCAATTTTATTATTATTGGCCGTA	Root	Metazoa	Arthropoda	Insecta	Hymenoptera	Ichneumonidae	Ichneumonidae sp.	Ichneumonidae sp. 2	119	0	0	0	0	0	0	0	0	0	0	0	0	0	0	0	0	0	0	0	0	0	0	0	0	0	0	0	0	0	0	0	0	0	0	0	0	0	0	0
ASV441	ATTATCTTTAAATTTAAATCATGAAGGTATATCAATTGATTTAGCAATTTTTTCATTACATTTAGCTGGTATATCTTCAATTATAGGAGCAATTAATTTTATTACTACAATTCTAAATATACGTCCTAATTATATAAAATTAGATAAAATTACATTATTTACATGATCAATTATAATTACAACAATTTTATTATTATTAGCTGTT	Root	Metazoa	Arthropoda	Insecta	Hymenoptera	Ichneumonidae	Plectiscus	Plectiscus sp. KY447245.1	118	0	0	0	0	0	0	0	0	0	0	0	0	0	0	0	0	0	0	0	0	0	0	0	0	74	44	0	0	0	0	0	0	0	0	0	0	0	0	0
ASV442	ATTATCTTTAAATTTAAATCATGAAGGTATATCAATTGATTTGGCAATTTTTTCATTACATTTAGCTGGTATATCTTCAATTATAGGAGCAATTAATTTTATTACTACAATTCTAAATATACGACCTAATTATATAAGATTGGATAAAATTACATTATTTACATGATCAATTATAATCACAACAATTTTATTATTGTTAGCTGTT	Root	Metazoa	Arthropoda	Insecta	Hymenoptera	Ichneumonidae	Plectiscus	Plectiscus sp. KY447249.1	54	0	0	0	0	0	0	0	0	0	0	0	0	0	0	0	0	0	0	0	0	0	0	0	0	27	27	0	0	0	0	0	0	0	0	0	0	0	0	0
ASV443	TTTATCAAGAAATATTTCTCACTCTGGATCATCTGTAGATTTAACAATTTTTTCACTTCATATAGCAGGAATTTCATCAATTTTAGGAGCCATTAACTTTATTTCAACAGTAATTAATATACGAACAAAAGGAATAAGTTTAGATAAAATACCACTTATAATTTGAGCAATTACAATTACAGCTATTTTACTTGTTATTTCTTTA	Root	Metazoa	Arthropoda	Insecta	Hymenoptera	Pergidae	Lophyrotoma	Lophyrotoma zonalis	20	0	2	0	0	0	0	0	0	0	0	0	0	0	0	0	0	0	0	0	0	0	0	0	15	0	0	0	0	0	0	0	0	0	0	0	0	0	0	0
ASV444	TCTTTCATCAAATATTGCTCATGGGGGAGCATCAGTTGATTTAGCTATTTTTAGTTTACATCTTGCAGGAATTTCATCAATTTTAGGCGCTGTTAATTTCATTACTACAGTAATTAATATACGACCTCAAGGAATATCTTTTGACCGAATACCTTTATTTGTTTGAGCTGTTGTTATTACCGCTGTTTTACTTCTTTTATCACTC	Root	Metazoa	Arthropoda	Insecta	Insecta sp.	Insecta sp.	Insecta sp.	Insecta sp. 1	35693	0	0	0	0	0	0	0	0	0	0	0	0	0	0	0	0	0	0	0	0	0	0	0	0	0	0	0	0	0	0	0	0	0	0	0	0	0	0	0
ASV445	ATTATCATCTAATATTGCACACTCTGGCCCAAGAGTTGATTTAGCTATCTTTTCACTTCACTTAGCAGGAATTTCATCAATTCTTGGAGCAGTAAATTTTATTACTACAGTGATAAATATACGAGCTGTAGGGATAAATTTAGATCAAACACCACTATTTGTATGATCAGTCTTAATTACAGCAATTCTTCTTCTTTTATCACTT	Root	Metazoa	Arthropoda	Insecta	Insecta sp.	Insecta sp.	Insecta sp.	Insecta sp. 2	14471	0	0	0	0	0	0	0	0	0	0	0	0	0	0	0	0	0	0	0	0	0	0	0	0	0	0	0	0	0	0	0	0	0	0	0	0	0	0	0
ASV446	ATTATCAAGAAATATTGCCCATGGAGGTTCATCAGTAGACTTAGCTATTTTTAGCCTACATTTGGCAGGAATTTCCTCAATTTTAGGAGCTGTAAATTTCATTACAACTGTAATTAATATACGACCTGCTGGAATAAGATTGGATCAAATACCTCTTTTTGTTTGATCTGTAGTAATTACAGCAATTCTCTTATTATTATCTTTA	Root	Metazoa	Arthropoda	Insecta	Insecta sp.	Insecta sp.	Insecta sp.	Insecta sp. 3	5057	4	0	0	0	0	0	0	0	0	2	0	0	0	0	0	0	0	0	0	0	0	0	0	0	0	0	0	0	0	0	0	0	0	0	0	0	0	0	0
ASV447	ACTGTCATCAAATATTGCCCATGGTGGGTCTTCTGTTGATTTAGCCATTTTTAGACTTCATTTAGCAGGAATCTCTTCAATTTTAGGAGCAGTAAATTTTATTTCTACTGTCATTAATATACGAACAGTAGGCATTTCATTTGACCGAATACCCCTTTTTGTTTGATCCGTAGCTATTACAGCTTTATTACTTTTACTATCATTA	Root	Metazoa	Arthropoda	Insecta	Insecta sp.	Insecta sp.	Insecta sp.	Insecta sp. 4	2947	0	0	0	0	0	0	0	0	0	0	0	0	0	0	0	0	0	0	0	0	0	0	0	0	0	0	0	0	0	0	0	0	0	0	0	0	0	8	0
ASV448	ACTATCAGCTAATATTGCTCATTCAGGGGCAAGAGTTGATTTAGCAATTTTTTCTTTACATTTAGCAGGTATTTCATCAATTCTTGGGGCAGTAAATTTTATTACAACAGTAATTAATATACGATCTAAAAACTTAACTTTAGATCGAATTCCATTATTTGTATGATCAGTAGTCATTACTGCAGTTTTACTGTTACTTTCTTTA	Root	Metazoa	Arthropoda	Insecta	Insecta sp.	Insecta sp.	Insecta sp.	Insecta sp. 5	340	0	0	0	0	0	0	0	0	0	0	0	0	0	0	0	0	0	0	0	0	0	0	0	0	0	0	0	0	0	0	0	0	0	0	0	0	0	0	0
ASV449	TCTCTCAGCCGGAATTGCACACAGAGGAGCTTCAGTAGATTTAGCCATTTTTAGACTTCATTTGGCCGGAATTTCTTCTATTTTGGGGGCAGTAAATTTCATTTCCACAGTTATTAATATACGATCAACAGGAATAACATTCGACCGAATGCCATTATTTGTTTGAGCAGTAGCAATCACGGCTCTACTTCTATTACTTTCTTTG	Root	Metazoa	Arthropoda	Insecta	Insecta sp.	Insecta sp.	Insecta sp.	Insecta sp. 6	166	0	17	5	0	0	5	3	0	0	0	40	11	0	0	11	8	9	16	0	0	0	0	7	20	0	0	0	0	0	12	0	0	0	0	0	0	0	0	0
ASV450	ACTCTCTTCTAATATTGCTCATGGAGGAGCTTCAGTAGATTTAGCAATCTTTAGACTCCACTTAGCTGGGATTTCATCTATTTTAGGAGCTGTAAATTTTATTACTACTGTTATTAATATACGATCTCCCGGAATAACTTATGAACGAATGCCTTTATTTGTTTGGTCAGTTGCTATTACAGCTTTATTATTACTCTTATCTCTC	Root	Metazoa	Arthropoda	Insecta	Insecta sp.	Insecta sp.	Insecta sp.	Insecta sp. 7	120	0	0	0	0	0	0	0	0	0	0	0	0	0	0	0	0	0	0	0	0	0	0	0	0	0	0	0	0	0	0	0	0	0	0	0	0	0	0	0
ASV451	ACTTTCATCTAATATTGCTCATGGAGGTAGTTCTGTTGATTTAGCTATTTTTTCTTTACATTTAGCTGGAATTTCATCAATTTTAGGAGCTATTAATTTTATTACAACAATTATTAATATACGACCTAATAATATATTTTTTGATCAAATACCTTTATTTGTTTGAGCTGTAGGTATTACTGCTTTACTTCTTCTTTTATCTCTT	Root	Metazoa	Arthropoda	Insecta	Lepidoptera	Blastobasidae	Neoblastobasis	Neoblastobasis nr eurotella	15	0	0	0	0	0	0	0	0	0	0	0	0	0	0	0	0	0	0	0	0	0	0	0	0	0	0	0	0	0	0	0	0	0	0	0	0	0	0	0
ASV452	TTTATCTTCCAACATTGCCCATGGAGGAAGTTCCGTAGATTTAGCAATTTTTTCATTACATTTAGCTGGAATTTCTTCTATTTTAGGAGCAATTAATTTCATTACAACAATCATTAATATACGTATTAATAGTATATCCTTCGATCAAATACCTTTATTTGTGTGAGCAGTAGGAATTACAGCTTTACTTCTCTTACTTTCTTTA	Root	Metazoa	Arthropoda	Insecta	Lepidoptera	Cosmopterigidae	Macrobathra	Macrobathra sp.	344	0	0	0	0	0	0	0	0	0	0	0	0	0	0	0	0	0	0	0	0	0	0	0	0	0	0	0	0	0	0	0	0	0	0	0	0	0	0	0
ASV453	ATTATCATCAAATATTGCTCACGGAGGAAGATCTGTAGATTTAGCTATTTTTTCTCTACATTTAGCAGGAATTTCCTCAATTTTAGGAGCTATTAATTTTATTACTACAATTATTAATATAAAAATTAATGGATTATCATTTGATCAAATATCACTATTTATTTGATCAGTAGGTATCACAGCATTACTCTTATTACTTTCATTA	Root	Metazoa	Arthropoda	Insecta	Lepidoptera	Crambidae	Calamotropha	Calamotropha leptogrammellus	1408	0	0	0	0	0	0	0	0	0	0	0	0	0	0	0	0	0	0	0	0	0	0	0	0	0	0	0	0	0	0	0	0	0	0	0	0	0	0	0
ASV454	ACTATCTTCTAATATTGCTCATGGAGGAAGATCTGTCGATTTAGCTATTTTTTCTTTACACTTAGCAGGTATTTCCTCAATTTTAGGAGCTATTAACTTTATTACTACAATCATTAATATACGAATTAATAGTCTATCATTTGATCAAATACCTCTATTTGTTTGAGCTGTTGGTATTACAGCTTTATTACTGTTATTATCTTTA	Root	Metazoa	Arthropoda	Insecta	Lepidoptera	Crambidae	Crambidae sp.	Crambidae sp. 1	6993	0	0	0	0	0	0	0	0	0	0	0	0	0	0	3432	3561	0	0	0	0	0	0	0	0	0	0	0	0	0	0	0	0	0	0	0	0	0	0	0
ASV455	TCTCTCATCTAATATTGCTCATAGTGGAAGATCTGTTGATCTCACAATTTTTAGACTACATTTAGCTGGAATTTCATCTATTTTAGGAGCAGTTAATTTTATTACTACCGTAATTAATATACGAACAATAAATTTAAAATATGATCAAATACCCCTTTTTATTTGAGCTGTAAGAATTACTGCTTTATTATTACTTCTTTCTCTT	Root	Metazoa	Arthropoda	Insecta	Lepidoptera	Crambidae	Crambidae sp.	Crambidae sp. 2	262	0	0	0	0	0	0	0	0	0	0	0	0	0	0	0	0	0	0	0	0	0	0	0	0	0	0	0	0	0	0	0	0	0	0	0	0	0	0	0
ASV456	TTTATCTTCTAATATTGCTCATGGAGGAAGATCAGTTGATTTAGCTATTTTTTCTTTACATCTTGCTGGAATTTCTTCAATTTTAGGTGCTGTAAATTTTATTACAACAATTATTAATATACGAATTAATGGAATATCATTTGATAAAATATCCTTATTTATCTGAGCAGTGGGAATTACTGCTCTTCTTTTATTATTATCTCTC	Root	Metazoa	Arthropoda	Insecta	Lepidoptera	Crambidae	Crambidae sp.	Crambidae sp. 3	193	0	0	0	0	0	0	0	0	0	0	0	0	0	0	0	0	0	0	0	0	0	0	0	0	0	0	0	0	0	0	0	0	0	0	0	0	0	0	0
ASV457	ACTTTCATCCAATATTGCTCATAGAGGAAGATCTGTAGACTTAGCTATTTTTTCTCTCCATTTAGCAGGTATTTCTTCAATTTTAGGAGCAATTAATTTTATTACAACAATTATTAATATACGTCTTAATAATTTAATATTTGATCAAATACCATTATTTGTATGAGCTGTTGGTATTACAGCATTATTATTGTTATTATCTTTA	Root	Metazoa	Arthropoda	Insecta	Lepidoptera	Elachistidae	Elachista	Elachista synethes	169	0	0	0	0	0	0	0	0	0	0	0	0	0	0	0	0	0	0	0	0	0	0	0	0	0	0	0	0	0	0	0	0	0	0	0	0	0	0	0
ASV458	ACTTTCATCTAATATTGCTCATGGAGGAAGTTCAGTTGATTTAGCTATTTTTTCCCTTCATCTAGCTGGAATTTCCTCTATTTTAGGAGCAATTAATTTTATTACTACAATCATTAATATACGACTTAGAAATATATCATTTGATCAAATACCTTTATTTGTTTGAGCTGTTGGTATTACTGCTCTTTTATTACTTTTATCTTTA	Root	Metazoa	Arthropoda	Insecta	Lepidoptera	Epermeniidae	Notodryas	Notodryas sp.	9418	0	0	0	0	0	0	0	0	0	0	0	0	0	0	0	0	0	0	0	0	0	0	0	0	0	0	0	0	0	0	0	0	0	0	0	0	0	0	0
ASV459	TCTTTCATCTAATATTGCTCATGGAGGAAGATCAGTTGATTTAGCAATTTTTTCATTACATTTAGCGGGTATTTCCTCTATTTTAGGGGCAATTAATTTTATCACGACAATCATTAATATACGTCTTAGAAATATGTCTTTTGATCAAATACCTTTATTCGTTTGAGCTGTTGGTATTACTGCTCTTTTACTACTTCTTTCCTTA	Root	Metazoa	Arthropoda	Insecta	Lepidoptera	Epermeniidae	Notodryas	Notodryas sp. nr KF405599.1	220	0	0	0	0	0	0	0	0	0	0	0	0	0	0	0	0	0	0	0	0	0	0	0	0	0	0	0	0	0	0	0	0	0	0	0	0	0	0	0
ASV460	CCTTTCTTCCAATATTGCTCATGGTGGAAGTTCAGTAGATTTAGCTATTTTTTCCCTTCATTTAGCAGGAATTTCATCAATTTTAGGAGCTATTAATTTTATTACAACCATTATTAATATACGACTTTATAATTTATCATTTGATCAAATACCTTTATTTGTTTGAGCAGTAGGAATTACAGCCTTATTACTTCTTCTCTCTTTA	Root	Metazoa	Arthropoda	Insecta	Lepidoptera	Gelechiidae	Anaptilora	Anaptilora ephelotis/homoclera	46	0	0	0	0	0	0	0	0	0	0	0	0	0	0	0	0	0	0	0	0	0	0	0	0	0	0	0	0	0	0	0	0	0	0	0	0	0	0	0
ASV461	TTTATCATCTAATATCGCCCACGGAGGAAGATCAGTGGATTTAGCAATTTTTTCCCTACATTTAGCGGGTATTTCATCAATTTTAGGAGCTATTAATTTTATTACTACTATTATTAACATACGAATTAATGGATTATCATTTGATCAAATACCTCTTTTTGTTTGGGCAGTTGGAATTACAGCTCTTCTTCTTTTATTATCTTTA	Root	Metazoa	Arthropoda	Insecta	Lepidoptera	Gelechiidae	Ephysteris	Ephysteris subdiminutella	981	0	0	0	0	0	0	0	0	0	0	0	0	65	146	0	0	0	0	0	0	0	0	0	0	0	0	0	0	2	0	0	0	0	0	0	0	0	0	0
ASV462	CCTTTCATCTAATATTGCTCATAGAGGAAGATCAGTTGATTTAGCTATTTTTTCTCTTCATCTAGCTGGAATTTCTTCAATTTTAGGAGCTATTAATTTTATTACTACAATTATTAATATAAAAATTAATAACATAAATTTTGATCAAATACCTTTATTTGTATGAGCAGTAGGAATTACCGCTTTATTACTTCTCCTCTCTTTA	Root	Metazoa	Arthropoda	Insecta	Lepidoptera	Gelechiidae	Epiphthora	Epiphthora thyellias	145	0	0	0	0	0	0	0	0	0	0	0	0	0	0	0	0	0	0	0	0	0	0	0	0	0	0	0	0	0	0	0	0	0	0	0	0	0	0	0
ASV463	ATTATCTTCTAATATTGCCCATGGAGGAAGATCTGTTGATTTAGCTATTTTTTCTTTACACTTAGCAGGTATTTCTTCAATTTTAGGAGCTATTAATTTTATTACTACAATTATTAATATACGAATTAATAGTTTATCTTTTGATCAAATACCTTTATTTGTTTGAGCTGTTGGTATTACAGCCTTATTACTTTTACTATCTTTA	Root	Metazoa	Arthropoda	Insecta	Lepidoptera	Gelechiidae	Keiferia	Keiferia sp.	603	0	0	0	0	0	0	0	0	0	0	0	0	0	0	0	0	0	0	0	0	0	0	0	0	0	0	0	0	2	0	0	0	0	0	0	0	0	0	0
ASV464	TCTTTCATCTAATATTGCTCATGGAGGAAGCTCTGTAGATTTAGCTATTTTTTCTTTACATTTAGCAGGAATTTCTTCAATTTTAGGGGCAATTAATTTTATTACAACTATTTTTAATATACGATTAAATAATATATTATTTGATCAATTACCTTTATTTGTATGAGCGGTAGGAATTACAGCTCTCCTTTTATTACTTTCTCTA	Root	Metazoa	Arthropoda	Insecta	Lepidoptera	Geometridae	Chloroclystis	Chloroclystis insigillata	2	0	0	0	0	0	0	0	0	0	0	0	0	0	0	0	0	0	0	0	0	0	0	0	0	0	0	0	0	0	0	0	0	0	0	0	0	0	0	0
ASV465	CCTTTCATCCAATATTGCTCACGGAGGAGGTTCTGTAGACTTAGCTATTTTTTCTTTACATTTAGCTGGAATTTCTTCTATTTTAGGAGCAGCTAATTTTATTACTACCATAATTAATATACGACCTAATAATATATCATTTGATAAAATACCTTTATTTGTGTGATCGGTTGCAATTACTGCTTTACTTTTATTATTATCATTA	Root	Metazoa	Arthropoda	Insecta	Lepidoptera	Lepidoptera sp.	Lepidoptera sp.	Lepidoptera sp. 1	45	0	0	0	0	0	0	0	0	0	0	0	0	0	0	0	0	0	0	0	0	0	0	0	0	0	0	0	0	0	0	0	0	0	0	0	0	0	0	0
ASV466	ACTTTCATCTAATATCGCCCATGGAGGAAGCTCAGTAGATTTAGCAATTTTTTCCCTTCATTTAGCCGGAATTTCATCAATTTTAGGAGCAATTAATTTTATTACCACTATTATTAATATACGAATTAATGGCCTATCTTTTGACCAAATACCTTTATTTATTTGAGCCGTAGGTATTACTGCCTTACTTCTTCTCCTTTCTTTA	Root	Metazoa	Arthropoda	Insecta	Lepidoptera	Lepidoptera sp.	Lepidoptera sp.	Lepidoptera sp. 2	12	0	0	0	0	0	0	0	0	0	0	0	0	0	0	0	0	0	0	0	0	0	0	0	0	0	0	0	0	0	0	0	0	0	0	0	0	0	0	0
ASV467	ATTATCTTCAAATATTGCCCATAGTGGAAGATCAGTTGATTTAGCCATTTTTTCTTTACATTTAGCGGGAATTTCCTCTATTTTAGGGGCCATTAACTTTATCACCACAATTATTAATATAAAAAATATTAACATATCTTTTGATCAAATACCTTTATTTGTGTGAGCTGTAGGAATTACAGCTTTATTACTTCTCCTATCATTA	Root	Metazoa	Arthropoda	Insecta	Lepidoptera	Lyonetiidae	Bedellia	Bedellia sp. GU695564.1	28	0	0	0	0	0	0	0	0	0	28	0	0	0	0	0	0	0	0	0	0	0	0	0	0	0	0	0	0	0	0	0	0	0	0	0	0	0	0	0
ASV468	ACTTTCATCAAATATTGCTCATGGAGGTAGATCTGTAGATTTAGCTATTTTTTCTTTACATTTAGCTGGAATTTCTTCTATTTTAGGTGCTATTAATTTTATTACTACAATTATCAATATACGATTAAATAATTTATCATTCGATCAAATACCTTTATTTATTTGAGCTGTTGGAATTACTGCATTTTTATTACTATTATCTTTA	Root	Metazoa	Arthropoda	Insecta	Lepidoptera	Noctuidae	Mythimna	Mythimna convecta	7	0	0	0	0	0	0	0	0	0	0	0	0	0	0	0	0	0	0	0	0	0	0	0	0	0	0	0	0	0	0	0	0	0	0	0	0	0	0	0
ASV469	ACTTTCATCTAATATTGCCCATGGAGGTAGATCAGTTGATTTAGCTATTTTTTCCTTACATTTAGCTGGAATTTCATCAATTTTAGGAGCAATTAATTTTATTACAACAATTATTAATATACGACTTAATAATATATCATTTGATCAAATACCTTTATTTGTTTGAGCTGTAGGAATTACAGCTTTATTACTTCTTTTATCCTTA	Root	Metazoa	Arthropoda	Insecta	Lepidoptera	Oecophoridae	Artiastis	Artiastis heliacma	5081	0	0	0	0	0	0	0	0	0	0	0	0	0	0	0	0	0	0	0	0	0	0	0	0	0	0	0	0	3	13	0	0	0	0	0	0	0	0	0
ASV470	TTTATCTTCTAATATTGCTCATGGAGGCAGATCTGTTGACTTAGCTATTTTTTCTTTGCATTTAGCTGGTATTTCTTCTATTTTAGGGGCAATTAATTTTATCACAACAATTATTAATATACGTTTAGGAAATATATCATTTGATCAAATACCTTTATTTGTTTGAGCTGTTGGAATTACAGCTCTTCTTTTACTTTTATCTTTA	Root	Metazoa	Arthropoda	Insecta	Lepidoptera	Oecophoridae	Eulechria	Eulechria marmorata	8	0	0	0	0	0	0	0	0	0	0	0	0	0	0	0	0	0	0	0	0	0	0	0	0	0	0	0	0	0	0	0	3	0	0	0	0	0	0	0
ASV471	CTATCCTCTAATATCGCCCATAGAGGAAGATCTGTCGATTTAGCTATTTTTTCCCTTCATTTAGCTGGTATTTCTTCAATTCTAGGAGCAATTAATTTTATTACAACTATTATTAATATAAAAAGAAATGGTATGTCATTTGATCGAATACCTTTATTTGTTTGAGCTGTAGGAATTACCGCTGTTTTATTATTATTATCCTTA	Root	Metazoa	Arthropoda	Insecta	Lepidoptera	Plutellidae	Plutella	Plutella australiana	11	0	0	0	0	0	0	0	0	0	0	0	0	0	0	0	0	0	0	0	0	0	0	0	0	0	0	0	0	0	0	0	0	0	0	0	0	0	0	0
ASV472	TCTTTCATCTAATATTGCTCATAGAGGCTCCTCTGTAGATTTAGCTATTTTTTCATTACATTTAGCTGGTATTTCTTCAATTTTAGGGGCAATTAATTTTATCACTACAATTATTAATATACGAATTAATAATTTAACTTTTGATCAAATACCATTATTTATTTGAGCTGTTGGAATTACAGCTCTTTTACTTCTTCTTTCATTA	Root	Metazoa	Arthropoda	Insecta	Lepidoptera	Scythrididae	Scythris	Scythris sp. KF403736.1	7100	0	0	0	0	0	0	0	0	0	0	0	0	0	0	0	0	0	0	0	0	0	0	0	0	0	0	0	0	0	0	0	0	0	0	0	0	0	0	0
ASV473	ACTTTCATCTAATATTGCCCATGGAGGTGCTTCCGTAGATTTAGCTATTTTCTCCTTACATTTAGCAGGAATTTCATCTATTCTTGGAGCTATTAATTTTATTACTACTATAATTAATATAAAACCTCAAGGAATAAAATTCGATCAATTACCTTTATTTGTTTGAGCTGTAAGAATTACTGCTCTTCTACTTTTATTATCACTT	Root	Metazoa	Arthropoda	Insecta	Lepidoptera	Tineidae	Monopis	Monopis ethelella	394	0	0	0	0	0	201	193	0	0	0	0	0	0	0	0	0	0	0	0	0	0	0	0	0	0	0	0	0	0	0	0	0	0	0	0	0	0	0	0
ASV474	CCTTTCATCTAATATTGCTCATGGAGGAGCTTCTGTAGATCTAGCTATTTTTTCACTTCATTTAGCTGGAATTTCCTCAATTCTAGGGGCCATTAACTTTATTACTACAATAATTAACATAAAACCCCAAGGAATAAAATTTGACCAACTTCCTTTATTTGTTTGAGCTGTTAGAATTACTGCTCTTCTTTTATTACTGTCTCTT	Root	Metazoa	Arthropoda	Insecta	Lepidoptera	Tineidae	Monopis	Monopis ochroptila	144	0	0	0	0	0	0	0	0	0	0	0	0	0	0	0	0	0	0	0	0	0	0	0	0	0	0	0	0	0	0	0	0	0	0	0	0	0	0	0
ASV475	TTTATCCTCAAATATTGCTCACGGAGGTGGTTCTGTAGATTTAGCTATTTTTTCTTTACATTTAGCTGGAATTTCTTCAATTTTAGGAGCTGCTAATTTTATTACTACAACAATTAATATACGACCTAATAATATATCATTTGATAAAATACCTTTATTCGTATGATCAGTAGCTATTACTGCATTATTATTATTATTATCTTTA	Root	Metazoa	Arthropoda	Insecta	Lepidoptera	Tineidae	Opogona	Opogona glycyphaga	24	0	0	0	0	0	0	0	0	0	0	0	0	0	0	0	0	0	0	0	0	0	0	0	0	0	0	0	0	0	0	0	0	0	0	0	0	0	0	0
ASV476	ACTATCATCGAATATTGCCCATGGAGGTGGATCTGTAGACTTAGCTATTTTCTCTTTACACTTAGCAGGTATTTCTTCAATTTTAGGAGCCGCTAATTTTATTACAACAACAATCAATATACGACCAAATAATATATCATTCGATAAAATACCATTATTTGTATGATCTGTGGCAATTACAGCTTTACTTCTTTTACTTTCATTA	Root	Metazoa	Arthropoda	Insecta	Lepidoptera	Tineidae	Opogona	Opogona omoscopa/sacchari	6	0	0	0	0	0	0	0	0	0	0	0	0	0	0	0	0	0	0	0	0	0	0	0	0	0	0	0	0	0	0	0	0	0	0	0	0	0	0	0
ASV477	ACTTTCATCAAATATTGCCCATAGTGGAAGTTCAGTAGATTTAGCAATTTTTTCTTTACATTTAGCAGGAATTTCTTCTATTTTAGGTGCTGTAAATTTTATTACAACTATTATTAATATACGCCCTAATAACATATCTTTAGATCAAATACCATTATTTGTTTGATCTGTGGGAATTACAGCCTTATTATTATTATTATCATTA	Root	Metazoa	Arthropoda	Insecta	Lepidoptera	Tortricidae	Capua	Capua sp. KF399658.1	172	0	0	0	0	0	0	0	0	0	0	0	0	0	0	0	0	0	0	0	0	0	0	0	0	0	0	0	0	0	0	0	0	0	0	0	0	0	0	0
ASV478	ACTTTCATCTAATATTGCCCATAGAGGTAGTTCTGTAGACTTAGCTATTTTTTCACTACATTTAGCAGGTATTTCATCAATTTTAGGAGCTGTTAATTTTATTACAACAATTATTAACATACGACCAAATAATATATCATTAGACCAAATACCTTTATTTGTTTGAGCTGTCGGTATTACAGCTCTTTTATTATTACTTTCTCTA	Root	Metazoa	Arthropoda	Insecta	Lepidoptera	Tortricidae	Strepsicrates	Strepsicrates macropetana	48908	0	0	0	0	0	0	0	0	0	0	0	0	0	0	0	0	0	0	0	0	0	0	0	0	0	0	0	0	0	0	0	0	0	0	0	0	0	0	0
ASV479	TTTATCTTCTAGAATTGCTCATGCTGGTGCTTCTGTAGACTTAGCTATTTTTAGATTACATTTAGCTGGAATTTCATCTATTTTAGGTGCTGTAAATTTCATTACAACTGTTATTAATATACGATTAAATTATATAACTTTAGATCGAATACCTTTATTTGTTTGATCAGTAGTAATTACAGCTTTATTACTTTTATTATCTTTA	Root	Metazoa	Arthropoda	Insecta	Neuroptera	Chrysopidae	Mallada	Mallada signatus	9	0	0	0	0	0	0	0	0	0	0	0	0	0	0	0	0	0	0	0	0	0	0	0	0	0	0	0	0	0	0	0	0	0	0	0	0	0	0	0
ASV480	CCTTTCATCAAGATTAGCTCACGCAGGAGCATCTGTAGATTTAGCTATTTTCAGACTACACCTAGCAGGAGTATCATCAATTTTAGGTGCTGTAAATTTTATTACAACTGTAATTAATATACGATTATCTTATATAACTTTAGACCGAATACCTTTATTTGTTTGATCTGTAGTTATTACAGCCTTACTTTTACTTTTATCTTTA	Root	Metazoa	Arthropoda	Insecta	Neuroptera	Hemerobiidae	Micromus	Micromus tasmaniae	57175	0	0	0	0	0	0	0	0	0	0	0	0	0	0	0	0	0	0	0	0	2	0	0	0	2295	2663	0	0	0	0	0	0	0	0	0	0	0	0	0
ASV481	TTTATCTTTAAATGTTAGACATAGAGGTATTTCTGTTGATATAAGAATTTTTTCTTTACACATAGCAGGGATTTCTTCTATTATAGGAGCAGTAAATTTTATTTCAACAATTTTTAATATACATTTAATGGGTTTAATAATAAATAATATTTCTTTATTTGTTTGATCTGTAATAATTACTGCAGTTTTATTATTGTTATCATTA	Root	Metazoa	Arthropoda	Insecta	Orthoptera	Tetrigidae	Tetrigidae sp.	Tetrigidae sp.	590	0	0	0	0	0	0	0	0	0	0	0	0	0	0	0	0	0	0	0	0	0	0	0	0	0	0	0	0	0	0	0	0	0	0	0	0	0	0	0
ASV482	ACTTTCAAGAGTTATTGCACATACAGGAGCATCTGTTGATTTAGCTATTTTTTCTCTTCATTTAGCTGGTGTTAGTTCAATTTTAGGAGCCGTAAATTTCATTACAACAATTATTAATATACGATCAAATGGTTTAACCTTAGAACGAATACCTTTATTTGTTTGATCTGTATTTATTACAGCAATTTTATTATTATTGTCTTTA	Root	Metazoa	Arthropoda	Insecta	Psocoptera	Ectopsocidae	Ectopsocus	Ectopsocus californicus	349	0	0	0	0	0	0	0	0	0	0	0	0	0	0	0	0	0	0	0	0	0	0	0	0	0	0	0	0	0	0	0	0	0	0	0	0	0	0	0
ASV483	TCTTTCTAGTGCTATTGCACATTCAGGGGCTTCAGTAGATTTAACAATTTTTTCTTTACATTTAGCTGGAGTAAGCTCAATTTTAGGAGCAGTAAATTTTATTACTACTATTATTAATATACGATCAGATGGATTATCTTTTGAACGTATACCATTATTTATTTGGTCTGTATTCATTACAGCAATTTTACTATTACTTTCTTTA	Root	Metazoa	Arthropoda	Insecta	Psocoptera	Elipsocidae	Propsocus	Propsocus pulchripennis	10481	0	0	0	0	0	0	0	0	0	0	0	0	0	0	0	0	0	0	0	0	0	0	0	0	0	0	0	0	0	4	0	1	0	0	0	0	0	229	0
ASV484	TCTCGCAAGAGGAATTGCACACGCCGGAGCATCCGTAGACTTAGCCATCTTCTCACTACACCTAGCAGGTGTATCATCAATTCTAGGAGCAGTAAACTTCATTTCAACAACAATCAACATAAAACCAAAGAGTATAAAACCTGAACGGATCCCACTATTTGTATGATCAGTTGCCATCACAGCACTACTATTACTACTATCGCTA	Root	Metazoa	Arthropoda	Insecta	Termitoidae	Rhinotermitidae	Coptotermes	Coptotermes acinaciformis	12423	0	0	0	0	0	0	0	0	0	0	0	0	0	0	0	0	0	0	0	0	0	0	0	0	0	0	0	0	0	0	0	0	0	0	0	0	0	0	0
ASV485	TCTCGCAAGAGCAATTGCCCACGCTGGAGCATCTGTAGATCTAGCTATTTTCTCTTTACACCTAGCAGGAGTGTCATCTATCCTGGGAGCAGTAAACTTTATCACGACGACAATCAACATAAAGCCAAAAAGCATGAAGCCTGAACGAATCCCTCTATTCGTATGATCAATTGCCATCACTGCTCTACTACTTCTACTATCCCTA	Root	Metazoa	Arthropoda	Insecta	Termitoidae	Termitoidae sp.	Termitoidae sp.	Termitoidae sp.	138	2	10	14	0	0	0	0	0	0	0	28	10	0	0	3	12	13	18	1	0	0	0	8	9	0	0	0	2	0	0	4	0	0	0	0	0	0	0	0
ASV486	TTTATCAACATTTTATCATTCAGGACCTTCAGTAGACTTAACAATTTTTTCTTTACACCTTGCAGGGATTTCTTCAATTTTGGGTGCCTTAAATTTTATTACTACAATTATTAATCTTAAAGCAAAAAACCTTTCAGCAGAAAAAATTAGACTATTTGTCTGATCAGTTATTTTAACAGCTATTCTCCTTCTTTTATCTCTG	Root	Metazoa	Arthropoda	Insecta	Thysanoptera	Thripidae	Frankliniella	Frankliniella fusca	274	0	0	0	0	0	0	0	0	0	0	0	0	0	0	0	0	0	0	0	0	0	0	0	0	0	0	0	0	0	0	0	0	0	0	0	0	0	0	0
ASV487	TTTGTCAACTTTTTATCACTCTGGACCATCAGTAGATTTAACTATTTTTTCCCTTCATTTAGCAGGTATTTCTTCAATTCTAGGAGCTTTAAATTTTATTACAACGATTTTAAATTTAAAGATCAAAAAATTAACAACGGAAAAGATAACTTTATTTGTTTGATCAGTTATTTTAACAGCTATTTTATTATTATTGTCGTTA	Root	Metazoa	Arthropoda	Insecta	Thysanoptera	Thripidae	Frankliniella	Frankliniella occidentalis	41425	0	0	0	0	0	0	0	0	0	0	0	0	0	0	0	0	0	0	0	0	0	0	0	0	0	0	0	0	0	0	0	0	0	0	0	0	0	0	0
ASV488	TTTATCAACATTTTTTCACTCGGGAATTTCAGTAGATTTAACAATTTTTTCTCTTCATCTAGCAGGTATCTCATCAATCTTAGGAGCATTAAACTTTATTACTACTATTTTGAATTTAAAATTAAAAAATTTATCTAATGAAAAATCATCTTTATTTGTTTGATCAGTTTTTTTAACCGCCATTTTATTACTTCTTTCTCTA	Root	Metazoa	Arthropoda	Insecta	Thysanoptera	Thripidae	Frankliniella	Frankliniella schultzei	5887	0	0	0	0	0	0	0	0	0	66	0	0	0	0	0	0	0	0	0	0	0	0	0	0	0	0	0	0	0	0	0	0	0	0	0	0	0	0	0
ASV489	ATTATCAACATTTTATCATTCAGGTATATCAGTAGATCTAACAATCTTTTCTCTTCACCTAGCAGGAATTTCATCAATTCTTGGAGCACTAAATTTTATTACAACAATCTTAAATTTAAAGTCTAAAAATTTATCTAGAGAAAAATTAAGATTATTTTCTTGATCAGTTTTACTAACAGCAATTCTACTTTTATTATCTCTT	Root	Metazoa	Arthropoda	Insecta	Thysanoptera	Thripidae	Microcephalothrips	Microcephalothrips abdominalis	204	0	0	0	0	0	0	0	0	0	0	0	0	0	0	0	0	0	0	0	0	0	0	0	0	0	0	0	0	0	0	0	0	0	0	0	0	0	0	0
ASV490	ATTATCAACTTTTTATCATTCAGGAATTTCTGTAGATTTAACAATTTTTTCTCTTCATCTAGCAGGAATTTCATCAATTTTAGGGGCATTAAATTTTATTACCACAATTATTAATTTGAAAAATAAAGAACTTTCAGCAGAAAAATTGAGATTATTTGTTTGATCAGTGATATTAACAGCAATTCTTTTACTTTTATCATTA	Root	Metazoa	Arthropoda	Insecta	Thysanoptera	Thripidae	Thrips	Thrips australis	7807	0	0	0	0	0	9	7	111	84	0	0	0	16	31	0	0	0	0	0	0	0	0	0	0	0	0	0	0	0	0	0	0	36	0	0	0	0	18	0
ASV491	ACTCTCAACTTTTTATCACTCAGGAATTTCAGTAGATTTAACAATCTTTTCTCTACATCTAGCAGGAATTTCATCTATTCTAGGAGCATTAAATTTTATCACAACCATTATTAATTTAAAAGCTAAAAAATTATCAGCAGAAAAAATAAGATTATTTGTTTGATCAGTTATGTTAACGGCTATTCTTTTACTTCTATCTCTA	Root	Metazoa	Arthropoda	Insecta	Thysanoptera	Thripidae	Thrips	Thrips sp. 1	22248	0	0	0	0	0	0	0	0	0	0	0	0	0	0	0	0	0	0	0	0	28	0	0	0	0	0	0	0	0	0	0	0	0	0	0	0	0	0	0
ASV492	CCTCTCAACTTTTTATCACTCAGGAATTTCAGTGGATTTAACAATTTTTTCTCTTCATCTAGCAGGAATTTCATCTATTCTAGGAGCATTAAATTTTATTACAACTATTATTAATTTAAAAGCTAAAAAATTGTCAGCAGAAAAAATGAGATTATTTGTTTGATCAGTTATGTTAACAGCTATTCTTTTACTTTTATCTCTG	Root	Metazoa	Arthropoda	Insecta	Thysanoptera	Thripidae	Thrips	Thrips sp. 2	497	0	0	0	0	0	0	0	0	0	0	0	0	0	0	0	0	0	0	0	0	0	0	0	0	0	0	0	0	0	0	0	0	0	0	0	0	0	0	0
ASV493	CCTTTCAACTTTTTATCATTCAGGAATTTCAGTAGATTTAACAATTTTTTCTCTTCATTTAGCAGGAATTTCATCTATTTTAGGGGCATTAAACTTTATTACAACTATTATTAATTTAAAAGCCAAAAAATTATCAGCAGAGAAAATAAGATTATTTGTTTGATCAGTTATATTAACAGCTATTCTTTTACTGTTATCATTG	Root	Metazoa	Arthropoda	Insecta	Thysanoptera	Thripidae	Thrips	Thrips sp. 3	368	0	0	0	0	0	0	0	0	0	0	0	0	0	0	0	0	0	0	0	0	0	0	0	0	0	0	0	0	0	0	0	0	0	0	0	0	0	0	0
ASV494	TTTATCAACGTTTTATCATTCAGGACCTTCAGTAGACTTAACAATTTTTTCTTTACACCTTGCAGGGATTTCTTCAATTTTAGGTGCCTTAAATTTTATTACTACAATTATTAATCTTAAAGCAAAAAACCTTTCAGCAGAAAAAATTAGACTATTTGTCTGATCAGTTATTTTAACAGCCATTCTTCTTCTTTTATCTTTA	Root	Metazoa	Arthropoda	Insecta	Thysanoptera	Thripidae	Thrips	Thrips tabaci	17783	0	0	0	0	0	0	6	0	0	0	0	0	0	0	0	0	0	0	0	0	0	0	0	0	0	0	0	60	0	0	0	0	0	0	0	0	0	0	0
ASV495	ATTATCAACATTTTATCATTCAGGAATTTCAGTAGACTTAACAATTTTTTCTCTTCATTTGGCAGGAATTTCATCAATTTTAGGTGCTCTTAACTTTATCACAACTATCATTAATCTAAAAAGTAAAAATTTATCAGCAGAAAAAATGAGTCTTTTTATTTGATCAGTTATATTAACAGCAATTCTTCTACTTTTATCTTTG	Root	Metazoa	Arthropoda	Insecta	Thysanoptera	Thripidae	Thrips	Thrips trehernei	12116	0	0	0	0	0	0	0	0	0	0	0	0	0	0	0	0	0	0	0	0	0	0	0	0	0	0	1294	8073	0	0	0	0	0	0	0	0	0	0	0
ASV496	TCTTTCAACCTTTTATCATTCTGGAATTTCAGTAGATTTAACTATTTTTTCATTACATTTAGCAGGAATCTCCTCTATTTTAGGAGCTCTAAACTTTATTACAACTATTTTAAATTTAAAAATTAAAAAATTAACACCAGAACTTACCCCTTTATTTGTTTGATCAGTAATCCTAACAGCAATTCTTTTACTTCTCTCTTTA	Root	Metazoa	Arthropoda	Insecta	Thysanoptera	Thysanoptera sp.	Thysanoptera sp.	Thysanoptera sp.	1398	0	0	0	0	0	0	0	358	370	0	0	0	0	0	0	0	0	0	0	0	0	0	0	0	0	0	0	0	0	0	0	0	18	0	0	0	0	0	0
ASV497	TTTAGCAAGAAATATCGGTCATATAGGAAGATCCGTAGATTTATCTATTTTTTCCCTCCACATAGCAGGAATTTCTTCAATTTTAGGAGCCATCAATTTTATTACAACTTGCATAAGAATAAAACCTAAAAGTATACTTTTAGATCAAATACCACTTTTTGTTTGATCAGTTTTAATTACAGCTTTCTTACTTCTTTTATCCCTT	Root	Metazoa	Arthropoda	Insecta	Trichoptera	Leptoceridae	Oecetis	Oecetis pechana	45917	0	0	0	0	0	0	0	0	0	0	0	0	0	0	0	0	0	0	0	0	0	0	0	0	0	0	0	0	0	0	0	0	0	0	0	0	0	0	0
									Totals:	12344965	4798	98640	160909	51379	160508	96945	78472	76538	74738	150512	55980	33662	48863	93729	121740	126455	88127	161507	126485	142515	112775	112827	63357	140456	134469	153676	8955	108856	109048	143564	193411	147115	19730	172255	143364	111985	104687	183313	187583
[truncated: 85 more columns]
